# Supplementary material for: Intron retention, a novel method for evaluating the response to ketamine in patients with treatment-resistant depression
Source: Research Square preprint supplement (doi:10.21203/rs.3.rs-5823020/v1), 2025-01-30
Supplement: Supplementary file 1 [file a0e62cd54f736d972bd2aa17.xlsx]

## Sheet: S1
Table S1. List of genes with significant changes in RNA expression between CON and non-Responders (546 up-regulated and 208 down-regulated genes) (Fig.2A(i))
Ensembl	symbol	logFC	logCPM	LR	PValue	FDR	DEG
ENSG00000169245	CXCL10	3.16142	1.33841	38.2494	6.23e-10	3.9e-05	Up
ENSG00000185338	SOCS1	1.53028	2.76648	26.7256	2.34e-07	0.00490178	Up
ENSG00000078081	LAMP3	2.68396	2.6547	24.3263	8.13e-07	0.0101994	Up
ENSG00000108387	SEPTIN4	2.05049	2.07662	21.1074	4.34e-06	0.0297289	Up
ENSG00000010030	ETV7	2.25037	3.49811	20.4186	6.22e-06	0.0325158	Up
ENSG00000187608	ISG15	2.42616	7.11005	19.9345	8.01e-06	0.0386597	Up
ENSG00000184979	USP18	2.21317	2.90864	18.8884	1.39e-05	0.0579417	Up
ENSG00000179044	EXOC3L1	1.972	2.01217	17.3887	3.05e-05	0.102994	Up
ENSG00000225492	GBP1P1	2.1316	0.0130655	17.3429	3.12e-05	0.102994	Up
ENSG00000188157	AGRN	1.48546	3.23409	16.4025	5.12e-05	0.145996	Up
ENSG00000168062	BATF2	2.0354	4.12013	15.8161	6.98e-05	0.154399	Up
ENSG00000162772	ATF3	1.85528	1.88839	15.9147	6.63e-05	0.154399	Up
ENSG00000138646	HERC5	2.20131	6.52697	15.5609	7.99e-05	0.156561	Up
ENSG00000100336	APOL4	1.69093	0.545764	15.2733	9.3e-05	0.158798	Up
ENSG00000135114	OASL	1.80986	6.5459	15.3028	9.16e-05	0.158798	Up
ENSG00000152766	ANKRD22	1.93936	2.75752	15.3242	9.05e-05	0.158798	Up
ENSG00000168026	TTC21A	0.961107	3.34888	14.9966	0.000107706	0.164737	Up
ENSG00000005513	SOX8	0.988742	1.46844	14.5371	0.000137425	0.175827	Up
ENSG00000108771	DHX58	1.12317	5.7272	14.4817	0.000141528	0.175827	Up
ENSG00000140464	PML	1.01015	6.75592	14.5189	0.000138757	0.175827	Up
ENSG00000149131	SERPING1	2.11994	5.68266	14.493	0.000140678	0.175827	Up
ENSG00000269720	CCDC194	1.12774	0.709954	14.2061	0.000163839	0.193209	Up
ENSG00000002549	LAP3	1.39992	6.58179	14.0485	0.000178158	0.196005	Up
ENSG00000139880	CDH24	0.622625	0.87339	13.1563	0.000286557	0.246363	Up
ENSG00000068079	IFI35	1.22005	6.26884	12.7088	0.000363946	0.256439	Up
ENSG00000134321	RSAD2	2.73834	7.03624	12.6851	0.000368575	0.256815	Up
ENSG00000130589	HELZ2	1.01456	7.435	12.3752	0.000435083	0.282512	Up
ENSG00000178685	PARP10	0.754507	7.72097	12.276	0.000458815	0.286145	Up
ENSG00000185507	IRF7	1.1252	7.37787	12.2677	0.000460863	0.286145	Up
ENSG00000185745	IFIT1	2.19699	7.22577	12.0291	0.000523765	0.302255	Up
ENSG00000155363	MOV10	0.797316	6.23994	11.9234	0.000554335	0.309073	Up
ENSG00000211970	IGHV4-61	1.8963	1.28996	11.5672	0.000671245	0.337573	Up
ENSG00000225886	ENSG00000225886	1.96306	0.918502	11.5075	0.000693143	0.337573	Up
ENSG00000170175	CHRNB1	0.426126	3.10783	11.4353	0.000720615	0.339773	Up
ENSG00000134326	CMPK2	2.09491	5.30302	11.3109	0.000770539	0.355899	Up
ENSG00000182118	FAM89A	0.527254	1.03372	11.2731	0.000786367	0.359472	Up
ENSG00000138606	SHF	0.671674	0.321233	11.0417	0.00089086	0.377315	Up
ENSG00000148204	CRB2	1.11302	-0.70377	10.9835	0.000919278	0.379433	Up
ENSG00000158163	DZIP1L	1.23056	-0.498807	10.9826	0.000919692	0.379433	Up
ENSG00000111331	OAS3	1.9462	7.97562	10.9663	0.000927822	0.380286	Up
ENSG00000170581	STAT2	0.970777	8.21988	10.8999	0.000961717	0.386598	Up
ENSG00000143891	GALM	0.83375	4.58683	10.7282	0.00105513	0.401013	Up
ENSG00000214182	PTMAP5	0.507308	1.80036	10.5606	0.00115521	0.412513	Up
ENSG00000182179	UBA7	0.435115	7.73018	10.6238	0.00111639	0.412513	Up
ENSG00000126709	IFI6	1.68945	7.06195	10.5824	0.00114171	0.412513	Up
ENSG00000059378	PARP12	0.931513	6.92063	10.5702	0.00114924	0.412513	Up
ENSG00000142687	KIAA0319L	0.530836	7.29865	10.4974	0.00119541	0.420612	Up
ENSG00000137200	CMTR1	0.658288	6.68557	10.4813	0.00120592	0.420612	Up
ENSG00000162840	MT2P1	1.2956	-0.319298	10.4354	0.00123623	0.420612	Up
ENSG00000196141	SPATS2L	1.53109	2.9118	10.4572	0.00122172	0.420612	Up
ENSG00000175643	RMI2	0.995334	1.77665	10.3555	0.00129087	0.426055	Up
ENSG00000166016	ABTB2	0.773945	2.77027	10.3419	0.00130041	0.42612	Up
ENSG00000282851	BISPR	0.759745	3.89572	10.2708	0.00135149	0.43032	Up
ENSG00000138035	PNPT1	0.9435	3.98317	10.2334	0.00137919	0.43032	Up
ENSG00000131203	IDO1	1.37236	3.31681	10.2333	0.00137927	0.43032	Up
ENSG00000108679	LGALS3BP	0.933926	5.42724	10.1572	0.00143736	0.434164	Up
ENSG00000157601	MX1	1.63418	8.16308	10.1579	0.00143687	0.434164	Up
ENSG00000119922	IFIT2	1.60771	8.72086	10.1675	0.0014294	0.434164	Up
ENSG00000117228	GBP1	1.4166	7.37575	10.0174	0.00155067	0.456537	Up
ENSG00000272491	ENSG00000272491	1.28101	-1.10418	9.90608	0.00164734	0.478262	Up
ENSG00000170486	KRT72	1.31191	3.81573	9.87127	0.0016788	0.478534	Up
ENSG00000070985	TRPM5	0.885522	-0.999413	9.8268	0.00171988	0.47867	Up
ENSG00000156587	UBE2L6	0.916532	7.80854	9.75648	0.00178692	0.486933	Up
ENSG00000129673	AANAT	0.830556	0.217689	9.6646	0.00187853	0.501288	Up
ENSG00000183397	C19orf71	0.453872	2.91317	9.57142	0.0019763	0.512122	Up
ENSG00000188282	RUFY4	0.975598	2.03337	9.57168	0.00197602	0.512122	Up
ENSG00000065717	TLE2	0.609418	3.18335	9.49847	0.00205644	0.518092	Up
ENSG00000125148	MT2A	1.07071	4.86008	9.49782	0.00205717	0.518092	Up
ENSG00000038945	MSR1	1.36602	2.10706	9.48515	0.00207142	0.519594	Up
ENSG00000213213	CCDC183	0.5077	0.329473	9.16743	0.00246361	0.520629	Up
ENSG00000274294	ENSG00000274294	0.831792	-1.46734	8.81791	0.00298288	0.520629	Up
ENSG00000059915	PSD	0.717864	2.17014	9.12908	0.00251578	0.520629	Up
ENSG00000108852	MPP2	0.824186	0.634926	9.03507	0.00264849	0.520629	Up
ENSG00000118707	TGIF2	0.341863	5.24072	9.3366	0.00224622	0.520629	Up
ENSG00000158050	DUSP2	0.721609	4.02846	9.16198	0.00247096	0.520629	Up
ENSG00000174137	FAM53A	0.548351	0.441558	9.1784	0.00244888	0.520629	Up
ENSG00000090104	RGS1	1.04601	0.0840862	9.09695	0.00256037	0.520629	Up
ENSG00000284194	SCO2	0.976213	2.13804	8.77046	0.00306149	0.520629	Up
ENSG00000116663	FBXO6	0.901606	3.22744	9.07111	0.0025968	0.520629	Up
ENSG00000100342	APOL1	0.86615	6.16202	9.34879	0.00223132	0.520629	Up
ENSG00000111335	OAS2	1.2563	7.80667	9.21933	0.00239473	0.520629	Up
ENSG00000115267	IFIH1	1.13451	5.69859	8.90758	0.0028399	0.520629	Up
ENSG00000119917	IFIT3	1.66726	8.39882	9.38105	0.0021924	0.520629	Up
ENSG00000162654	GBP4	0.904906	6.51551	8.77754	0.00304963	0.520629	Up
ENSG00000254503	ENSG00000254503	0.687673	0.538999	8.68084	0.00321573	0.521716	Up
ENSG00000130303	BST2	0.81199	7.11914	8.52911	0.0034951	0.530696	Up
ENSG00000133106	EPSTI1	1.44848	6.15532	8.53747	0.00347909	0.530696	Up
ENSG00000173530	TNFRSF10D	0.32365	3.7659	8.40619	0.00373946	0.535537	Up
ENSG00000274373	ENSG00000274373	1.00748	-0.618497	8.40182	0.00374845	0.535537	Up
ENSG00000105088	OLFM2	0.548165	3.60129	8.418	0.00371524	0.535537	Up
ENSG00000279254	ENSG00000279254	0.793984	-0.445949	8.36592	0.00382322	0.535537	Up
ENSG00000286129	ENSG00000286129	0.612822	0.122792	8.36375	0.0038278	0.535537	Up
ENSG00000121858	TNFSF10	0.934243	8.03148	8.43841	0.00367376	0.535537	Up
ENSG00000269053	ENSG00000269053	0.729137	-0.322363	8.34734	0.00386253	0.535883	Up
ENSG00000167393	PPP2R3B	0.405068	4.36401	8.27667	0.00401577	0.54485	Up
ENSG00000242779	ZNF702P	1.25065	1.01959	8.27835	0.00401205	0.54485	Up
ENSG00000218052	ADAMTS7P4	0.90735	0.305053	8.2817	0.00400465	0.54485	Up
ENSG00000130813	SHFL	0.563004	5.65063	8.22326	0.00413568	0.54485	Up
ENSG00000055332	EIF2AK2	1.0984	6.77356	8.22517	0.00413133	0.54485	Up
ENSG00000204314	PRRT1	0.878555	0.930009	8.21372	0.00415749	0.545432	Up
ENSG00000106624	AEBP1	0.701798	3.73562	8.19519	0.00420017	0.548109	Up
ENSG00000159079	CFAP298	0.295215	2.82559	8.17043	0.00425788	0.548962	Up
ENSG00000196743	GM2A	0.549685	6.15274	8.16805	0.00426347	0.548962	Up
ENSG00000124256	ZBP1	0.919095	6.47348	8.1679	0.00426384	0.548962	Up
ENSG00000131773	KHDRBS3	0.909868	-1.83106	8.14412	0.00432011	0.552872	Up
ENSG00000133398	MED10	0.26387	4.13967	8.08529	0.00446259	0.556774	Up
ENSG00000174109	C16orf91	0.40133	2.62112	8.08497	0.0044634	0.556774	Up
ENSG00000108106	UBE2S	0.714326	3.69774	8.08732	0.00445761	0.556774	Up
ENSG00000142632	ARHGEF19	0.396728	3.03692	8.06685	0.00450825	0.558921	Up
ENSG00000173193	PARP14	0.958469	8.46122	8.06291	0.00451805	0.558921	Up
ENSG00000156869	FRRS1	0.695996	2.23724	7.97571	0.00474092	0.567528	Up
ENSG00000132256	TRIM5	0.745896	5.1668	7.98034	0.0047288	0.567528	Up
ENSG00000175518	UBQLNL	0.660155	0.781375	7.95942	0.00478376	0.570637	Up
ENSG00000233223	ENSG00000233223	0.537463	1.82052	7.94358	0.00482583	0.573159	Up
ENSG00000136816	TOR1B	0.688944	5.71027	7.89127	0.00496741	0.581168	Up
ENSG00000204387	SNHG32	0.47368	3.66245	7.8854	0.00498354	0.581249	Up
ENSG00000228203	GRASLND	0.856293	-0.050436	7.87467	0.0050132	0.582181	Up
ENSG00000124787	RPP40	0.496903	0.472121	7.85353	0.00507215	0.58313	Up
ENSG00000285219	HULC	0.92243	-0.961878	7.8446	0.00509726	0.58313	Up
ENSG00000013374	NUB1	0.53454	6.81098	7.86795	0.00503186	0.58313	Up
ENSG00000260805	ENSG00000260805	0.438654	-0.20206	7.78366	0.0052721	0.587235	Up
ENSG00000110455	ACCS	0.716565	4.79826	7.77256	0.00530458	0.589583	Up
ENSG00000162972	MAIP1	0.288271	2.62977	7.75594	0.00535363	0.591541	Up
ENSG00000138755	CXCL9	1.0114	-0.695855	7.73625	0.00541231	0.591541	Up
ENSG00000136514	RTP4	1.06691	3.9629	7.70326	0.00551212	0.59615	Up
ENSG00000196581	AJAP1	0.913801	0.1088	7.64629	0.00568893	0.608793	Up
ENSG00000196793	ZNF239	0.525728	1.08573	7.63739	0.00571705	0.610233	Up
ENSG00000120057	SFRP5	1.31144	0.911339	7.61544	0.00578705	0.610596	Up
ENSG00000159228	CBR1	0.489336	4.17924	7.6167	0.00578302	0.610596	Up
ENSG00000157693	TMEM268	0.515363	5.02273	7.61897	0.00577573	0.610596	Up
ENSG00000106560	GIMAP2	0.478915	6.10002	7.60259	0.00582846	0.611209	Up
ENSG00000279861	ENSG00000279861	0.601677	2.90921	7.59312	0.00585914	0.611393	Up
ENSG00000186364	NUDT17	0.360237	1.71151	7.52402	0.00608818	0.619546	Up
ENSG00000240356	RPL23AP7	0.637491	2.29482	7.52144	0.00609689	0.619546	Up
ENSG00000165689	ENTR1	0.263622	5.16497	7.53472	0.00605213	0.619546	Up
ENSG00000264070	DND1P1	1.24403	-0.537104	7.52282	0.00609223	0.619546	Up
ENSG00000154451	GBP5	1.18298	8.43414	7.52538	0.00608358	0.619546	Up
ENSG00000118162	KPTN	0.670756	2.63916	7.49951	0.00617159	0.623221	Up
ENSG00000067221	STOML1	0.486335	3.28858	7.47355	0.0062612	0.626746	Up
ENSG00000183691	NOG	0.850455	3.06395	7.473	0.0062631	0.626746	Up
ENSG00000100401	RANGAP1	0.410687	6.46533	7.45415	0.00632904	0.628783	Up
ENSG00000277511	ENSG00000277511	0.935885	0.617464	7.43507	0.00639648	0.629706	Up
ENSG00000137965	IFI44	1.71243	5.98073	7.40524	0.00650343	0.63801	Up
ENSG00000260807	CEROX1	0.841676	3.93451	7.29531	0.00691348	0.662679	Up
ENSG00000089127	OAS1	1.16975	7.41677	7.2741	0.00699559	0.667722	Up
ENSG00000061938	TNK2	0.331941	7.83669	7.25982	0.00705144	0.66898	Up
ENSG00000124587	PEX6	0.520793	5.67217	7.21878	0.00721448	0.677276	Up
ENSG00000197457	STMN3	0.467345	6.27685	7.19439	0.00731318	0.681556	Up
ENSG00000112759	SLC29A1	0.75066	4.86554	7.17566	0.00738993	0.683514	Up
ENSG00000168421	RHOH	0.314544	6.04095	7.14474	0.0075184	0.684295	Up
ENSG00000147144	CCDC120	0.302529	3.04033	7.1509	0.00749263	0.684295	Up
ENSG00000135148	TRAFD1	0.615924	7.21462	7.16202	0.00744631	0.684295	Up
ENSG00000117519	CNN3	0.698282	0.995092	7.11539	0.00764251	0.685086	Up
ENSG00000136104	RNASEH2B	0.303042	5.42869	7.11042	0.00766371	0.685086	Up
ENSG00000271918	ENSG00000271918	0.434445	0.41416	7.04441	0.00795132	0.688937	Up
ENSG00000109971	HSPA8	0.32893	9.69935	7.05657	0.00789752	0.688937	Up
ENSG00000158042	MRPL17	0.420133	3.53248	7.06089	0.0078785	0.688937	Up
ENSG00000223749	MIR503HG	0.588788	-0.468352	7.0514	0.00792035	0.688937	Up
ENSG00000120217	CD274	1.2752	4.28688	7.04754	0.00793744	0.688937	Up
ENSG00000221963	APOL6	0.838782	7.26264	7.02831	0.00802311	0.693016	Up
ENSG00000123737	EXOSC9	0.325317	4.48429	7.01129	0.00809971	0.69771	Up
ENSG00000173786	CNP	0.446436	5.98382	6.98953	0.00819879	0.702035	Up
ENSG00000151692	RNF144A	0.524343	5.00837	6.95313	0.00836728	0.71003	Up
ENSG00000249502	MED28-DT	1.13572	-0.223738	6.94289	0.00841531	0.71314	Up
ENSG00000184867	ARMCX2	0.488903	2.20052	6.81318	0.00904875	0.719061	Up
ENSG00000196951	SCOC-AS1	0.663159	-0.419771	6.87463	0.00874277	0.719061	Up
ENSG00000255571	MIR9-3HG	0.605606	2.47551	6.88594	0.00868766	0.719061	Up
ENSG00000171943	SRGAP2C	0.600335	2.81699	6.8075	0.0090776	0.719252	Up
ENSG00000132740	IGHMBP2	0.496209	5.33952	6.7738	0.00925057	0.726947	Up
ENSG00000180902	D2HGDH	0.556422	4.98105	6.7318	0.00947087	0.727284	Up
ENSG00000249087	ZNF436-AS1	0.34541	0.978182	6.72332	0.00951601	0.727284	Up
ENSG00000185404	SP140L	0.273274	5.90236	6.75523	0.0093473	0.727284	Up
ENSG00000197361	FBXL22	0.705615	-1.41363	6.68169	0.00974083	0.731638	Up
ENSG00000136147	PHF11	0.492434	6.33705	6.67786	0.00976178	0.73225	Up
ENSG00000168874	ATOH8	1.15221	1.98412	6.60873	0.010148	0.744398	Up
ENSG00000137959	IFI44L	1.80799	6.54165	6.60632	0.0101617	0.744441	Up
ENSG00000092096	SLC22A17	0.723622	2.6281	6.59978	0.0101991	0.744573	Up
ENSG00000110057	UNC93B1	0.527044	7.46189	6.59444	0.0102297	0.745073	Up
ENSG00000118096	IFT46	0.269143	2.94411	6.58431	0.0102882	0.745518	Up
ENSG00000137842	TMEM62	0.354568	3.66757	6.58307	0.0102953	0.745518	Up
ENSG00000164512	ANKRD55	0.540586	2.78898	6.53391	0.0105837	0.750085	Up
ENSG00000123610	TNFAIP6	1.13323	4.58832	6.53989	0.0105482	0.750085	Up
ENSG00000127743	IL17B	0.695674	-1.0192	6.51875	0.0106743	0.752116	Up
ENSG00000166592	RRAD	0.945395	-1.74864	6.51213	0.0107141	0.753104	Up
ENSG00000272989	LINC02012	0.803702	-0.530724	6.49388	0.0108247	0.757605	Up
ENSG00000167280	ENGASE	0.431659	6.69668	6.4394	0.0111616	0.762516	Up
ENSG00000169242	EFNA1	0.706993	0.741857	6.44253	0.011142	0.762516	Up
ENSG00000105889	STEAP1B	0.795718	-1.24651	6.46006	0.0110326	0.762516	Up
ENSG00000189227	C15orf61	0.34967	1.03226	6.45264	0.0110788	0.762516	Up
ENSG00000162576	MXRA8	0.642136	2.66914	6.44771	0.0111096	0.762516	Up
ENSG00000168209	DDIT4	0.605024	5.648	6.45156	0.0110855	0.762516	Up
ENSG00000289421	ENSG00000289421	0.706418	-0.788259	6.39538	0.0114418	0.769484	Up
ENSG00000111057	KRT18	0.692173	1.29329	6.40097	0.0114058	0.769484	Up
ENSG00000151640	DPYSL4	1.51974	1.43853	6.39145	0.0114671	0.769484	Up
ENSG00000272398	CD24	0.53861	4.66208	6.3835	0.0115186	0.769484	Up
ENSG00000110492	MDK	0.691494	1.11043	6.35539	0.0117025	0.774682	Up
ENSG00000287543	ENSG00000287543	0.720077	0.455541	6.31406	0.0119784	0.778332	Up
ENSG00000168004	PLAAT5	0.832363	0.319714	6.28937	0.0121464	0.779441	Up
ENSG00000166313	APBB1	0.492902	5.89303	6.27099	0.012273	0.78057	Up
ENSG00000148219	ASTN2	0.428204	0.666458	6.23385	0.0125331	0.790694	Up
ENSG00000167525	PROCA1	0.361302	3.71364	6.215	0.0126672	0.791886	Up
ENSG00000256812	CAPNS2	0.849071	-1.82693	6.21889	0.0126395	0.791886	Up
ENSG00000161091	MFSD12	0.367036	5.91986	6.21012	0.0127022	0.792064	Up
ENSG00000247134	ENSG00000247134	0.61443	-0.429397	6.17961	0.0129231	0.799898	Up
ENSG00000142303	ADAMTS10	0.506031	4.61674	6.13415	0.0132595	0.802609	Up
ENSG00000119986	AVPI1	0.546358	0.821957	6.14702	0.0131634	0.802609	Up
ENSG00000164638	SLC29A4	0.712091	-0.57727	6.13961	0.0132186	0.802609	Up
ENSG00000146425	DYNLT1	0.504682	6.1312	6.15228	0.0131243	0.802609	Up
ENSG00000102524	TNFSF13B	0.852185	6.61992	6.14373	0.0131879	0.802609	Up
ENSG00000034053	APBA2	0.479397	5.68523	6.10815	0.013456	0.809661	Up
ENSG00000289416	ENSG00000289416	0.753842	-1.54369	6.10291	0.013496	0.810663	Up
ENSG00000099957	P2RX6	0.685047	-0.264499	5.62609	0.0176951	0.811218	Up
ENSG00000170915	PAQR8	0.341896	5.18603	4.66027	0.0308684	0.811218	Up
ENSG00000179627	ZBTB42	0.336962	3.15251	6.02871	0.014075	0.811218	Up
ENSG00000197586	ENTPD6	0.268906	5.86764	4.68549	0.0304183	0.811218	Up
ENSG00000272092	ENSG00000272092	0.539351	-1.20711	4.41755	0.0355711	0.811218	Up
ENSG00000272711	HK2-DT	0.38642	0.778185	5.44332	0.0196432	0.811218	Up
ENSG00000283063	TRBV6-2	0.714423	2.60957	4.84859	0.0276687	0.811218	Up
ENSG00000003249	DBNDD1	0.608041	2.84018	4.67261	0.0306473	0.811218	Up
ENSG00000064545	TMEM161A	0.417275	3.90896	4.53588	0.0331913	0.811218	Up
ENSG00000102409	BEX4	0.328484	4.23613	5.60857	0.0178728	0.811218	Up
ENSG00000105559	PLEKHA4	0.62285	0.768583	5.80066	0.0160202	0.811218	Up
ENSG00000109063	MYH3	0.296809	3.27405	5.36246	0.0205748	0.811218	Up
ENSG00000112511	PHF1	0.265566	6.97802	5.25796	0.0218466	0.811218	Up
ENSG00000114812	VIPR1	0.358418	5.47585	4.97015	0.0257884	0.811218	Up
ENSG00000122873	CISD1	0.373969	2.36697	5.96482	0.0145941	0.811218	Up
ENSG00000124225	PMEPA1	0.452433	2.45868	5.71367	0.0168333	0.811218	Up
ENSG00000129535	NRL	0.358067	1.27348	5.28685	0.0214871	0.811218	Up
ENSG00000130312	MRPL34	0.346435	4.47414	4.99301	0.0254499	0.811218	Up
ENSG00000130812	ANGPTL6	0.519391	0.439612	5.73672	0.0166138	0.811218	Up
ENSG00000133983	COX16	0.430173	0.406015	5.68896	0.0170719	0.811218	Up
ENSG00000136888	ATP6V1G1	0.374559	5.83788	5.37701	0.0204038	0.811218	Up
ENSG00000141013	GAS8	0.330902	1.08376	4.81466	0.0282187	0.811218	Up
ENSG00000147872	PLIN2	0.310129	5.56535	5.19785	0.0226149	0.811218	Up
ENSG00000149571	KIRREL3	0.731621	-0.0222089	5.88353	0.0152831	0.811218	Up
ENSG00000163050	COQ8A	0.394932	0.694519	5.54084	0.0185777	0.811218	Up
ENSG00000165724	ZMYND19	0.307363	3.58389	5.23074	0.0221911	0.811218	Up
ENSG00000169570	DTWD2	0.310961	1.80208	4.43722	0.0351635	0.811218	Up
ENSG00000174177	CTU2	0.349453	3.1819	5.01988	0.025058	0.811218	Up
ENSG00000174837	ADGRE1	0.468875	6.0223	4.89245	0.0269743	0.811218	Up
ENSG00000175701	MTLN	0.610987	2.70331	5.07092	0.0243305	0.811218	Up
ENSG00000177685	CRACR2B	0.720513	2.52594	6.00785	0.0142424	0.811218	Up
ENSG00000177854	TMEM187	0.44171	2.88589	5.19597	0.0226393	0.811218	Up
ENSG00000183793	NPIPA5	0.911782	1.67822	5.97614	0.0145007	0.811218	Up
ENSG00000186049	KRT73	1.03518	1.61172	5.70315	0.0169345	0.811218	Up
ENSG00000187690	EZHIP	0.673662	-1.47045	5.70267	0.0169391	0.811218	Up
ENSG00000196636	SDHAF3	0.342103	2.35253	4.95139	0.0260696	0.811218	Up
ENSG00000198719	DLL1	0.566051	1.05255	5.45469	0.0195159	0.811218	Up
ENSG00000214309	MBLAC1	0.525385	0.032929	4.87198	0.0272961	0.811218	Up
ENSG00000221890	NPTXR	0.417962	3.20984	4.54198	0.0330733	0.811218	Up
ENSG00000224546	EIF4BP3	0.500655	2.05344	5.04137	0.0247489	0.811218	Up
ENSG00000225643	ENSG00000225643	0.659358	-1.16475	5.27858	0.0215894	0.811218	Up
ENSG00000228889	UBAC2-AS1	0.35568	-0.257776	4.69361	0.0302749	0.811218	Up
ENSG00000234184	LINC01781	0.846584	0.0904134	5.70621	0.016905	0.811218	Up
ENSG00000234745	HLA-B	0.381394	12.5224	4.74187	0.0294371	0.811218	Up
ENSG00000251432	LINC02615	0.427891	0.546527	4.77377	0.0288965	0.811218	Up
ENSG00000254521	SIGLEC12	1.2444	0.679232	5.78605	0.0161538	0.811218	Up
ENSG00000256039	LINC02446	0.642532	3.36876	4.85355	0.0275892	0.811218	Up
ENSG00000272696	ENSG00000272696	0.578889	-0.962427	4.90066	0.0268464	0.811218	Up
ENSG00000275993	ENSG00000275993	0.564395	1.16937	4.99373	0.0254393	0.811218	Up
ENSG00000278668	ENSG00000278668	0.504237	-1.01782	5.72636	0.016712	0.811218	Up
ENSG00000281538	ENSG00000281538	0.530522	-0.542817	4.62931	0.0314301	0.811218	Up
ENSG00000282939	TRBV7-2	0.590645	3.5321	5.22016	0.0223265	0.811218	Up
ENSG00000285535	ENSG00000285535	0.828688	1.40102	4.63862	0.0312601	0.811218	Up
ENSG00000288960	ENSG00000288960	0.698889	0.820172	5.39414	0.0202044	0.811218	Up
ENSG00000037042	TUBG2	0.310198	3.03825	4.5143	0.0336127	0.811218	Up
ENSG00000086061	DNAJA1	0.427743	6.54232	5.41526	0.0199615	0.811218	Up
ENSG00000088899	LZTS3	0.502449	1.83609	5.17284	0.0229427	0.811218	Up
ENSG00000091622	PITPNM3	0.557564	-0.369013	5.93102	0.0148766	0.811218	Up
ENSG00000102934	PLLP	0.367003	2.03691	4.53992	0.0331131	0.811218	Up
ENSG00000103355	PRSS33	0.887725	4.26844	5.05099	0.0246119	0.811218	Up
ENSG00000104951	IL4I1	0.484287	1.35387	4.62779	0.031458	0.811218	Up
ENSG00000105607	GCDH	0.332445	4.51972	5.05522	0.0245518	0.811218	Up
ENSG00000111716	LDHB	0.448158	3.31781	4.99431	0.0254307	0.811218	Up
ENSG00000115526	CHST10	0.371823	1.87902	5.08793	0.024093	0.811218	Up
ENSG00000124006	OBSL1	0.76631	-0.154113	5.34288	0.0208071	0.811218	Up
ENSG00000126353	CCR7	0.55635	8.02479	5.55979	0.0183776	0.811218	Up
ENSG00000130433	CACNG6	0.799767	2.39969	5.33334	0.0209213	0.811218	Up
ENSG00000135951	TSGA10	0.48533	1.3029	5.58476	0.0181174	0.811218	Up
ENSG00000139438	FAM222A	0.601518	-1.00095	4.6519	0.0310193	0.811218	Up
ENSG00000139914	FITM1	0.500384	0.950413	4.6371	0.0312879	0.811218	Up
ENSG00000140391	TSPAN3	0.263199	5.61016	4.4607	0.0346833	0.811218	Up
ENSG00000140511	HAPLN3	0.303826	5.75342	4.97612	0.0256996	0.811218	Up
ENSG00000143554	SLC27A3	0.423625	5.84476	4.694	0.0302682	0.811218	Up
ENSG00000145911	N4BP3	0.489345	3.15138	5.40567	0.0200715	0.811218	Up
ENSG00000148300	REXO4	0.266988	4.84459	4.53503	0.033208	0.811218	Up
ENSG00000154027	AK5	0.643616	3.07793	5.46371	0.0194154	0.811218	Up
ENSG00000154358	OBSCN	0.462733	5.57283	5.95964	0.0146371	0.811218	Up
ENSG00000154764	WNT7A	0.507353	1.72967	4.80585	0.0283633	0.811218	Up
ENSG00000157368	IL34	0.902293	-0.00896137	5.15287	0.023208	0.811218	Up
ENSG00000166002	SMCO4	0.556707	4.29437	5.14846	0.023267	0.811218	Up
ENSG00000166126	AMN	0.51818	1.32784	5.06299	0.0244421	0.811218	Up
ENSG00000166451	CENPN	0.310895	1.07	4.60127	0.0319483	0.811218	Up
ENSG00000166770	ZNF667-AS1	0.527679	1.42478	5.15107	0.023232	0.811218	Up
ENSG00000167272	POP5	0.281401	4.25344	5.23842	0.0220933	0.811218	Up
ENSG00000167642	SPINT2	0.330862	4.40317	5.93354	0.0148553	0.811218	Up
ENSG00000169249	ZRSR2	0.318159	5.33799	4.96122	0.0259219	0.811218	Up
ENSG00000171224	FAM241B	0.442778	1.2539	4.45142	0.0348722	0.811218	Up
ENSG00000172005	MAL	0.541649	5.60286	4.85468	0.0275712	0.811218	Up
ENSG00000172009	THOP1	0.406492	4.3666	5.05496	0.0245556	0.811218	Up
ENSG00000172731	LRRC20	0.412205	2.03046	5.41287	0.0199889	0.811218	Up
ENSG00000173762	CD7	0.595241	7.17041	5.70218	0.0169438	0.811218	Up
ENSG00000174326	SLC16A11	0.624123	0.739487	4.92459	0.0264771	0.811218	Up
ENSG00000174684	B4GAT1	0.351681	2.32972	4.96397	0.0258807	0.811218	Up
ENSG00000174807	CD248	0.941318	2.97717	5.52245	0.018774	0.811218	Up
ENSG00000175730	BAK1P1	0.356528	0.25336	4.49132	0.0340673	0.811218	Up
ENSG00000177732	SOX12	0.454039	3.48828	4.44438	0.0350164	0.811218	Up
ENSG00000179094	PER1	0.516604	5.33487	5.88165	0.0152995	0.811218	Up
ENSG00000179144	GIMAP7	0.344105	6.55106	4.95349	0.026038	0.811218	Up
ENSG00000179409	GEMIN4	0.288758	4.59566	5.66556	0.0173012	0.811218	Up
ENSG00000179965	ZNF771	0.481426	0.376074	4.56305	0.0326688	0.811218	Up
ENSG00000182557	SPNS3	0.651071	3.86659	4.84567	0.0277155	0.811218	Up
ENSG00000186301	MST1P2	0.520199	1.43421	5.46392	0.0194131	0.811218	Up
ENSG00000186468	RPS23	0.472291	6.9577	5.85169	0.0155621	0.811218	Up
ENSG00000187243	MAGED4B	0.635152	0.585578	4.89646	0.0269118	0.811218	Up
ENSG00000189013	KIR2DL4	0.86535	0.845084	4.50005	0.0338939	0.811218	Up
ENSG00000197093	GAL3ST4	0.463498	3.69567	4.43884	0.03513	0.811218	Up
ENSG00000197520	FAM177B	0.622354	0.252533	4.59943	0.0319825	0.811218	Up
ENSG00000197989	SNHG12	0.297507	4.15779	5.43946	0.0196868	0.811218	Up
ENSG00000198520	ARMH1	0.504203	5.14531	4.89747	0.0268961	0.811218	Up
ENSG00000204219	TCEA3	0.474157	3.34963	4.87426	0.0272601	0.811218	Up
ENSG00000211642	IGLV10-54	1.23918	0.683481	5.02508	0.0249827	0.811218	Up
ENSG00000214226	C17orf67	0.339613	1.86914	5.78461	0.0161671	0.811218	Up
ENSG00000224892	RPS4XP16	0.484813	0.702837	5.04247	0.0247332	0.811218	Up
ENSG00000232208	ENSG00000232208	0.791927	0.738062	4.99032	0.0254895	0.811218	Up
ENSG00000233016	SNHG7	0.404457	4.4491	4.59751	0.0320185	0.811218	Up
ENSG00000234160	ENSG00000234160	0.322829	0.527319	4.66961	0.0307008	0.811218	Up
ENSG00000253764	KBTBD11-AS1	0.799211	-1.48741	4.47474	0.0343993	0.811218	Up
ENSG00000255559	ZNF252P-AS1	0.356128	0.070025	4.65467	0.0309691	0.811218	Up
ENSG00000258511	LINC02295	0.725066	2.06565	5.48943	0.0191317	0.811218	Up
ENSG00000261150	EPPK1	0.803193	1.26775	4.85413	0.02758	0.811218	Up
ENSG00000268049	ENSG00000268049	0.556602	-1.17864	4.44889	0.0349239	0.811218	Up
ENSG00000273428	ENSG00000273428	0.621776	-1.80367	5.4292	0.0198028	0.811218	Up
ENSG00000275342	PRAG1	0.432067	4.8056	5.6583	0.0173729	0.811218	Up
ENSG00000276445	ENSG00000276445	0.401583	-0.542133	5.75655	0.0164273	0.811218	Up
ENSG00000278195	SSTR3	0.576391	3.58123	5.42814	0.0198148	0.811218	Up
ENSG00000282608	ADORA3	0.684957	2.72093	5.00721	0.0252419	0.811218	Up
ENSG00000290577	ENSG00000290577	0.708138	2.65739	4.53574	0.0331941	0.811218	Up
ENSG00000291143	ENSG00000291143	0.330855	3.72743	4.47127	0.0344693	0.811218	Up
ENSG00000031691	CENPQ	0.537307	0.790531	4.6473	0.0311024	0.811218	Up
ENSG00000088256	GNA11	0.484107	2.26212	5.14225	0.0233504	0.811218	Up
ENSG00000096092	TMEM14A	0.32798	1.59294	4.97404	0.0257304	0.811218	Up
ENSG00000101082	SLA2	0.324023	5.69975	4.8511	0.0276284	0.811218	Up
ENSG00000103056	SMPD3	0.615863	3.71853	5.69241	0.0170385	0.811218	Up
ENSG00000103647	CORO2B	0.791159	1.51491	5.1851	0.0227814	0.811218	Up
ENSG00000105289	TJP3	0.463315	2.75834	5.2477	0.0219758	0.811218	Up
ENSG00000105641	SLC5A5	0.450027	0.786005	5.09432	0.0240044	0.811218	Up
ENSG00000116863	ADPRS	0.352103	5.5419	5.3925	0.0202234	0.811218	Up
ENSG00000119147	ECRG4	0.812167	-0.111164	5.55141	0.0184658	0.811218	Up
ENSG00000122729	ACO1	0.394785	4.10618	5.59545	0.0180072	0.811218	Up
ENSG00000132600	PRMT7	0.331238	5.22935	5.23449	0.0221433	0.811218	Up
ENSG00000134824	FADS2	0.933709	4.48399	4.5951	0.0320634	0.811218	Up
ENSG00000140092	FBLN5	0.424513	3.51392	4.48863	0.034121	0.811218	Up
ENSG00000142655	PEX14	0.334428	3.78728	5.57052	0.0182653	0.811218	Up
ENSG00000142961	MOB3C	0.363893	5.86975	5.77507	0.016255	0.811218	Up
ENSG00000156508	EEF1A1	0.369642	12.4898	5.42264	0.0198773	0.811218	Up
ENSG00000160932	LY6E	0.994889	8.17037	5.47252	0.0193177	0.811218	Up
ENSG00000161692	DBF4B	0.399564	3.22291	5.47338	0.0193082	0.811218	Up
ENSG00000162512	SDC3	0.761127	2.35508	4.87103	0.0273111	0.811218	Up
ENSG00000162714	ZNF496	0.451821	4.70398	5.39643	0.0201779	0.811218	Up
ENSG00000163644	PPM1K	0.418429	5.66534	5.28629	0.0214939	0.811218	Up
ENSG00000166311	SMPD1	0.366174	5.64041	4.51647	0.03357	0.811218	Up
ENSG00000169330	MINAR1	0.792445	0.665908	5.46524	0.0193983	0.811218	Up
ENSG00000172432	GTPBP2	0.323779	6.52215	5.38357	0.0203272	0.811218	Up
ENSG00000177030	DEAF1	0.331781	4.76985	4.86361	0.0274288	0.811218	Up
ENSG00000180061	TMEM150B	0.502594	3.40392	5.09206	0.0240356	0.811218	Up
ENSG00000183785	TUBA8	0.667556	-1.09956	5.10866	0.0238067	0.811218	Up
ENSG00000187260	WDR86	0.444513	2.0715	5.91586	0.0150052	0.811218	Up
ENSG00000188290	HES4	0.956917	2.20117	5.08276	0.0241649	0.811218	Up
ENSG00000199753	SNORD104	0.829397	0.0251841	5.30575	0.0212552	0.811218	Up
ENSG00000204642	HLA-F	0.377175	8.60428	4.50453	0.0338051	0.811218	Up
ENSG00000211725	TRBV5-5	0.601523	0.929164	4.50093	0.0338764	0.811218	Up
ENSG00000243795	LINC02044	0.674134	-1.06288	4.87432	0.0272592	0.811218	Up
ENSG00000253291	TRBV7-7	0.568118	-0.586957	4.96996	0.0257912	0.811218	Up
ENSG00000255337	TMEM123-DT	0.796835	-1.23127	5.62812	0.0176746	0.811218	Up
ENSG00000277301	ENSG00000277301	0.669638	1.14922	5.10089	0.0239135	0.811218	Up
ENSG00000286061	RCAN3AS	0.472624	0.452779	5.33634	0.0208853	0.811218	Up
ENSG00000291055	ENSG00000291055	0.367268	3.59364	5.10773	0.0238194	0.811218	Up
ENSG00000023171	GRAMD1B	0.494463	4.45519	5.31264	0.0211712	0.811218	Up
ENSG00000065427	KARS1	0.31817	7.05132	4.61097	0.031768	0.811218	Up
ENSG00000088827	SIGLEC1	1.53058	5.35396	6.02408	0.014112	0.811218	Up
ENSG00000100220	RTCB	0.309885	5.73605	5.96478	0.0145944	0.811218	Up
ENSG00000100226	GTPBP1	0.342303	6.70729	5.60267	0.0179331	0.811218	Up
ENSG00000102996	MMP15	0.550981	-0.183863	4.67706	0.030568	0.811218	Up
ENSG00000112208	BAG2	0.326295	1.81657	5.30129	0.0213097	0.811218	Up
ENSG00000132622	HSPA12B	0.937197	-1.42295	4.85929	0.0274976	0.811218	Up
ENSG00000144655	CSRNP1	0.465804	5.88364	4.42786	0.0353568	0.811218	Up
ENSG00000165185	KIAA1958	0.66457	2.5705	5.31128	0.0211878	0.811218	Up
ENSG00000168394	TAP1	0.485792	8.42583	5.00557	0.0252658	0.811218	Up
ENSG00000169627	BOLA2B	1.90707	0.298305	5.83262	0.0157317	0.811218	Up
ENSG00000175287	PHYHD1	0.610647	-0.134112	5.01047	0.0251945	0.811218	Up
ENSG00000196684	HSH2D	0.415338	8.40904	4.41984	0.0355233	0.811218	Up
ENSG00000197928	ZNF677	0.527065	1.80192	4.45215	0.0348572	0.811218	Up
ENSG00000211976	IGHV3-73	0.858609	0.150096	4.6964	0.0302258	0.811218	Up
ENSG00000214401	KANSL1-AS1	0.800867	1.63616	5.52317	0.0187662	0.811218	Up
ENSG00000230266	XXYLT1-AS2	0.716445	-1.05627	5.00799	0.0252306	0.811218	Up
ENSG00000233672	RNASEH2B-AS1	0.773975	-0.779331	5.22309	0.0222889	0.811218	Up
ENSG00000275895	ENSG00000275895	1.14417	2.60964	5.4884	0.0191431	0.811218	Up
ENSG00000020577	SAMD4A	0.702018	2.57425	4.47052	0.0344844	0.811218	Up
ENSG00000105402	NAPA	0.457045	6.44497	4.93638	0.026297	0.811218	Up
ENSG00000105609	LILRB5	1.07227	2.25205	5.26171	0.0217996	0.811218	Up
ENSG00000105939	ZC3HAV1	0.481739	7.28782	5.50676	0.0189431	0.811218	Up
ENSG00000122643	NT5C3A	0.717343	5.10355	5.47365	0.0193052	0.811218	Up
ENSG00000162614	NEXN	0.697619	1.41933	4.55095	0.0329005	0.811218	Up
ENSG00000168404	MLKL	0.435657	6.78379	4.61641	0.0316675	0.811218	Up
ENSG00000174123	TLR10	0.649949	4.72491	4.77278	0.0289131	0.811218	Up
ENSG00000225131	PSME2P2	0.603851	-0.27154	4.82996	0.0279693	0.811218	Up
ENSG00000266028	SRGAP2	0.3662	5.84583	4.46715	0.0345526	0.811218	Up
ENSG00000289234	ENSG00000289234	0.559672	1.77928	4.87464	0.0272542	0.811218	Up
ENSG00000079385	CEACAM1	0.655983	5.31241	4.45692	0.0347602	0.811218	Up
ENSG00000132274	TRIM22	0.788658	8.63381	4.57776	0.0323895	0.811218	Up
ENSG00000137628	DDX60	1.11735	5.83657	5.49625	0.0190573	0.811218	Up
ENSG00000138642	HERC6	0.658244	5.02651	4.59938	0.0319836	0.811218	Up
ENSG00000139618	BRCA2	0.618535	1.658	4.90409	0.0267931	0.811218	Up
ENSG00000142089	IFITM3	0.963658	9.2992	4.48706	0.0341524	0.811218	Up
ENSG00000152229	PSTPIP2	0.514736	5.83229	4.49419	0.0340102	0.811218	Up
ENSG00000180066	LINC02870	0.777201	-0.769562	5.20752	0.0224894	0.811218	Up
ENSG00000183486	MX2	0.663483	8.79331	5.99759	0.0143255	0.811218	Up
ENSG00000279320	ENSG00000279320	0.706935	1.69508	4.52939	0.0333175	0.811218	Up
ENSG00000137757	CASP5	0.943469	3.30455	4.61829	0.0316328	0.811218	Up
ENSG00000145685	LHFPL2	0.62105	4.06434	5.43851	0.0196975	0.811218	Up
ENSG00000150337	FCGR1A	0.994115	5.2305	5.22975	0.0222037	0.811218	Up
ENSG00000163565	IFI16	0.594399	8.43769	4.44165	0.0350722	0.811218	Up
ENSG00000173821	RNF213	0.623863	9.55946	5.23142	0.0221824	0.811218	Up
ENSG00000188313	PLSCR1	0.812092	6.29691	4.50486	0.0337987	0.811218	Up
ENSG00000196116	TDRD7	0.620614	5.26176	4.7884	0.0286521	0.811218	Up
ENSG00000162542	TMCO4	0.273844	4.44054	4.40674	0.0357971	0.812487	Up
ENSG00000291208	ENSG00000291208	0.424497	1.51432	4.40852	0.0357598	0.812487	Up
ENSG00000268041	ERFL	0.517595	2.11083	4.40017	0.0359352	0.812487	Up
ENSG00000243678	NME2	0.582493	-0.495393	4.39445	0.036056	0.812951	Up
ENSG00000185522	LMNTD2	0.472044	2.1878	4.3915	0.0361185	0.813575	Up
ENSG00000167191	GPRC5B	0.681741	0.0660691	4.37717	0.0364234	0.815431	Up
ENSG00000152778	IFIT5	0.866051	5.63459	4.37348	0.0365024	0.815748	Up
ENSG00000011478	QPCTL	0.370009	2.74485	4.36072	0.0367768	0.817065	Up
ENSG00000170835	CEL	0.580772	-0.242788	4.35812	0.0368329	0.817065	Up
ENSG00000227077	ENSG00000227077	0.795761	-1.21844	4.36041	0.0367836	0.817065	Up
ENSG00000117013	KCNQ4	0.514796	-0.807905	4.35306	0.0369425	0.817712	Up
ENSG00000145287	PLAC8	0.389371	6.7264	4.3522	0.0369611	0.817712	Up
ENSG00000180817	PPA1	0.312638	4.87165	4.34428	0.0371335	0.818444	Up
ENSG00000140853	NLRC5	0.299493	8.38655	4.34176	0.0371884	0.818444	Up
ENSG00000213626	LBH	0.333271	7.94102	4.34088	0.0372076	0.818444	Up
ENSG00000272343	ENSG00000272343	0.465362	-0.170163	4.34198	0.0371836	0.818444	Up
ENSG00000125531	FNDC11	0.379049	0.578062	4.30743	0.0379463	0.819223	Up
ENSG00000005187	ACSM3	0.360216	2.60268	4.29421	0.0382424	0.819223	Up
ENSG00000104964	TLE5	0.379146	8.35329	4.32324	0.0375952	0.819223	Up
ENSG00000110844	PRPF40B	0.335903	1.04953	4.31394	0.0378012	0.819223	Up
ENSG00000112576	CCND3	0.308804	8.67791	4.3132	0.0378177	0.819223	Up
ENSG00000149582	TMEM25	0.365742	3.05778	4.30776	0.037939	0.819223	Up
ENSG00000157303	SUSD3	0.374317	5.28235	4.32523	0.0375513	0.819223	Up
ENSG00000228956	SATB1-AS1	0.403614	3.61183	4.32593	0.0375358	0.819223	Up
ENSG00000232021	LEF1-AS1	0.562734	1.97339	4.3265	0.0375234	0.819223	Up
ENSG00000286186	ENSG00000286186	0.472915	0.341007	4.31226	0.0378387	0.819223	Up
ENSG00000072310	SREBF1	0.337158	6.14863	4.30203	0.0380668	0.819223	Up
ENSG00000092068	SLC7A8	0.768958	1.60927	4.2875	0.0383936	0.819223	Up
ENSG00000124688	MAD2L1BP	0.303334	4.84309	4.30762	0.0379421	0.819223	Up
ENSG00000146904	EPHA1	0.374792	4.38995	4.28908	0.0383579	0.819223	Up
ENSG00000169136	ATF5	0.469564	3.87249	4.33181	0.0374064	0.819223	Up
ENSG00000198133	TMEM229B	0.274043	5.368	4.28676	0.0384103	0.819223	Up
ENSG00000172183	ISG20	0.475515	7.5719	4.31117	0.037863	0.819223	Up
ENSG00000177409	SAMD9L	0.842286	7.47076	4.32009	0.0376649	0.819223	Up
ENSG00000289042	ENSG00000289042	0.329139	0.935539	4.28032	0.0385561	0.819462	Up
ENSG00000198821	CD247	0.308547	7.86097	4.27852	0.038597	0.819462	Up
ENSG00000110944	IL23A	0.337291	2.35392	4.26202	0.0389735	0.819661	Up
ENSG00000140263	SORD	0.378803	4.15346	4.25249	0.0391927	0.819661	Up
ENSG00000211658	IGLV3-27	1.15881	0.399005	4.26139	0.038988	0.819661	Up
ENSG00000125245	GPR18	0.301847	3.83467	4.24357	0.0393991	0.820564	Up
ENSG00000004478	FKBP4	0.338377	5.28032	4.23059	0.0397016	0.820874	Up
ENSG00000162836	ACP6	0.296715	3.91888	4.22976	0.0397211	0.820874	Up
ENSG00000260428	SCX	0.549225	-0.582178	4.23209	0.0396666	0.820874	Up
ENSG00000138760	SCARB2	0.401956	5.4526	4.23531	0.0395915	0.820874	Up
ENSG00000079263	SP140	0.430498	5.83347	4.23032	0.039708	0.820874	Up
ENSG00000105948	TTC26	0.854572	1.98816	4.2373	0.0395451	0.820874	Up
ENSG00000099860	GADD45B	0.359041	6.1991	4.22645	0.0397985	0.821246	Up
ENSG00000280057	ENSG00000280057	0.585096	-1.57257	4.21772	0.0400039	0.821506	Up
ENSG00000204264	PSMB8	0.408875	8.02771	4.21701	0.0400207	0.821506	Up
ENSG00000262580	ENSG00000262580	0.338231	4.02093	4.21992	0.039952	0.821506	Up
ENSG00000267834	ENSG00000267834	0.643356	-2.02374	4.21087	0.0401657	0.821813	Up
ENSG00000273893	ENSG00000273893	0.47758	0.519784	4.19063	0.0406479	0.822351	Up
ENSG00000160223	ICOSLG	0.435531	2.99197	4.19425	0.0405613	0.822351	Up
ENSG00000106785	TRIM14	0.353159	6.59742	4.19203	0.0406145	0.822351	Up
ENSG00000211978	IGHV5-78	0.534793	0.69679	4.18234	0.0408473	0.823581	Up
ENSG00000108961	RANGRF	0.479833	0.368484	4.16351	0.0413038	0.823581	Up
ENSG00000204580	DDR1	0.404019	3.30026	4.16528	0.0412606	0.823581	Up
ENSG00000109084	TMEM97	0.342377	1.5659	4.16031	0.0413818	0.824298	Up
ENSG00000288836	ENSG00000288836	1.15313	0.500853	4.14768	0.0416916	0.827106	Up
ENSG00000211787	TRAV8-3	0.356949	2.45355	4.14687	0.0417116	0.827187	Up
ENSG00000087237	CETP	0.511881	2.34888	4.14426	0.041776	0.827187	Up
ENSG00000111912	NCOA7	0.520646	4.63164	4.14469	0.0417653	0.827187	Up
ENSG00000274227	ENSG00000274227	0.40802	-1.14454	4.14129	0.0418492	0.827613	Up
ENSG00000165457	FOLR2	0.498839	2.38664	4.12537	0.0422448	0.829019	Up
ENSG00000035720	STAP1	0.401678	3.08389	4.11591	0.0424817	0.829331	Up
ENSG00000187535	IFT140	0.33834	2.84576	4.10946	0.0426439	0.830496	Up
ENSG00000164054	SHISA5	0.407799	9.11031	4.10947	0.0426436	0.830496	Up
ENSG00000136682	CBWD2	0.461472	3.60022	4.10819	0.0426759	0.830861	Up
ENSG00000168056	LTBP3	0.427658	6.63011	4.09849	0.0429214	0.832351	Up
ENSG00000275395	FCGBP	0.722126	4.81134	4.0938	0.0430407	0.832887	Up
ENSG00000283498	MIR1244-2	0.450116	1.91313	4.072	0.0435997	0.83485	Up
ENSG00000127955	GNAI1	0.531051	-0.0393935	4.06384	0.0438107	0.835789	Up
ENSG00000174080	CTSF	0.457039	3.75178	4.06311	0.0438297	0.835789	Up
ENSG00000211724	TRBV6-6	0.406538	1.99691	4.06565	0.0437638	0.835789	Up
ENSG00000236397	DDX11L2	0.976356	2.11942	4.05264	0.0441023	0.837824	Up
ENSG00000108773	KAT2A	0.295529	5.83061	4.04392	0.0443309	0.839677	Up
ENSG00000272669	ENSG00000272669	0.517873	3.09735	4.0445	0.0443156	0.839677	Up
ENSG00000134716	CYP2J2	0.588737	-0.354022	4.02477	0.0448368	0.840984	Up
ENSG00000057935	MTA3	0.274507	3.75342	4.02445	0.0448453	0.840984	Up
ENSG00000089248	ERP29	0.333809	7.68247	4.02783	0.0447554	0.840984	Up
ENSG00000128342	LIF	0.699111	-1.26067	4.03046	0.0446857	0.840984	Up
ENSG00000135900	MRPL44	0.281981	4.8199	4.03688	0.0445159	0.840984	Up
ENSG00000162729	IGSF8	0.347861	5.41994	4.02256	0.0448956	0.841076	Up
ENSG00000160209	PDXK	0.272562	6.73475	4.00768	0.0452933	0.843892	Up
ENSG00000287896	ENSG00000287896	0.610528	-1.84105	4.00757	0.0452964	0.843892	Up
ENSG00000167880	EVPL	0.902581	0.749497	4.00845	0.0452727	0.843892	Up
ENSG00000111907	TPD52L1	0.575766	-1.37225	4.00008	0.0454981	0.845663	Up
ENSG00000127578	WFIKKN1	0.57968	0.806835	3.99903	0.0455263	0.845663	Up
ENSG00000169660	HEXD	0.298255	5.83219	3.99474	0.0456425	0.845811	Up
ENSG00000188511	MIR3667HG	0.342398	3.24911	3.99426	0.0456556	0.845811	Up
ENSG00000227527	ENSG00000227527	0.623715	-1.87974	3.99278	0.0456957	0.846302	Up
ENSG00000100908	EMC9	0.373137	2.77771	3.98912	0.0457949	0.846426	Up
ENSG00000288033	ENSG00000288033	0.519197	-1.50817	3.9842	0.045929	0.846545	Up
ENSG00000163093	BBS5	0.39005	0.106196	3.98431	0.045926	0.846545	Up
ENSG00000129667	RHBDF2	0.35309	6.75164	3.98364	0.0459441	0.846545	Up
ENSG00000164509	IL31RA	0.823697	0.711379	3.97094	0.046292	0.848325	Up
ENSG00000211728	TRBV5-6	0.4407	1.9514	3.96592	0.04643	0.849939	Up
ENSG00000154134	ROBO3	0.465742	3.34786	3.96487	0.0464591	0.850147	Up
ENSG00000125445	MRPS7	0.297375	4.61907	3.95942	0.0466098	0.85191	Up
ENSG00000168890	TMEM150A	0.269076	3.81809	3.95062	0.046854	0.852215	Up
ENSG00000152558	TMEM123	0.608568	8.18517	3.95101	0.0468434	0.852215	Up
ENSG00000176087	SLC35A4	0.287996	6.62868	3.94956	0.0468837	0.852374	Up
ENSG00000281404	LINC01176	0.42864	2.47983	3.93825	0.0471999	0.855216	Up
ENSG00000291144	ENSG00000291144	0.48096	3.99568	3.93404	0.0473182	0.856864	Up
ENSG00000177989	ODF3B	0.647988	6.19855	3.93008	0.0474297	0.858084	Up
ENSG00000188822	CNR2	0.29453	4.46559	3.92752	0.047502	0.858503	Up
ENSG00000197744	PTMAP2	0.349569	0.0445596	3.92107	0.0476845	0.858975	Up
ENSG00000170846	ENSG00000170846	0.301718	4.3993	3.91828	0.0477636	0.858975	Up
ENSG00000263366	ABHD17AP5	0.559086	-0.198878	3.91754	0.0477848	0.858975	Up
ENSG00000276557	TRBV18	0.402069	2.45143	3.90811	0.0480537	0.860293	Up
ENSG00000117266	CDK18	0.381564	1.98306	3.90702	0.0480848	0.860293	Up
ENSG00000230099	TRBV5-4	0.431612	2.35096	3.90185	0.0482331	0.861768	Up
ENSG00000211776	TRAV2	0.417948	1.45796	3.89049	0.0485603	0.863337	Up
ENSG00000167106	FAM102A	0.347503	7.52848	3.87774	0.0489302	0.866539	Up
ENSG00000182489	XKRX	0.700999	0.201446	3.87193	0.0491001	0.867665	Up
ENSG00000197272	IL27	0.585304	0.835942	3.86733	0.0492349	0.868546	Up
ENSG00000132386	SERPINF1	0.405609	3.59398	3.85178	0.0496932	0.871437	Up
ENSG00000102226	USP11	0.287816	5.60595	3.84929	0.0497671	0.872165	Up
ENSG00000179846	NKPD1	0.441149	-0.147455	3.84486	0.0498986	0.872599	Up
ENSG00000213928	IRF9	0.37061	5.50976	3.84489	0.0498977	0.872599	Up
ENSG00000010319	SEMA3G	-0.623515	-0.113759	4.91073	0.0266903	0.811218	Down
ENSG00000036448	MYOM2	-1.62511	4.71179	4.64707	0.0311067	0.811218	Down
ENSG00000047597	XK	-1.38399	2.68755	9.72263	0.00182013	0.490444	Down
ENSG00000050165	DKK3	-0.995848	0.586559	4.47101	0.0344747	0.811218	Down
ENSG00000065328	MCM10	-0.735117	-1.16426	4.17484	0.0410284	0.823581	Down
ENSG00000065621	GSTO2	-0.404409	0.854691	6.16611	0.0130221	0.802027	Down
ENSG00000066926	FECH	-0.775743	4.76411	5.46093	0.0194462	0.811218	Down
ENSG00000072682	P4HA2	-0.600116	-0.203846	6.32294	0.0119186	0.778332	Down
ENSG00000073792	IGF2BP2	-1.06272	4.23829	7.44054	0.00637707	0.628783	Down
ENSG00000076706	MCAM	-0.593472	-0.682161	4.58568	0.0322401	0.811218	Down
ENSG00000076770	MBNL3	-0.760671	6.44164	7.69651	0.00553276	0.59615	Down
ENSG00000076864	RAP1GAP	-1.69649	1.68786	6.85094	0.00885948	0.719061	Down
ENSG00000091136	LAMB1	-0.499185	0.808966	4.19906	0.0404465	0.822351	Down
ENSG00000111728	ST8SIA1	-0.525874	1.98713	4.57307	0.0324784	0.811218	Down
ENSG00000112212	TSPO2	-1.32526	0.486934	4.29191	0.0382941	0.819223	Down
ENSG00000112984	KIF20A	-0.62034	-0.886597	3.90769	0.0480656	0.860293	Down
ENSG00000115902	SLC1A4	-0.304961	3.52885	4.08817	0.0431843	0.83312	Down
ENSG00000116885	OSCP1	-0.525124	-0.539131	4.11552	0.0424915	0.829331	Down
ENSG00000117650	NEK2	-1.48904	-1.08341	9.85842	0.00169056	0.47867	Down
ENSG00000118689	FOXO3	-0.446652	6.29983	5.19962	0.0225919	0.811218	Down
ENSG00000119950	MXI1	-0.991813	6.43932	7.81245	0.00518875	0.58313	Down
ENSG00000120875	DUSP4	-0.619943	0.326889	4.94534	0.0261611	0.811218	Down
ENSG00000128918	ALDH1A2	-0.583099	-0.0149817	7.17847	0.00737834	0.683514	Down
ENSG00000130202	NECTIN2	-1.56833	3.36307	8.75825	0.00308205	0.520629	Down
ENSG00000133069	TMCC2	-1.32611	5.51729	4.01552	0.0450834	0.843062	Down
ENSG00000133193	FAM104A	-0.328889	4.64983	4.88396	0.0271074	0.811218	Down
ENSG00000133742	CA1	-1.95786	4.76308	6.21614	0.0126591	0.791886	Down
ENSG00000133800	LYVE1	-0.748075	0.579477	6.62516	0.0100548	0.742876	Down
ENSG00000136010	ALDH1L2	-0.551276	-1.29802	4.51554	0.0335883	0.811218	Down
ENSG00000137267	TUBB2A	-1.93514	3.78658	5.5436	0.0185484	0.811218	Down
ENSG00000145335	SNCA	-1.50376	5.81111	7.79025	0.00525288	0.587181	Down
ENSG00000148773	MKI67	-0.555302	2.67154	4.59668	0.0320339	0.811218	Down
ENSG00000164237	CMBL	-2.21099	0.808544	8.16956	0.00425993	0.548962	Down
ENSG00000169607	CKAP2L	-0.798764	-1.25756	6.06179	0.0138138	0.811218	Down
ENSG00000170231	FABP6	-1.14856	-0.277981	11.8911	0.000564035	0.309073	Down
ENSG00000171617	ENC1	-0.699361	4.24012	6.45199	0.0110828	0.762516	Down
ENSG00000172331	BPGM	-1.05161	5.17816	4.54657	0.0329847	0.811218	Down
ENSG00000172771	EFCAB12	-0.536868	2.18304	4.41779	0.0355661	0.811218	Down
ENSG00000173578	XCR1	-0.949181	0.265238	8.0198	0.00462687	0.561221	Down
ENSG00000175445	LPL	-1.53994	-0.0951434	7.24697	0.00710206	0.671025	Down
ENSG00000175711	B3GNTL1	-0.410981	4.77387	5.27864	0.0215886	0.811218	Down
ENSG00000177570	SAMD12	-0.5349	1.2493	4.43501	0.035209	0.811218	Down
ENSG00000178665	ZNF713	-0.401791	-0.389947	4.07606	0.043495	0.83468	Down
ENSG00000179082	LINC02913	-0.689498	0.419812	6.40758	0.0113634	0.767886	Down
ENSG00000179914	ITLN1	-1.19248	0.437294	4.56603	0.032612	0.811218	Down
ENSG00000182853	VMO1	-0.936537	0.329776	4.3775	0.0364165	0.815431	Down
ENSG00000183044	ABAT	-0.639243	5.0748	9.57205	0.00197562	0.512122	Down
ENSG00000183160	TMEM119	-1.19557	0.593977	9.83204	0.00171498	0.47867	Down
ENSG00000183508	TENT5C	-0.950517	6.34865	3.97645	0.0461406	0.847166	Down
ENSG00000187244	BCAM	-1.74276	0.499949	11.3077	0.000771844	0.355899	Down
ENSG00000188672	RHCE	-1.13683	0.475758	4.75896	0.0291462	0.811218	Down
ENSG00000188766	SPRED3	-0.7257	-0.933654	5.62574	0.0176986	0.811218	Down
ENSG00000189233	NUGGC	-0.673787	1.38046	7.46638	0.00628618	0.626746	Down
ENSG00000196188	CTSE	-1.00161	0.0450511	5.74197	0.0165642	0.811218	Down
ENSG00000196407	THEM5	-0.492887	2.09114	8.57657	0.00340516	0.530696	Down
ENSG00000196421	C20orf204	-1.20527	1.47323	6.15602	0.0130966	0.802609	Down
ENSG00000196517	SLC6A9	-1.37462	0.754976	5.97408	0.0145177	0.811218	Down
ENSG00000198336	MYL4	-1.27503	5.35743	6.34976	0.0117397	0.774945	Down
ENSG00000198876	DCAF12	-0.792926	7.56492	5.40023	0.0201341	0.811218	Down
ENSG00000214688	C10orf105	-0.570925	3.15735	6.61978	0.0100852	0.742876	Down
ENSG00000224596	ZMIZ1-AS1	-0.604997	-0.109241	6.87067	0.00876216	0.719061	Down
ENSG00000224903	RNF32-AS1	-0.47439	-0.416652	4.95573	0.0260043	0.811218	Down
ENSG00000225695	HNRNPA1P35	-0.461941	-0.266037	4.86156	0.0274614	0.811218	Down
ENSG00000226321	CROCC2	-0.624855	1.56686	4.37825	0.0364004	0.815431	Down
ENSG00000227355	ENSG00000227355	-0.979779	-0.63709	7.26303	0.00703884	0.668796	Down
ENSG00000229000	SEPTIN7P8	-0.706153	-2.05895	4.03254	0.0446307	0.840984	Down
ENSG00000229337	ENSG00000229337	-0.760827	-1.138	6.72666	0.00949823	0.727284	Down
ENSG00000229419	RALGAPA1P1	-0.520164	0.871795	4.74266	0.0294235	0.811218	Down
ENSG00000230426	LINC01036	-1.06604	1.4519	9.43205	0.00213225	0.520629	Down
ENSG00000235092	ID2-AS1	-0.5846	-0.101649	6.19315	0.0128245	0.795477	Down
ENSG00000235978	ENSG00000235978	-0.55442	-0.783944	4.76817	0.0289906	0.811218	Down
ENSG00000239300	ENSG00000239300	-0.644327	-1.1396	4.53358	0.033236	0.811218	Down
ENSG00000240563	L1TD1	-1.28689	-0.731301	6.44901	0.0111014	0.762516	Down
ENSG00000240583	AQP1	-1.33574	1.27561	8.34004	0.00387807	0.536852	Down
ENSG00000242324	ENSG00000242324	-0.65524	0.500797	8.21378	0.00415735	0.545432	Down
ENSG00000242732	RTL5	-0.401119	2.55111	3.87861	0.0489052	0.86634	Down
ENSG00000246203	ENSG00000246203	-0.619022	1.14734	4.24468	0.0393735	0.820381	Down
ENSG00000250361	GYPB	-1.72563	1.65677	6.93453	0.00845471	0.715512	Down
ENSG00000253307	ENSG00000253307	-0.709204	-1.24086	3.9904	0.0457602	0.846426	Down
ENSG00000255491	ENSG00000255491	-0.640319	-0.884848	4.28146	0.0385302	0.819462	Down
ENSG00000256020	ENSG00000256020	-1.50341	1.46366	4.67438	0.0306157	0.811218	Down
ENSG00000260660	ENSG00000260660	-0.868155	0.33909	6.60851	0.0101493	0.744398	Down
ENSG00000263011	ENSG00000263011	-0.482202	-0.490733	4.29459	0.0382338	0.819223	Down
ENSG00000267934	ENSG00000267934	-0.690835	-0.632335	4.89726	0.0268993	0.811218	Down
ENSG00000269924	ENSG00000269924	-0.732606	-1.28918	11.4808	0.000703179	0.339142	Down
ENSG00000273032	ENSG00000273032	-0.520927	0.510094	4.45179	0.0348647	0.811218	Down
ENSG00000278599	TBC1D3E	-1.58302	0.780398	10.2666	0.00135459	0.43032	Down
ENSG00000284879	ENSG00000284879	-0.776481	-0.441665	4.57304	0.0324789	0.811218	Down
ENSG00000288741	ENSG00000288741	-0.536681	-0.0506188	4.73433	0.0295663	0.811218	Down
ENSG00000288887	ENSG00000288887	-0.460766	2.59718	4.44077	0.0350905	0.811218	Down
ENSG00000289439	ENSG00000289439	-1.4105	1.07045	7.10031	0.00770705	0.685086	Down
ENSG00000289486	ENSG00000289486	-0.916353	-1.76884	12.1622	0.000487688	0.294067	Down
ENSG00000289548	ENSG00000289548	-0.92171	0.621762	4.73353	0.0295801	0.811218	Down
ENSG00000289887	ENSG00000289887	-0.944225	-0.654281	4.18638	0.0407501	0.82258	Down
ENSG00000291174	ENSG00000291174	-0.402316	0.91758	5.42684	0.0198295	0.811218	Down
ENSG00000004939	SLC4A1	-1.30533	7.84671	4.5261	0.0333817	0.811218	Down
ENSG00000011028	MRC2	-0.706144	3.29677	4.00455	0.0453775	0.844148	Down
ENSG00000016391	CHDH	-0.891166	-1.10704	7.14974	0.0074975	0.684295	Down
ENSG00000029534	ANK1	-0.906276	4.80305	3.84548	0.0498803	0.872599	Down
ENSG00000048342	CC2D2A	-0.61386	2.16011	4.80855	0.0283188	0.811218	Down
ENSG00000049759	NEDD4L	-0.588252	2.69506	4.53287	0.0332498	0.811218	Down
ENSG00000060138	YBX3	-1.02201	8.47602	6.72073	0.00952987	0.727284	Down
ENSG00000070182	SPTB	-1.07186	3.73401	4.55991	0.0327288	0.811218	Down
ENSG00000075073	TACR2	-0.955665	-1.61057	5.99624	0.0143364	0.811218	Down
ENSG00000079308	TNS1	-1.24921	6.05619	4.65328	0.0309943	0.811218	Down
ENSG00000082146	STRADB	-1.13796	7.1703	5.06695	0.0243863	0.811218	Down
ENSG00000087903	RFX2	-0.545706	5.13746	4.76948	0.0289686	0.811218	Down
ENSG00000100225	FBXO7	-0.758936	9.55023	3.95958	0.0466054	0.85191	Down
ENSG00000102230	PCYT1B	-0.707466	0.308684	4.26639	0.0388734	0.819661	Down
ENSG00000103381	CPPED1	-0.363823	9.13943	3.94921	0.0468935	0.852374	Down
ENSG00000105610	KLF1	-1.2704	3.71568	4.94553	0.0261582	0.811218	Down
ENSG00000123473	STIL	-0.489226	0.622287	3.97233	0.0462537	0.848117	Down
ENSG00000124098	FAM210B	-0.988637	7.58638	6.47244	0.010956	0.762496	Down
ENSG00000125772	GPCPD1	-0.417309	7.55396	5.7617	0.0163792	0.811218	Down
ENSG00000128254	YWHAH-AS1	-0.627842	-0.654203	6.17048	0.01299	0.801772	Down
ENSG00000130821	SLC6A8	-1.09963	5.14049	6.01198	0.0142091	0.811218	Down
ENSG00000131969	ABHD12B	-0.593409	1.44795	5.56284	0.0183457	0.811218	Down
ENSG00000134779	TPGS2	-0.50944	5.73473	5.56631	0.0183093	0.811218	Down
ENSG00000135083	CCNJL	-0.433066	6.16233	4.07906	0.0434179	0.83468	Down
ENSG00000136842	TMOD1	-1.20227	2.89677	7.77004	0.00531198	0.589583	Down
ENSG00000137261	KIAA0319	-0.669089	2.80588	4.96582	0.025853	0.811218	Down
ENSG00000137285	TUBB2B	-1.05401	-0.24944	4.41961	0.0355281	0.811218	Down
ENSG00000137507	LRRC32	-0.535303	-0.668557	3.97492	0.0461825	0.84731	Down
ENSG00000141519	CCDC40	-0.701951	-1.72442	4.82237	0.0280927	0.811218	Down
ENSG00000142621	FHAD1	-0.593373	-0.641132	4.16878	0.0411755	0.823581	Down
ENSG00000142945	KIF2C	-0.405647	0.528987	4.07723	0.0434648	0.83468	Down
ENSG00000143416	SELENBP1	-1.3725	6.32506	5.51298	0.0188759	0.811218	Down
ENSG00000145284	SCD5	-0.937217	0.648352	6.33893	0.0118116	0.777236	Down
ENSG00000147454	SLC25A37	-0.496838	10.7616	4.69947	0.030172	0.811218	Down
ENSG00000151090	THRB	-0.827059	-0.905056	7.48375	0.00622584	0.626681	Down
ENSG00000154263	ABCA10	-0.483167	-0.263225	4.11792	0.0424312	0.829331	Down
ENSG00000154330	PGM5	-1.22833	2.79209	4.85985	0.0274888	0.811218	Down
ENSG00000157578	LCA5L	-0.651473	-0.671121	6.27358	0.0122551	0.780527	Down
ENSG00000158023	CFAP251	-0.412888	-0.134431	4.05317	0.0440885	0.837824	Down
ENSG00000158578	ALAS2	-1.36793	8.99552	5.1897	0.0227211	0.811218	Down
ENSG00000159346	ADIPOR1	-0.679918	9.21888	5.14469	0.0233176	0.811218	Down
ENSG00000160224	AIRE	-0.806742	1.82596	4.33263	0.0373885	0.819223	Down
ENSG00000162722	TRIM58	-1.21565	6.5683	4.94977	0.0260941	0.811218	Down
ENSG00000163449	TMEM169	-0.366247	1.71607	8.92933	0.00280627	0.520629	Down
ENSG00000164849	GPR146	-0.686782	1.4831	4.83036	0.0279628	0.811218	Down
ENSG00000166446	CDYL2	-0.38292	3.0749	3.95827	0.0466417	0.851995	Down
ENSG00000166947	EPB42	-1.32403	4.64499	5.36531	0.0205411	0.811218	Down
ENSG00000168038	ULK4	-0.394878	2.16721	4.87408	0.027263	0.811218	Down
ENSG00000169877	AHSP	-1.39937	5.26391	4.53461	0.0332161	0.811218	Down
ENSG00000171552	BCL2L1	-0.990909	7.56232	6.02815	0.0140795	0.811218	Down
ENSG00000173212	MAB21L3	-0.675159	-0.25563	4.45211	0.0348581	0.811218	Down
ENSG00000174871	CNIH2	-0.451849	0.10467	4.73517	0.0295519	0.811218	Down
ENSG00000177602	HASPIN	-0.61868	-0.860216	6.41607	0.0113092	0.766702	Down
ENSG00000184792	OSBP2	-1.05487	5.25929	5.0866	0.0241115	0.811218	Down
ENSG00000185010	F8	-0.335437	2.08165	4.02733	0.0447688	0.840984	Down
ENSG00000186642	PDE2A	-0.421152	0.751322	4.47065	0.0344819	0.811218	Down
ENSG00000189238	LINC00943	-0.800613	0.61257	5.40053	0.0201306	0.811218	Down
ENSG00000196914	ARHGEF12	-0.54909	4.51377	3.89577	0.048408	0.86314	Down
ENSG00000197467	COL13A1	-1.39107	1.05789	7.01669	0.00807533	0.696567	Down
ENSG00000197721	CR1L	-0.754158	0.335698	3.90706	0.0480836	0.860293	Down
ENSG00000197993	KEL	-0.809689	2.15991	4.17331	0.0410656	0.823581	Down
ENSG00000198580	ENSG00000198580	-0.69873	-1.76227	4.79514	0.0285401	0.811218	Down
ENSG00000198682	PAPSS2	-0.364631	2.66102	3.97734	0.0461164	0.847166	Down
ENSG00000204010	IFIT1B	-1.03395	3.14021	4.81439	0.0282231	0.811218	Down
ENSG00000205181	LINC00654	-0.570503	1.24235	4.75443	0.0292229	0.811218	Down
ENSG00000211452	DIO1	-0.64893	-1.03155	6.40005	0.0114117	0.769484	Down
ENSG00000213025	COX20P1	-1.40656	-0.317637	5.31895	0.0210948	0.811218	Down
ENSG00000221930	DENND10P1	-0.460318	1.74446	6.32804	0.0118843	0.778332	Down
ENSG00000223609	HBD	-1.50042	4.54474	4.01192	0.0451797	0.843521	Down
ENSG00000224177	LINC00570	-1.22751	1.88564	4.44955	0.0349105	0.811218	Down
ENSG00000225402	ENSG00000225402	-0.904496	0.144889	5.0725	0.0243083	0.811218	Down
ENSG00000230076	RPL10P6	-1.0733	2.35205	4.32782	0.0374941	0.819223	Down
ENSG00000232626	ENSG00000232626	-0.945528	-1.34998	4.4219	0.0354805	0.811218	Down
ENSG00000233822	H2BC15	-0.455575	0.489252	5.14273	0.023344	0.811218	Down
ENSG00000234719	NPIPB2	-1.1953	-0.102953	5.48326	0.0191995	0.811218	Down
ENSG00000235105	ENSG00000235105	-1.05895	2.91379	5.00425	0.0252852	0.811218	Down
ENSG00000236349	SUCLG2P2	-0.703284	-1.42872	7.58689	0.00587942	0.612456	Down
ENSG00000238005	ENSG00000238005	-0.580211	2.2792	4.63435	0.0313379	0.811218	Down
ENSG00000238243	OR2W3	-1.28948	3.74182	6.80177	0.00910677	0.719252	Down
ENSG00000238287	EXO5-DT	-0.643275	-1.43628	4.16366	0.0413001	0.823581	Down
ENSG00000244734	HBB	-0.8371	16.1711	3.89049	0.0485601	0.863337	Down
ENSG00000245888	NSMCE1-DT	-0.629228	-0.262583	4.19046	0.040652	0.822351	Down
ENSG00000248727	LINC01948	-0.639651	2.87422	5.92096	0.0149618	0.811218	Down
ENSG00000250274	ENSG00000250274	-0.613542	-0.318786	4.9396	0.0262481	0.811218	Down
ENSG00000250492	INTS6P1	-0.564665	-0.884374	5.08104	0.0241889	0.811218	Down
ENSG00000251259	ENSG00000251259	-0.437443	2.09122	4.77058	0.02895	0.811218	Down
ENSG00000253214	ENSG00000253214	-0.735897	-1.10196	4.09745	0.042948	0.832351	Down
ENSG00000254363	ENSG00000254363	-0.493404	0.751154	3.92391	0.047604	0.858975	Down
ENSG00000254481	PTP4A2P2	-0.822429	-0.0975166	7.04926	0.00792979	0.688937	Down
ENSG00000258732	ENSG00000258732	-0.750611	-0.648916	4.36258	0.0367366	0.816934	Down
ENSG00000260075	NSFP1	-0.836579	0.363871	6.73223	0.00946861	0.727284	Down
ENSG00000261055	ENSG00000261055	-0.757706	-1.85141	4.67164	0.0306647	0.811218	Down
ENSG00000261614	YBX3P1	-0.995804	1.12068	5.59222	0.0180404	0.811218	Down
ENSG00000266274	RN7SL138P	-0.69994	-1.20137	4.14231	0.041824	0.827613	Down
ENSG00000267248	ENSG00000267248	-0.400899	-0.387966	3.91824	0.0477648	0.858975	Down
ENSG00000270959	LPP-AS2	-0.421693	0.358377	6.90846	0.00857887	0.719061	Down
ENSG00000271913	TAGAP-AS1	-0.449357	2.90849	4.28653	0.0384154	0.819223	Down
ENSG00000276523	ENSG00000276523	-0.403922	0.660537	4.11759	0.0424394	0.829331	Down
ENSG00000278828	H3C10	-0.641213	4.05954	4.66597	0.030766	0.811218	Down
ENSG00000286342	ENSG00000286342	-0.864577	0.394372	4.23108	0.0396903	0.820874	Down
ENSG00000286607	ENSG00000286607	-0.670303	-1.88727	4.06084	0.0438887	0.835792	Down
ENSG00000286830	ENSG00000286830	-0.931892	-0.142553	3.8744	0.0490279	0.867665	Down
ENSG00000287975	ENSG00000287975	-0.505863	-0.485716	6.3859	0.0115031	0.769484	Down
ENSG00000289727	ENSG00000289727	-0.444986	0.252001	5.31893	0.0210949	0.811218	Down
ENSG00000072952	IRAG1	-0.552859	6.3929	6.49059	0.0108447	0.758162	Down
ENSG00000095739	BAMBI	-0.787518	-1.18745	5.00512	0.0252724	0.811218	Down
ENSG00000166831	RBPMS2	-1.09016	0.563035	4.64912	0.0310695	0.811218	Down
ENSG00000214279	SCART1	-0.66376	3.14832	3.84985	0.0497505	0.872165	Down
ENSG00000227719	ENSG00000227719	-0.458638	-0.596114	4.27522	0.038672	0.819661	Down
ENSG00000258102	MAP1LC3B2	-0.344733	2.75631	5.51261	0.0188798	0.811218	Down
ENSG00000258744	ENSG00000258744	-0.41438	0.130656	3.92888	0.0474636	0.858259	Down
ENSG00000271425	NBPF10	-0.435436	3.96145	5.1663	0.0230292	0.811218	Down
ENSG00000290563	ENSG00000290563	-0.99514	2.12707	5.71678	0.0168035	0.811218	Down

## Sheet: S2
Table S2. GO and KEGG enrichment analysis using 546 up-regulated genes between CON and non-Responders (Fig.2A(ii))
Category	ID	Term	Count	PValue	FDR	Fold Enrichment	Genes
GOTERM_BP_DIRECT	GO:0051607	defense response to virus	42	6.90502e-26	1.36029e-22	8.47316	IRF7, IL23A, ISG15, DDX60, SHFL, CXCL9, OAS2, TRIM22, IRF9, RTP4, ZC3HAV1, OAS3, TRIM5, IFITM3, IFIT2, OAS1, EIF2AK2, IFI16, ZBP1, ISG20, BST2, GBP5, MOV10, STAT2, IFI44L, IFIT5, RSAD2, UNC93B1, HERC5, GBP1, IFIH1, MX1, OASL, IFI6, PLSCR1, IFIT3, MX2, NLRC5, IFIT1, NT5C3A, DDIT4, MLKL
GOTERM_BP_DIRECT	GO:0045071	negative regulation of viral genome replication	18	1.75728e-17	1.73092e-14	18.7883	ISG20, ISG15, BST2, SHFL, IFIT5, RSAD2, OAS2, ZC3HAV1, OAS3, IFIH1, MX1, OASL, IFITM3, PLSCR1, OAS1, EIF2AK2, IFIT1, IFI16
GOTERM_BP_DIRECT	GO:0009615	response to virus	23	8.40319e-16	5.51809e-13	10.0394	IRF7, ISG20, ISG15, BST2, DDX60, RSAD2, IFI44, OAS2, TRIM22, ZC3HAV1, OAS3, IFIH1, MX1, OASL, SMPD1, IFITM3, IFIT2, OAS1, EIF2AK2, IFIT3, MX2, DHX58, IFIT1
GOTERM_BP_DIRECT	GO:0045087	innate immune response	41	2.82315e-12	1.3904e-09	3.67276	IRF7, IL23A, TRIM14, IL27, UBE2L6, ISG15, SERPING1, DDX60, SHFL, OAS2, TRIM22, ZC3HAV1, OAS3, TRIM5, N4BP3, OAS1, HLA-B, APOL1, IFI16, PML, ISG20, IFI35, PARP14, BST2, TLR10, GBP5, IFIT5, RSAD2, UNC93B1, HERC5, GBP1, FCGR1A, IL34, IFIH1, MX1, OASL, IFI6, DHX58, MX2, NLRC5, UBA7
GOTERM_BP_DIRECT	GO:0140374	antiviral innate immune response	11	2.03898e-07	8.03359e-05	9.43144	USP18, IFIT2, CXCL10, OAS1, EIF2AK2, DHX58, IFIT3, IFIT1, ZBP1, MX1, IFIH1
GOTERM_BP_DIRECT	GO:0007166	cell surface receptor signaling pathway	20	4.63048e-05	0.0152034	2.99156	LY6E, VIPR1, TRBV7-7, TRBV6-2, TNK2, TRBV6-6, TRBV5-5, FCGR1A, CD247, TRBV5-6, IRF9, LILRB5, TRBV18, ADGRE1, TRBV7-2, EPHA1, CXCL10, CD274, TRBV5-4, MLKL
GOTERM_BP_DIRECT	GO:0006952	defense response	10	6.74919e-05	0.0188919	5.64878	SP140, STAT2, IL31RA, HLA-B, TAP1, CXCL9, ICOSLG, MX2, LILRB5, MX1
GOTERM_BP_DIRECT	GO:0035455	response to interferon-alpha	5	7.96345e-05	0.0188919	20.0061	IFITM3, BST2, LAMP3, EIF2AK2, MX2
GOTERM_BP_DIRECT	GO:0060700	regulation of ribonuclease activity	4	8.63082e-05	0.0188919	38.4117	OAS1, OAS2, OAS3, OASL
GOTERM_BP_DIRECT	GO:0060339	negative regulation of type I interferon-mediated signaling pathway	6	0.0001159	0.0228323	12.0036	USP18, ISG15, STAT2, OAS1, NLRC5, OAS3
GOTERM_BP_DIRECT	GO:0032020	ISG15-protein conjugation	4	0.000169951	0.0304367	32.0097	UBE2L6, ISG15, HERC5, UBA7
GOTERM_BP_DIRECT	GO:0032728	positive regulation of interferon-beta production	7	0.000215973	0.0354556	8.00243	IRF7, ISG15, OAS1, OAS2, ZC3HAV1, OAS3, IFIH1
GOTERM_BP_DIRECT	GO:0070106	interleukin-27-mediated signaling pathway	4	0.000292828	0.0443747	27.4369	OAS1, OAS2, MX1, OASL
GOTERM_BP_DIRECT	GO:0006955	immune response	24	0.000398367	0.056056	2.28188	CCR7, LIF, TLR10, TRAV2, IGLV10-54, IFI44L, IGLV3-27, CXCL9, IFI44, FCGR1A, TRIM22, CD7, EXOSC9, IFITM3, IFI6, HLA-F, TNFSF10, CD274, GTPBP1, HLA-B, TNFSF13B, RGS1, CNR2, IL17B
GOTERM_BP_DIRECT	GO:0002250	adaptive immune response	22	0.000542056	0.07119	2.33699	IL4I1, TRAV8-3, TRAV2, TRBV7-7, TRBV6-2, IGLV10-54, TAP1, IGLV3-27, TRBV6-6, TRBV5-5, CD247, CD7, TRBV5-6, LILRB5, TRBV18, ADGRE1, TRBV7-2, LAMP3, CD274, HLA-B, ICOSLG, TRBV5-4
GOTERM_BP_DIRECT	GO:0034340	response to type I interferon	4	0.000681307	0.083886	21.3398	SMPD1, ISG15, SHFL, MX1
GOTERM_BP_DIRECT	GO:1900246	positive regulation of RIG-I signaling pathway	4	0.00129746	0.150353	17.4599	DDX60, DHX58, ZC3HAV1, OASL
GOTERM_BP_DIRECT	GO:0061014	positive regulation of mRNA catabolic process	4	0.00170341	0.176616	16.0049	PNPT1, MOV10, GTPBP1, ZC3HAV1
GOTERM_BP_DIRECT	GO:0035456	response to interferon-beta	4	0.00170341	0.176616	16.0049	IFITM3, BST2, PLSCR1, SHFL
GOTERM_BP_DIRECT	GO:0039530	MDA-5 signaling pathway	3	0.00251307	0.23575	36.0109	IRF7, OAS3, IFIH1
GOTERM_BP_DIRECT	GO:0061035	regulation of cartilage development	3	0.00251307	0.23575	36.0109	SCX, SMPD3, KAT2A
GOTERM_BP_DIRECT	GO:0060337	type I interferon-mediated signaling pathway	6	0.00310499	0.278038	6.00182	IRF7, IFITM3, STAT2, OAS1, OAS2, IFIH1
GOTERM_BP_DIRECT	GO:0006401	RNA catabolic process	5	0.00416741	0.356948	7.50228	EXOSC9, ISG20, PNPT1, OAS2, RNASEH2B
GOTERM_BP_DIRECT	GO:0042771	intrinsic apoptotic signaling pathway in response to DNA damage by p53 class mediator	5	0.00466567	0.382974	7.27494	BRCA2, SHISA5, IFI16, DDIT4, PML
GOTERM_BP_DIRECT	GO:0061098	positive regulation of protein tyrosine kinase activity	4	0.00780429	0.614978	9.60292	EFNA1, FCGR1A, GPRC5B, IL34
GOTERM_BP_DIRECT	GO:0006869	lipid transport	7	0.0100575	0.762046	3.81934	STOML1, APOL4, CETP, APOL6, GM2A, APOL1, SPNS3
GOTERM_BP_DIRECT	GO:0007165	signal transduction	39	0.0106576	0.777609	1.51014	IL23A, IL27, HSH2D, CXCL9, CHRNB1, SMPD1, KIR2DL4, CEACAM1, APBB1, CXCL10, CD274, GTPBP1, GNA11, PSD, TNFSF13B, RANGAP1, RGS1, SFRP5, IL17B, MOB3C, LGALS3BP, P2RX6, STAT2, CCND3, TNK2, SOX8, TNFRSF10D, FCGR1A, MDK, SRGAP2, MX1, ADORA3, TLE2, RHOH, TNFSF10, AGRN, ICOSLG, TNFAIP6, OLFM2
GOTERM_BP_DIRECT	GO:0009617	response to bacterium	8	0.0121889	0.855903	3.22787	USP18, TRAV2, TMEM229B, RGS1, DHX58, IFI44, NLRC5, HERC6
GOTERM_BP_DIRECT	GO:0032735	positive regulation of interleukin-12 production	5	0.0129517	0.855903	5.4562	IDO1, IL23A, CCR7, UNC93B1, MDK
GOTERM_BP_DIRECT	GO:0032693	negative regulation of interleukin-10 production	4	0.013034	0.855903	8.00243	IDO1, IL23A, DLL1, CD274
GOTERM_BP_DIRECT	GO:0006954	inflammatory response	17	0.0156441	0.993946	1.93424	IDO1, IL23A, TRIM14, IL27, CCR7, TLR10, GBP5, CXCL9, IL34, SIGLEC1, ADORA3, CXCL10, CNR2, TNFAIP6, FOLR2, IFI16, IL17B
GOTERM_BP_DIRECT	GO:0042742	defense response to bacterium	9	0.0195032	0.993946	2.68405	ISG15, GBP5, OAS1, OAS2, FCGR1A, PLAC8, GBP1, OAS3, RNF213
GOTERM_BP_DIRECT	GO:0034341	response to type II interferon	4	0.0198505	0.993946	6.85923	IFITM3, BST2, SHFL, NUB1
GOTERM_BP_DIRECT	GO:1904861	excitatory synapse assembly	3	0.0247646	0.993946	12.0036	SRGAP2C, SRGAP2, WNT7A
GOTERM_BP_DIRECT	GO:0042058	regulation of epidermal growth factor receptor signaling pathway	3	0.0247646	0.993946	12.0036	CEACAM1, IFI6, RHBDF2
GOTERM_BP_DIRECT	GO:0002376	immune system process	5	0.0256943	0.993946	4.4458	IRF7, PSMB8, IRF9, IFIH1, RNF213
GOTERM_BP_DIRECT	GO:0032091	negative regulation of protein binding	5	0.0256943	0.993946	4.4458	IFIT2, TLE5, BAG2, IFIT1, PEX14
GOTERM_BP_DIRECT	GO:0060325	face morphogenesis	4	0.0282871	0.993946	6.00182	CSRNP1, MYH3, NOG, SCX
GOTERM_BP_DIRECT	GO:0031397	negative regulation of protein ubiquitination	5	0.0323367	0.993946	4.13919	BEX4, ISG15, BAG2, MINAR1, DNAJA1
GOTERM_BP_DIRECT	GO:0002218	activation of innate immune response	4	0.0331118	0.993946	5.64878	GBP5, IFI16, TRIM5, ZBP1
GOTERM_BP_DIRECT	GO:0002230	positive regulation of defense response to virus by host	4	0.0356743	0.993946	5.48738	IL23A, IL27, TRIM22, PML
GOTERM_BP_DIRECT	GO:0019060	intracellular transport of viral protein in host cell	2	0.041122	0.993946	48.0146	IFIT1, DYNLT1
GOTERM_BP_DIRECT	GO:0061512	protein localization to cilium	4	0.0439531	0.993946	5.05417	TTC21A, DZIP1L, IFT140, TTC26
GOTERM_BP_DIRECT	GO:0051591	response to cAMP	4	0.0439531	0.993946	5.05417	PNPT1, AANAT, SREBF1, PER1
GOTERM_BP_DIRECT	GO:0048144	fibroblast proliferation	4	0.0469069	0.993946	4.92457	LIF, CD248, RNASEH2B, KAT2A
KEGG_PATHWAY	hsa05164	Influenza A	15	1.56969e-05	0.00397133	4.10069	IRF7, STAT2, CCND3, RSAD2, OAS2, IRF9, OAS3, IFIH1, MX1, TNFSF10, CXCL10, OAS1, EIF2AK2, MX2, PML
KEGG_PATHWAY	hsa05169	Epstein-Barr virus infection	15	9.81604e-05	0.0124173	3.47448	IRF7, ISG15, STAT2, CCND3, TAP1, GADD45B, OAS2, CD247, IRF9, OAS3, HLA-F, CXCL10, OAS1, HLA-B, EIF2AK2
KEGG_PATHWAY	hsa05162	Measles	12	0.000167919	0.0141612	4.05939	IRF7, STAT2, OAS1, EIF2AK2, CCND3, MX2, OAS2, IRF9, HSPA8, OAS3, MX1, IFIH1
KEGG_PATHWAY	hsa05160	Hepatitis C	12	0.00053833	0.0340494	3.54878	IRF7, CXCL10, STAT2, OAS1, EIF2AK2, RSAD2, MX2, OAS2, IFIT1, IRF9, OAS3, MX1
KEGG_PATHWAY	hsa04621	NOD-like receptor signaling pathway	11	0.00671174	0.339614	2.73669	IRF7, GBP5, STAT2, OAS1, OAS2, CASP5, GBP1, IRF9, IFI16, OAS3, GBP4
KEGG_PATHWAY	hsa05165	Human papillomavirus infection	15	0.0109851	0.437047	2.11808	ISG15, STAT2, CCND3, PPP2R3B, HES4, TUBG2, IRF9, ATP6V1G1, WNT7A, MX1, OASL, HLA-F, HLA-B, EIF2AK2, MX2
KEGG_PATHWAY	hsa05171	Coronavirus disease - COVID-19	12	0.0120922	0.437047	2.37082	ISG15, CXCL10, STAT2, OAS1, EIF2AK2, RPS23, MX2, OAS2, IRF9, OAS3, MX1, IFIH1
KEGG_PATHWAY	hsa03250	Viral life cycle - HIV-1	5	0.0439585	0.996063	3.73185	BST2, MX2, TRIM5, MX1, KAT2A

## Sheet: S3
Table S3. GO and KEGG enrichment analysis using 208 down-regulated genes between CON and non-Responders (Fig.2A(iii))
Category	ID	Term	Count	PValue	FDR	Fold Enrichment	Genes
GOTERM_BP_DIRECT	GO:0015670	carbon dioxide transport	3	0.00333891	1	34.1025	HBB, HBD, AQP1
GOTERM_BP_DIRECT	GO:0015671	oxygen transport	3	0.00436725	1	29.8397	HBB, BPGM, HBD
GOTERM_BP_DIRECT	GO:0030218	erythrocyte differentiation	4	0.00514964	1	11.3675	AHSP, FECH, KLF1, ALAS2
GOTERM_BP_DIRECT	GO:0048821	erythrocyte development	3	0.00820444	1	21.7016	SLC4A1, BPGM, ALAS2
GOTERM_BP_DIRECT	GO:0019934	cGMP-mediated signaling	3	0.00894943	1	20.7581	IRAG1, PDE2A, AQP1
GOTERM_BP_DIRECT	GO:0051179	localization	3	0.0149574	1	15.9145	OSBP2, ANK1, SNCA
GOTERM_BP_DIRECT	GO:0006936	muscle contraction	4	0.0161102	1	7.48918	SLC6A8, MYOM2, TMOD1, TACR2
GOTERM_BP_DIRECT	GO:0006417	regulation of translation	4	0.0227957	1	6.56269	FOXO3, B3GNTL1, IGF2BP2, AIRE
GOTERM_BP_DIRECT	GO:0031133	regulation of axon diameter	2	0.0247013	1	79.5726	XK, KEL
GOTERM_BP_DIRECT	GO:0006865	amino acid transport	3	0.0307444	1	10.8508	SLC6A8, XK, SLC1A4
GOTERM_BP_DIRECT	GO:0010961	intracellular magnesium ion homeostasis	2	0.0307815	1	63.6581	XK, KEL
GOTERM_BP_DIRECT	GO:0020027	hemoglobin metabolic process	2	0.0307815	1	63.6581	AHSP, EPB42
GOTERM_BP_DIRECT	GO:0030185	nitric oxide transport	2	0.0307815	1	63.6581	HBB, AQP1
GOTERM_BP_DIRECT	GO:0046985	positive regulation of hemoglobin biosynthetic process	2	0.0368241	1	53.0484	SLC6A9, SLC25A37
GOTERM_BP_DIRECT	GO:0040012	regulation of locomotion	2	0.0428293	1	45.47	FBXO7, SNCA
GOTERM_BP_DIRECT	GO:0009566	fertilization	3	0.0431988	1	9.00822	YBX3, NECTIN2, BCL2L1
GOTERM_BP_DIRECT	GO:0070474	positive regulation of uterine smooth muscle contraction	2	0.0487973	1	39.7863	ABAT, TACR2
KEGG_PATHWAY	hsa00260	Glycine, serine and threonine metabolism	3	0.0373491	1	9.65417	CHDH, BPGM, ALAS2

## Sheet: S4
Table S4. List of genes with significant changes in RNA expression between CON and Responders (1,720 up-regulated and 342 down-regulated genes) (Fig.2B(i))
Ensembl	symbol	logFC	logCPM	LR	PValue	FDR	DEG
ENSG00000002330	BAD	0.451957	2.94282	5.07472	0.0242771	0.440898	Up
ENSG00000002586	CD99	0.309104	7.38549	4.86403	0.0274221	0.441127	Up
ENSG00000002822	MAD1L1	0.579427	3.17272	7.21681	0.0072224	0.339302	Up
ENSG00000004059	ARF5	0.286683	6.89237	3.84711	0.0498318	0.543744	Up
ENSG00000004142	POLDIP2	0.269487	5.86256	5.06815	0.0243694	0.441127	Up
ENSG00000004478	FKBP4	0.302857	5.28032	5.49321	0.0190905	0.395335	Up
ENSG00000004777	ARHGAP33	0.362445	3.33059	7.2225	0.00719953	0.339302	Up
ENSG00000004779	NDUFAB1	0.284676	4.3656	5.39976	0.0201396	0.405052	Up
ENSG00000004838	ZMYND10	0.45175	1.43506	6.6559	0.00988278	0.358864	Up
ENSG00000005075	POLR2J	0.345016	5.28815	4.52571	0.0333892	0.456998	Up
ENSG00000005189	REXO5	0.340588	0.477897	4.43246	0.0352616	0.465038	Up
ENSG00000005381	MPO	0.580958	3.0807	4.21358	0.0401017	0.4913	Up
ENSG00000005448	WDR54	0.361139	3.63185	4.32546	0.0375462	0.476326	Up
ENSG00000006015	REX1BD	0.553486	5.57489	6.91505	0.00854735	0.346116	Up
ENSG00000006025	OSBPL7	0.274198	5.10203	4.64033	0.031229	0.450377	Up
ENSG00000006118	TMEM132A	0.998293	-1.08119	6.97979	0.00824354	0.342073	Up
ENSG00000006534	ALDH3B1	0.370445	6.24325	6.88968	0.00866947	0.347166	Up
ENSG00000007047	MARK4	0.301706	5.04088	5.25652	0.0218647	0.420852	Up
ENSG00000007080	CCDC124	0.463245	5.12737	5.48498	0.0191806	0.395835	Up
ENSG00000007129	CEACAM21	0.317044	4.54563	4.90356	0.0268014	0.441127	Up
ENSG00000007255	TRAPPC6A	0.553885	4.78917	8.40567	0.00374052	0.296634	Up
ENSG00000007376	RPUSD1	0.492482	4.98863	6.53387	0.010584	0.3648	Up
ENSG00000007520	TSR3	0.511274	4.87591	7.13063	0.00757783	0.339302	Up
ENSG00000007541	PIGQ	0.462501	4.98296	6.73352	0.00946176	0.353393	Up
ENSG00000007968	E2F2	0.652077	4.5191	4.47772	0.0343394	0.460795	Up
ENSG00000008018	PSMB1	0.296164	6.45594	4.41124	0.0357028	0.466698	Up
ENSG00000008382	MPND	0.539941	3.22822	9.36488	0.00221183	0.293467	Up
ENSG00000008394	MGST1	0.472223	3.73872	10.0049	0.00156125	0.272793	Up
ENSG00000008438	PGLYRP1	0.600148	5.39002	4.14473	0.0417644	0.497785	Up
ENSG00000008735	MAPK8IP2	0.607954	-0.780559	9.11644	0.00253323	0.296541	Up
ENSG00000010256	UQCRC1	0.502646	6.8096	9.03573	0.00264754	0.296541	Up
ENSG00000010327	STAB1	0.475409	7.24312	7.62468	0.00575749	0.31536	Up
ENSG00000010610	CD4	0.276361	8.59046	5.15717	0.0231506	0.430411	Up
ENSG00000011009	LYPLA2	0.426882	6.45145	6.94848	0.00838905	0.344066	Up
ENSG00000011478	QPCTL	0.326114	2.74485	5.43577	0.0197284	0.400858	Up
ENSG00000011600	TYROBP	0.503246	9.73474	5.59133	0.0180495	0.387216	Up
ENSG00000012061	ERCC1	0.316004	5.4363	5.79156	0.0161033	0.371812	Up
ENSG00000012211	PRICKLE3	0.282732	3.38294	7.93716	0.00484299	0.303098	Up
ENSG00000012223	LTF	1.28673	5.93803	9.00477	0.00269276	0.296541	Up
ENSG00000014216	CAPN1	0.265795	7.61708	5.23584	0.0221262	0.422586	Up
ENSG00000019169	MARCO	0.735428	3.59308	4.7989	0.0284778	0.441127	Up
ENSG00000019582	CD74	0.328393	11.8529	4.10573	0.0427382	0.503739	Up
ENSG00000023191	RNH1	0.434697	7.2967	8.92118	0.00281882	0.296541	Up
ENSG00000025434	NR1H3	0.498926	2.86375	9.28328	0.00231255	0.296541	Up
ENSG00000025708	TYMP	0.525031	8.72363	6.12827	0.0133037	0.3648	Up
ENSG00000025770	NCAPH2	0.353811	5.48451	6.11039	0.0134389	0.3648	Up
ENSG00000030582	GRN	0.394024	9.49513	5.52776	0.0187171	0.392953	Up
ENSG00000032389	EIPR1	0.271551	4.33211	4.32141	0.0376357	0.476795	Up
ENSG00000032444	PNPLA6	0.374147	7.13724	8.70203	0.00317855	0.296634	Up
ENSG00000033050	ABCF2	0.296657	3.82566	8.27617	0.00401688	0.296634	Up
ENSG00000034510	TMSB10	0.506555	9.78505	6.69763	0.00965413	0.35498	Up
ENSG00000036565	SLC18A1	0.703721	-0.379737	4.68561	0.0304162	0.446514	Up
ENSG00000039523	RIPOR1	0.26348	6.33003	5.49997	0.0190168	0.394251	Up
ENSG00000040487	SLC66A1	0.283208	3.77482	4.35526	0.0368948	0.473126	Up
ENSG00000041988	THAP3	0.38842	4.03979	7.74068	0.00539906	0.312339	Up
ENSG00000042493	CAPG	0.732421	7.2929	10.882	0.000971009	0.239072	Up
ENSG00000042753	AP2S1	0.582173	6.13688	8.53233	0.00348892	0.296634	Up
ENSG00000048162	NOP16	0.265419	2.99706	8.80951	0.00299665	0.296634	Up
ENSG00000049089	COL9A2	0.377261	4.77323	4.43794	0.0351486	0.464329	Up
ENSG00000051128	HOMER3	0.397421	3.19052	4.58065	0.032335	0.45627	Up
ENSG00000051523	CYBA	0.476235	9.80714	5.81962	0.0158484	0.369324	Up
ENSG00000053371	AKR7A2	0.495786	4.93307	7.64353	0.00569763	0.314247	Up
ENSG00000053501	USE1	0.345708	3.87415	4.13414	0.0420263	0.499805	Up
ENSG00000054148	PHPT1	0.663896	3.35126	9.84226	0.00170548	0.278443	Up
ENSG00000055955	ITIH4	0.314674	-0.236507	4.3641	0.0367039	0.472725	Up
ENSG00000055957	ITIH1	0.52547	-0.522343	6.37177	0.011595	0.3648	Up
ENSG00000059122	FLYWCH1	0.354201	6.31416	4.00299	0.0454196	0.518904	Up
ENSG00000060491	OGFR	0.294577	7.51125	4.1271	0.0422015	0.501033	Up
ENSG00000060558	GNA15	0.396522	4.80495	5.5523	0.0184565	0.390751	Up
ENSG00000060656	PTPRU	0.908352	-0.931086	5.14177	0.0233568	0.432584	Up
ENSG00000061938	TNK2	0.270168	7.83669	7.80872	0.00519947	0.307936	Up
ENSG00000063177	RPL18	0.526549	9.63942	5.50334	0.0189802	0.393861	Up
ENSG00000063241	ISOC2	0.429294	3.53033	4.52408	0.0334209	0.457032	Up
ENSG00000063245	EPN1	0.425947	6.89328	7.19764	0.00729996	0.339302	Up
ENSG00000063660	GPC1	0.397591	-0.0265643	4.82773	0.0280055	0.441127	Up
ENSG00000063761	ADCK1	0.400068	3.5013	4.80814	0.0283256	0.441127	Up
ENSG00000064490	RFXANK	0.407697	5.12941	5.41467	0.0199682	0.403458	Up
ENSG00000064545	TMEM161A	0.414628	3.90896	7.19722	0.00730165	0.339302	Up
ENSG00000065057	NTHL1	0.521918	3.07201	7.60278	0.00582783	0.317015	Up
ENSG00000065268	WDR18	0.45259	4.43105	5.91737	0.0149923	0.3648	Up
ENSG00000065989	PDE4A	0.379592	4.21714	7.85714	0.00506204	0.304543	Up
ENSG00000067225	PKM	0.309124	9.34859	4.97407	0.0257301	0.441127	Up
ENSG00000067829	IDH3G	0.45778	6.04903	8.09551	0.00443751	0.301168	Up
ENSG00000067836	ROGDI	0.435908	4.40856	4.68275	0.0304669	0.446514	Up
ENSG00000070404	FSTL3	0.570914	2.77198	8.24759	0.00408063	0.296634	Up
ENSG00000071462	BUD23	0.319009	4.93558	6.31018	0.0120047	0.3648	Up
ENSG00000071553	ATP6AP1	0.264699	7.43548	5.355	0.020663	0.409217	Up
ENSG00000071655	MBD3	0.536609	5.46811	8.1921	0.00420732	0.296784	Up
ENSG00000071859	FAM50A	0.486978	5.70029	7.9064	0.00492601	0.304234	Up
ENSG00000072135	PTPN18	0.265464	7.94929	4.49744	0.0339455	0.458871	Up
ENSG00000072506	HSD17B10	0.45276	5.56952	5.93826	0.0148157	0.3648	Up
ENSG00000073169	SELENOO	0.426969	5.81527	6.16094	0.0130602	0.3648	Up
ENSG00000074071	MRPS34	0.486816	5.25448	7.10683	0.00767907	0.339601	Up
ENSG00000074800	ENO1	0.371599	9.39404	6.46135	0.0110246	0.3648	Up
ENSG00000074842	MYDGF	0.417152	5.0971	6.31353	0.011982	0.3648	Up
ENSG00000074964	ARHGEF10L	0.342155	4.93849	7.34996	0.00670642	0.333128	Up
ENSG00000076924	XAB2	0.30907	6.38463	6.62885	0.010034	0.360622	Up
ENSG00000076944	STXBP2	0.513988	5.51853	7.33525	0.00676152	0.334661	Up
ENSG00000077312	SNRPA	0.492242	5.18921	7.15444	0.00747786	0.339302	Up
ENSG00000077348	EXOSC5	0.408806	4.19002	6.65761	0.00987334	0.358864	Up
ENSG00000077463	SIRT6	0.411157	4.91775	5.89944	0.0151457	0.364976	Up
ENSG00000077800	FKBP6	0.507273	-1.70941	4.20152	0.0403879	0.492939	Up
ENSG00000078061	ARAF	0.346837	6.95576	5.57807	0.0181868	0.388188	Up
ENSG00000078814	MYH7B	0.372279	1.56144	4.54803	0.0329567	0.456731	Up
ENSG00000079462	PAFAH1B3	0.504625	3.14163	6.65865	0.00986756	0.358864	Up
ENSG00000080189	SLC35C2	0.269021	6.63403	5.23833	0.0220944	0.422579	Up
ENSG00000081692	JMJD4	0.319732	2.40357	3.97534	0.046171	0.522815	Up
ENSG00000084207	GSTP1	0.678255	7.5951	11.1239	0.000852233	0.235972	Up
ENSG00000084623	EIF3I	0.306288	6.51589	4.86773	0.0273635	0.441127	Up
ENSG00000085265	FCN1	0.427497	10.4851	8.72519	0.00313843	0.296634	Up
ENSG00000085662	AKR1B1	0.309124	5.97975	4.25494	0.0391364	0.486085	Up
ENSG00000086504	MRPL28	0.508557	5.77773	6.9085	0.00857869	0.34663	Up
ENSG00000086544	ITPKC	0.314035	4.37329	6.34145	0.0117948	0.3648	Up
ENSG00000087077	TRIP6	0.327346	3.28654	3.937	0.0472349	0.529266	Up
ENSG00000087088	BAX	0.492662	6.2765	8.6513	0.00326827	0.296634	Up
ENSG00000087191	PSMC5	0.425557	6.24422	8.21749	0.00414885	0.296634	Up
ENSG00000088833	NSFL1C	0.295386	7.13536	4.6092	0.0318008	0.454167	Up
ENSG00000089248	ERP29	0.375663	7.68247	8.28681	0.00399341	0.296634	Up
ENSG00000089327	FXYD5	0.512867	8.62029	7.84101	0.00510739	0.305896	Up
ENSG00000089692	LAG3	0.478199	3.24599	4.51052	0.0336869	0.458259	Up
ENSG00000089693	MLF2	0.323776	7.62113	4.21438	0.0400826	0.491222	Up
ENSG00000089820	ARHGAP4	0.344175	8.9903	5.52161	0.018783	0.393007	Up
ENSG00000089847	ANKRD24	0.651083	0.607631	11.0884	0.000868675	0.235972	Up
ENSG00000090006	LTBP4	0.278751	5.55508	4.17523	0.0410191	0.495377	Up
ENSG00000090097	PCBP4	0.416527	3.64629	6.53253	0.0105919	0.3648	Up
ENSG00000090266	NDUFB2	0.37612	4.23449	5.51561	0.0188475	0.393319	Up
ENSG00000090273	NUDC	0.338917	6.10862	5.79599	0.0160627	0.371812	Up
ENSG00000090372	STRN4	0.269169	7.07106	5.01856	0.025077	0.441127	Up
ENSG00000090581	GNPTG	0.27422	5.65661	7.14378	0.00752244	0.339302	Up
ENSG00000090659	CD209	0.677728	-0.474815	8.50424	0.0035432	0.296634	Up
ENSG00000090971	NAT14	0.477307	1.79584	5.22076	0.0223188	0.423484	Up
ENSG00000091181	IL5RA	0.671551	4.13716	6.2566	0.0123732	0.3648	Up
ENSG00000091640	SPAG7	0.440913	4.90093	8.62731	0.0033116	0.296634	Up
ENSG00000091947	TMEM101	0.310356	4.72336	4.43478	0.0352137	0.46474	Up
ENSG00000092067	CEBPE	0.929463	3.78055	14.4369	0.000144938	0.173858	Up
ENSG00000093010	COMT	0.314334	5.20575	7.43707	0.00638939	0.328425	Up
ENSG00000095059	DHPS	0.403212	3.25802	6.79591	0.0091367	0.350896	Up
ENSG00000095380	NANS	0.277444	4.72921	5.71766	0.0167951	0.377364	Up
ENSG00000095906	NUBP2	0.39577	5.75056	5.27029	0.0216924	0.419597	Up
ENSG00000099203	TMED1	0.322696	2.75996	4.63983	0.031238	0.450377	Up
ENSG00000099330	OCEL1	0.432471	4.50326	7.23755	0.00713945	0.338409	Up
ENSG00000099337	KCNK6	0.386222	5.8623	10.2786	0.00134582	0.260859	Up
ENSG00000099341	PSMD8	0.356182	6.58548	5.85314	0.0155493	0.367267	Up
ENSG00000099377	HSD3B7	0.965573	0.931943	16.5368	4.77e-05	0.119685	Up
ENSG00000099385	BCL7C	0.447327	3.76444	4.70055	0.0301529	0.445713	Up
ENSG00000099624	ATP5F1D	0.601774	6.02252	7.23085	0.00716612	0.338904	Up
ENSG00000099795	NDUFB7	0.64267	5.25793	6.8581	0.00882402	0.34863	Up
ENSG00000099797	TECR	0.422426	5.89852	5.03545	0.0248336	0.441127	Up
ENSG00000099800	TIMM13	0.540451	4.39646	7.21363	0.0072352	0.339302	Up
ENSG00000099817	POLR2E	0.369784	7.03324	5.89475	0.0151861	0.365153	Up
ENSG00000099821	POLRMT	0.270364	5.92374	4.47365	0.0344214	0.460796	Up
ENSG00000099849	RASSF7	0.548729	5.281	8.23384	0.00411165	0.296634	Up
ENSG00000099899	TRMT2A	0.344153	5.73691	6.06294	0.0138048	0.3648	Up
ENSG00000099949	LZTR1	0.280182	4.59322	4.197	0.0404955	0.49367	Up
ENSG00000099956	SMARCB1	0.312563	5.56402	6.27152	0.0122694	0.3648	Up
ENSG00000099957	P2RX6	0.661986	-0.264499	8.09285	0.00444401	0.301168	Up
ENSG00000100029	PES1	0.379463	5.41164	7.27251	0.00700178	0.336908	Up
ENSG00000100075	SLC25A1	0.532162	5.1462	7.98045	0.00472853	0.302888	Up
ENSG00000100092	SH3BP1	0.405677	5.30944	5.69177	0.0170446	0.378897	Up
ENSG00000100097	LGALS1	0.577314	7.36542	6.13174	0.0132777	0.3648	Up
ENSG00000100138	SNU13	0.281105	6.52188	5.35844	0.0206222	0.408988	Up
ENSG00000100142	POLR2F	0.342826	4.37337	4.07423	0.043542	0.508325	Up
ENSG00000100151	PICK1	0.364256	4.36415	6.45771	0.0110472	0.3648	Up
ENSG00000100209	HSCB	0.308813	1.96127	5.62176	0.0177389	0.384253	Up
ENSG00000100243	CYB5R3	0.273869	6.17422	4.86136	0.0274647	0.441127	Up
ENSG00000100258	LMF2	0.318933	7.11451	4.75939	0.029139	0.441127	Up
ENSG00000100284	TOM1	0.382245	6.89762	5.67241	0.0172338	0.37984	Up
ENSG00000100292	HMOX1	0.299612	6.66799	5.06809	0.0243702	0.441127	Up
ENSG00000100294	MCAT	0.343671	2.66858	5.2156	0.0223852	0.423845	Up
ENSG00000100297	MCM5	0.300435	6.02697	6.32558	0.0119008	0.3648	Up
ENSG00000100300	TSPO	0.572099	8.12834	6.83394	0.00894418	0.34863	Up
ENSG00000100314	CABP7	0.604347	-0.302136	6.03258	0.0140442	0.3648	Up
ENSG00000100316	RPL3	0.418536	10.7381	4.67412	0.0306203	0.447175	Up
ENSG00000100319	ZMAT5	0.371881	3.49428	5.78574	0.0161567	0.371812	Up
ENSG00000100347	SAMM50	0.338497	5.03609	6.39464	0.0114465	0.3648	Up
ENSG00000100348	TXN2	0.397623	5.94756	4.86157	0.0274614	0.441127	Up
ENSG00000100379	KCTD17	0.334054	4.11972	5.12071	0.0236419	0.43452	Up
ENSG00000100399	CHADL	0.622151	-1.26115	5.57457	0.0182232	0.388699	Up
ENSG00000100401	RANGAP1	0.328571	6.46533	7.68992	0.00555301	0.312503	Up
ENSG00000100417	PMM1	0.359031	3.99104	6.86914	0.00876968	0.34863	Up
ENSG00000100429	HDAC10	0.274231	1.25483	4.021	0.044937	0.516495	Up
ENSG00000100448	CTSG	1.08644	1.53351	4.30376	0.0380282	0.479153	Up
ENSG00000100577	GSTZ1	0.383262	2.8811	5.16877	0.0229966	0.429201	Up
ENSG00000100599	RIN3	0.288248	8.24727	4.37711	0.0364247	0.470483	Up
ENSG00000100726	TELO2	0.280743	5.55545	5.25557	0.0218767	0.420901	Up
ENSG00000100804	PSMB5	0.286199	4.73778	5.77789	0.016229	0.371838	Up
ENSG00000100908	EMC9	0.346863	2.77771	5.53422	0.0186481	0.392376	Up
ENSG00000100949	RABGGTA	0.318638	5.08595	5.25798	0.0218463	0.420852	Up
ENSG00000100983	GSS	0.274513	4.93575	5.225	0.0222644	0.42337	Up
ENSG00000100997	ABHD12	0.389113	4.55226	8.74513	0.0031043	0.296634	Up
ENSG00000101182	PSMA7	0.300598	6.96588	6.54721	0.0105049	0.3648	Up
ENSG00000101199	ARFGAP1	0.283066	6.96476	5.79718	0.0160519	0.371804	Up
ENSG00000101220	C20orf27	0.734847	5.74379	13.8128	0.000201955	0.174171	Up
ENSG00000101246	ARFRP1	0.387345	6.01576	6.30294	0.0120538	0.3648	Up
ENSG00000101294	HM13	0.316663	7.25097	5.54836	0.018498	0.390775	Up
ENSG00000101365	IDH3B	0.367208	6.40194	6.40443	0.0113836	0.3648	Up
ENSG00000101400	SNTA1	0.486664	2.69075	6.03365	0.0140357	0.3648	Up
ENSG00000101425	BPI	0.693758	3.34024	4.0038	0.0453977	0.518748	Up
ENSG00000101439	CST3	0.630918	8.79248	9.51066	0.00204281	0.291695	Up
ENSG00000101460	MAP1LC3A	0.635766	3.91123	6.23544	0.0125219	0.3648	Up
ENSG00000101473	ACOT8	0.314151	4.45471	6.11422	0.0134099	0.3648	Up
ENSG00000101940	WDR13	0.314359	5.88217	4.1314	0.0420945	0.500425	Up
ENSG00000101945	SUV39H1	0.361296	3.40008	6.42247	0.0112685	0.3648	Up
ENSG00000101986	ABCD1	0.327942	5.21457	5.15448	0.0231865	0.430603	Up
ENSG00000101997	CCDC22	0.392482	5.24271	9.16443	0.00246764	0.296541	Up
ENSG00000102003	SYP	0.274364	1.13885	4.22755	0.0397727	0.488929	Up
ENSG00000102007	PLP2	0.346846	6.97176	5.23601	0.022124	0.422586	Up
ENSG00000102030	NAA10	0.470875	4.90674	6.01131	0.0142144	0.3648	Up
ENSG00000102032	RENBP	0.569026	5.25819	10.628	0.00111389	0.252365	Up
ENSG00000102103	PQBP1	0.422272	5.52434	5.21366	0.0224102	0.424062	Up
ENSG00000102109	PCSK1N	0.833093	1.91578	5.31783	0.0211082	0.413668	Up
ENSG00000102125	TAFAZZIN	0.374023	6.41161	6.76096	0.00931736	0.351983	Up
ENSG00000102265	TIMP1	0.515036	7.35673	5.56471	0.018326	0.390229	Up
ENSG00000102575	ACP5	0.424088	5.2609	4.27972	0.0385697	0.482391	Up
ENSG00000102878	HSF4	0.55325	2.59588	7.56962	0.00593604	0.319253	Up
ENSG00000102879	CORO1A	0.278402	10.8844	4.8854	0.0270847	0.441127	Up
ENSG00000102890	ELMO3	0.436097	3.33859	7.04212	0.00796147	0.3401	Up
ENSG00000102901	CENPT	0.300317	5.65732	4.35254	0.0369537	0.473126	Up
ENSG00000102977	ACD	0.387533	4.96666	6.27855	0.0122208	0.3648	Up
ENSG00000102981	PARD6A	0.400475	2.405	4.10717	0.0427018	0.503671	Up
ENSG00000103024	NME3	0.57294	4.95224	8.6451	0.00327943	0.296634	Up
ENSG00000103056	SMPD3	0.573717	3.71853	7.81945	0.00516869	0.307936	Up
ENSG00000103145	HCFC1R1	0.547008	3.8323	7.07754	0.0078056	0.339989	Up
ENSG00000103152	MPG	0.334521	3.96984	4.5332	0.0332433	0.456797	Up
ENSG00000103154	NECAB2	0.679103	3.55031	4.73975	0.0294733	0.441955	Up
ENSG00000103174	NAGPA	0.344816	4.83979	8.95726	0.00276369	0.296541	Up
ENSG00000103187	COTL1	0.300317	10.3905	4.98109	0.0256258	0.441127	Up
ENSG00000103245	CIAO3	0.52189	4.69805	7.83935	0.00511209	0.305896	Up
ENSG00000103253	HAGHL	0.51177	3.04338	4.36094	0.036772	0.473092	Up
ENSG00000103254	ANTKMT	0.509468	3.53908	4.89175	0.0269854	0.441127	Up
ENSG00000103266	STUB1	0.396479	4.45682	6.62583	0.010051	0.360622	Up
ENSG00000103355	PRSS33	1.16571	4.26844	13.3684	0.000255897	0.185388	Up
ENSG00000103363	ELOB	0.514229	6.73554	4.55063	0.0329065	0.456731	Up
ENSG00000103415	HMOX2	0.349432	6.30495	5.1794	0.0228563	0.428204	Up
ENSG00000103490	PYCARD	0.57616	6.43707	7.08575	0.00776993	0.339944	Up
ENSG00000103507	BCKDK	0.403869	6.06421	5.79135	0.0161052	0.371812	Up
ENSG00000103811	CTSH	0.465497	7.45028	9.20263	0.00241668	0.296541	Up
ENSG00000104129	DNAJC17	0.363695	3.57282	8.34998	0.00385692	0.296634	Up
ENSG00000104142	VPS18	0.279573	5.65117	4.41142	0.0356991	0.466698	Up
ENSG00000104518	GSDMD	0.388863	7.51622	5.71492	0.0168213	0.377681	Up
ENSG00000104679	R3HCC1	0.373673	4.74462	6.25299	0.0123984	0.3648	Up
ENSG00000104774	MAN2B1	0.28832	7.3105	5.54806	0.0185012	0.390775	Up
ENSG00000104823	ECH1	0.480374	5.82912	8.09007	0.00445084	0.301168	Up
ENSG00000104825	NFKBIB	0.265957	5.26717	4.52458	0.0334114	0.457032	Up
ENSG00000104863	LIN7B	0.388836	1.31016	3.87731	0.0489429	0.538367	Up
ENSG00000104866	PPP1R37	0.307681	4.74014	4.59434	0.0320777	0.455627	Up
ENSG00000104870	FCGRT	0.460115	9.09503	5.78224	0.0161889	0.371838	Up
ENSG00000104872	PIH1D1	0.379415	5.78055	6.61203	0.0101292	0.361734	Up
ENSG00000104883	PEX11G	0.683323	0.294002	9.72385	0.00181892	0.286666	Up
ENSG00000104884	ERCC2	0.299775	4.06261	4.73904	0.0294856	0.441955	Up
ENSG00000104886	PLEKHJ1	0.471344	5.63927	7.95602	0.00479278	0.303047	Up
ENSG00000104894	CD37	0.28887	9.009	4.1598	0.0413942	0.496977	Up
ENSG00000104897	SF3A2	0.417885	6.27459	6.15062	0.0131366	0.3648	Up
ENSG00000104907	TRMT1	0.36402	5.81537	5.23779	0.0221013	0.422579	Up
ENSG00000104915	STX10	0.392383	7.02827	4.60134	0.031947	0.454904	Up
ENSG00000104918	RETN	1.01328	2.78722	9.72414	0.00181863	0.286666	Up
ENSG00000104951	IL4I1	0.624692	1.35387	12.2486	0.000465606	0.202844	Up
ENSG00000104964	TLE5	0.304218	8.35329	4.5016	0.0338632	0.458871	Up
ENSG00000104969	SGTA	0.331982	6.07898	5.80931	0.0159415	0.370806	Up
ENSG00000104976	SNAPC2	0.431109	4.16996	7.15092	0.00749254	0.339302	Up
ENSG00000104979	C19orf53	0.535208	5.44504	6.2051	0.0127383	0.3648	Up
ENSG00000104980	TIMM44	0.335296	4.5628	7.37221	0.00662394	0.332677	Up
ENSG00000104983	CCDC61	0.339137	3.90813	5.241	0.0220606	0.422579	Up
ENSG00000105088	OLFM2	0.38527	3.60129	6.59982	0.0101989	0.361751	Up
ENSG00000105131	EPHX3	0.607913	-1.86742	4.63494	0.0313273	0.450478	Up
ENSG00000105135	ILVBL	0.301454	4.65117	4.44486	0.0350065	0.463721	Up
ENSG00000105193	RPS16	0.462945	9.11273	4.53763	0.0331575	0.456731	Up
ENSG00000105197	TIMM50	0.348317	4.77014	6.72274	0.00951911	0.354059	Up
ENSG00000105202	FBL	0.423948	6.75722	4.95528	0.0260112	0.441127	Up
ENSG00000105204	DYRK1B	0.399059	4.61954	6.98184	0.0082341	0.342073	Up
ENSG00000105205	CLC	1.1359	6.87644	14.2388	0.000161019	0.173858	Up
ENSG00000105220	GPI	0.437137	6.9064	8.79136	0.00302661	0.296634	Up
ENSG00000105223	PLD3	0.440491	6.88986	9.25634	0.00234682	0.296541	Up
ENSG00000105227	PRX	0.362274	2.78924	7.79797	0.0052305	0.307936	Up
ENSG00000105248	YJU2	0.41504	4.47907	5.79955	0.0160303	0.371804	Up
ENSG00000105254	TBCB	0.409204	6.09738	5.35416	0.0206729	0.409217	Up
ENSG00000105258	POLR2I	0.733501	1.08871	7.95348	0.0047995	0.303047	Up
ENSG00000105321	CCDC9	0.355623	5.30308	5.86646	0.015432	0.366292	Up
ENSG00000105329	TGFB1	0.312556	8.60809	4.50619	0.0337723	0.458839	Up
ENSG00000105341	DMAC2	0.297968	4.95664	5.62519	0.0177042	0.384244	Up
ENSG00000105364	MRPL4	0.370054	3.83444	5.69838	0.0169806	0.378897	Up
ENSG00000105366	SIGLEC8	0.963981	3.57604	11.287	0.000780522	0.232369	Up
ENSG00000105372	RPS19	0.4926	9.69184	5.22919	0.0222108	0.422978	Up
ENSG00000105373	NOP53	0.436799	9.06832	4.09581	0.0429897	0.505496	Up
ENSG00000105379	ETFB	0.378058	3.98227	4.62938	0.0314289	0.451112	Up
ENSG00000105393	BABAM1	0.397614	4.64301	4.39199	0.0361081	0.46871	Up
ENSG00000105401	CDC37	0.331668	7.37273	6.41497	0.0113162	0.3648	Up
ENSG00000105404	RABAC1	0.498756	3.36454	6.26334	0.0123262	0.3648	Up
ENSG00000105427	CNFN	0.702681	-0.264915	6.08188	0.0136575	0.3648	Up
ENSG00000105438	KDELR1	0.324844	5.9096	8.84418	0.00294024	0.296541	Up
ENSG00000105443	CYTH2	0.310305	5.85531	7.8584	0.00505852	0.304543	Up
ENSG00000105447	GRWD1	0.296127	4.83335	6.83277	0.00895002	0.34863	Up
ENSG00000105479	ODAD1	0.516273	0.789879	6.02831	0.0140782	0.3648	Up
ENSG00000105516	DBP	0.280085	4.97561	4.17197	0.0410979	0.495774	Up
ENSG00000105518	TMEM205	0.680773	3.81418	9.50522	0.00204888	0.291695	Up
ENSG00000105519	CAPS	0.468525	4.55678	6.35795	0.0116857	0.3648	Up
ENSG00000105552	BCAT2	0.3908	4.08185	5.72115	0.0167617	0.377154	Up
ENSG00000105556	MIER2	0.279749	3.94394	5.90662	0.0150841	0.3648	Up
ENSG00000105568	PPP2R1A	0.283131	7.44744	4.78765	0.0286645	0.441127	Up
ENSG00000105617	LENG1	0.297607	3.71061	4.58187	0.0323119	0.456266	Up
ENSG00000105618	PRPF31	0.337529	4.73813	4.5161	0.0335772	0.457601	Up
ENSG00000105619	TFPT	0.476866	3.49543	6.7947	0.00914289	0.350896	Up
ENSG00000105640	RPL18A	0.502363	9.74265	3.90224	0.0482219	0.534486	Up
ENSG00000105669	COPE	0.563282	6.92414	7.89412	0.00495959	0.304543	Up
ENSG00000105671	DDX49	0.391981	5.35202	5.29413	0.0213974	0.41633	Up
ENSG00000105676	ARMC6	0.329584	4.75585	6.80956	0.00906709	0.349691	Up
ENSG00000105677	TMEM147	0.504275	4.59874	7.9388	0.00483859	0.303098	Up
ENSG00000105726	ATP13A1	0.294772	6.70602	6.10097	0.0135107	0.3648	Up
ENSG00000105755	ETHE1	0.48969	3.99794	6.50915	0.0107321	0.3648	Up
ENSG00000105771	SMG9	0.331863	5.30882	7.25463	0.00707183	0.337577	Up
ENSG00000105963	ADAP1	0.635162	5.12829	9.00472	0.00269283	0.296541	Up
ENSG00000106077	ABHD11	0.491766	3.77888	7.01927	0.00806371	0.340981	Up
ENSG00000106266	SNX8	0.324543	4.30801	5.90726	0.0150786	0.3648	Up
ENSG00000106268	NUDT1	0.546191	3.55706	6.32344	0.0119152	0.3648	Up
ENSG00000106330	MOSPD3	0.35709	3.51879	4.15436	0.0415273	0.497518	Up
ENSG00000106333	PCOLCE	0.297437	2.18745	3.85599	0.0495687	0.541721	Up
ENSG00000106336	FBXO24	0.520027	-0.570405	5.15962	0.0231179	0.430313	Up
ENSG00000106367	AP1S1	0.32051	3.5194	4.24733	0.0393121	0.486533	Up
ENSG00000106400	ZNHIT1	0.471806	5.74911	6.67602	0.00977187	0.357314	Up
ENSG00000106605	BLVRA	0.50092	5.19124	6.83242	0.00895179	0.34863	Up
ENSG00000106628	POLD2	0.373598	5.21408	5.52898	0.018704	0.392909	Up
ENSG00000106991	ENG	0.392159	4.72334	8.99496	0.00270726	0.296541	Up
ENSG00000107175	CREB3	0.293284	4.57587	4.83719	0.0278523	0.441127	Up
ENSG00000107223	EDF1	0.521083	7.39197	6.81941	0.00901722	0.34863	Up
ENSG00000107281	NPDC1	0.498054	4.56293	5.58628	0.0181017	0.387426	Up
ENSG00000107338	SHB	0.693399	-0.778678	10.2306	0.00138131	0.260859	Up
ENSG00000107738	VSIR	0.322095	10.6762	4.42799	0.0353541	0.46552	Up
ENSG00000107872	FBXL15	0.57117	4.19868	6.93406	0.00845695	0.345302	Up
ENSG00000107874	CUEDC2	0.457491	5.27607	7.17837	0.00737877	0.339302	Up
ENSG00000107902	LHPP	0.387508	4.69907	4.96675	0.0258392	0.441127	Up
ENSG00000107954	NEURL1	0.435125	3.61915	7.27133	0.00700639	0.336908	Up
ENSG00000108107	RPL28	0.516144	10.0702	5.01656	0.025106	0.441127	Up
ENSG00000108298	RPL19	0.403071	10.1054	4.1238	0.042284	0.501819	Up
ENSG00000108479	GALK1	0.56666	5.07491	8.51049	0.00353106	0.296634	Up
ENSG00000108518	PFN1	0.416283	10.0014	5.89044	0.0152233	0.365356	Up
ENSG00000108523	RNF167	0.303735	7.71921	5.31686	0.0211201	0.413758	Up
ENSG00000108528	SLC25A11	0.366402	5.99136	6.54481	0.0105191	0.3648	Up
ENSG00000108622	ICAM2	0.277379	5.43795	3.9254	0.047562	0.531041	Up
ENSG00000108639	SYNGR2	0.330595	7.52557	6.54774	0.0105017	0.3648	Up
ENSG00000108679	LGALS3BP	0.534726	5.42724	5.14174	0.0233572	0.432584	Up
ENSG00000108784	NAGLU	0.309391	4.47802	4.90479	0.0267824	0.441127	Up
ENSG00000108798	ABI3	0.409847	6.23537	7.49754	0.00617834	0.324124	Up
ENSG00000108826	MRPL27	0.405874	3.83742	6.10324	0.0134935	0.3648	Up
ENSG00000108828	VAT1	0.275997	5.46495	4.95731	0.0259806	0.441127	Up
ENSG00000108961	RANGRF	0.395043	0.368484	4.41391	0.0356471	0.466589	Up
ENSG00000109099	PMP22	0.510081	0.7973	4.23819	0.0395243	0.487778	Up
ENSG00000109113	RAB34	0.345147	3.97851	4.77659	0.0288491	0.441127	Up
ENSG00000109736	MFSD10	0.476056	6.31776	8.96254	0.00275572	0.296541	Up
ENSG00000110057	UNC93B1	0.341459	7.46189	4.41811	0.0355595	0.466005	Up
ENSG00000110442	COMMD9	0.336985	5.59789	5.97236	0.0145318	0.3648	Up
ENSG00000110446	SLC15A3	0.398595	6.81873	5.26732	0.0217295	0.420184	Up
ENSG00000110492	MDK	0.477793	1.11043	4.71899	0.0298313	0.443947	Up
ENSG00000110628	SLC22A18	0.520286	5.05601	6.82351	0.00899654	0.34863	Up
ENSG00000110651	CD81	0.276714	7.01114	4.78933	0.0286366	0.441127	Up
ENSG00000110711	AIP	0.45193	6.755	7.05763	0.00789283	0.339989	Up
ENSG00000110717	NDUFS8	0.468526	5.39008	6.13114	0.0132821	0.3648	Up
ENSG00000110811	P3H3	0.655883	1.52042	8.45247	0.00364549	0.296634	Up
ENSG00000111057	KRT18	0.594431	1.29329	7.34937	0.00670862	0.333128	Up
ENSG00000111186	WNT5B	0.661324	0.73838	9.99946	0.00156586	0.272793	Up
ENSG00000111639	MRPL51	0.432194	4.53563	7.06219	0.00787279	0.339989	Up
ENSG00000111640	GAPDH	0.340849	9.65129	4.58283	0.0322939	0.456218	Up
ENSG00000111642	CHD4	0.401569	4.42874	5.80348	0.0159945	0.371487	Up
ENSG00000111669	TPI1	0.422294	8.30321	6.87709	0.00873074	0.348568	Up
ENSG00000111676	ATN1	0.286143	5.03924	5.82779	0.0157749	0.368847	Up
ENSG00000111716	LDHB	0.348587	3.31781	4.83376	0.0279077	0.441127	Up
ENSG00000112514	CUTA	0.501829	6.26349	5.9971	0.0143294	0.3648	Up
ENSG00000112561	TFEB	0.366083	7.00519	5.89178	0.0152117	0.36535	Up
ENSG00000112619	PRPH2	0.601647	-1.16848	5.18166	0.0228265	0.427962	Up
ENSG00000112667	DNPH1	0.529502	3.47706	4.87311	0.0272783	0.441127	Up
ENSG00000112759	SLC29A1	0.978168	4.86554	18.9849	1.32e-05	0.0953332	Up
ENSG00000112799	LY86	0.473555	5.53726	5.29212	0.0214221	0.416553	Up
ENSG00000113312	TTC1	0.277112	5.6279	5.48061	0.0192286	0.396522	Up
ENSG00000113763	UNC5A	0.817683	0.55063	8.22997	0.00412042	0.296634	Up
ENSG00000114270	COL7A1	0.414384	1.60145	4.61104	0.0317667	0.454167	Up
ENSG00000114315	HES1	0.412336	1.04883	4.10734	0.0426975	0.503671	Up
ENSG00000114395	CYB561D2	0.287934	4.7984	4.47357	0.0344231	0.460796	Up
ENSG00000114767	RRP9	0.40381	3.96579	5.06083	0.0244725	0.441127	Up
ENSG00000114812	VIPR1	0.278647	5.47585	4.86005	0.0274856	0.441127	Up
ENSG00000115129	TP53I3	0.344683	2.79143	4.31432	0.0377929	0.477974	Up
ENSG00000115211	EIF2B4	0.265573	4.8384	5.08516	0.0241315	0.439781	Up
ENSG00000115234	SNX17	0.339521	7.29978	6.37478	0.0115754	0.3648	Up
ENSG00000115241	PPM1G	0.27214	6.57365	5.05612	0.0245391	0.441127	Up
ENSG00000115268	RPS15	0.535796	9.05717	4.94955	0.0260974	0.441127	Up
ENSG00000115286	NDUFS7	0.40396	3.31452	5.77906	0.0162182	0.371838	Up
ENSG00000115289	PCGF1	0.399878	3.82217	8.06893	0.00450307	0.301168	Up
ENSG00000115307	AUP1	0.320022	7.32956	5.35718	0.0206371	0.409154	Up
ENSG00000115325	DOK1	0.354478	6.19146	5.49975	0.0190192	0.394251	Up
ENSG00000115350	POLE4	0.500761	4.29026	5.62308	0.0177255	0.384253	Up
ENSG00000115657	ABCB6	0.335197	-0.435675	4.14603	0.0417322	0.497785	Up
ENSG00000115661	STK16	0.281332	4.84071	4.65581	0.0309486	0.449298	Up
ENSG00000115685	PPP1R7	0.342569	5.97976	6.01146	0.0142132	0.3648	Up
ENSG00000116221	MRPL37	0.358556	5.0832	5.30583	0.0212542	0.415197	Up
ENSG00000116288	PARK7	0.349054	6.35211	6.63829	0.00998096	0.359772	Up
ENSG00000116353	MECR	0.301581	2.88632	4.77028	0.0289551	0.441127	Up
ENSG00000116521	SCAMP3	0.385953	5.84434	7.78166	0.00527791	0.308021	Up
ENSG00000116586	LAMTOR2	0.564568	5.26478	8.24536	0.00408563	0.296634	Up
ENSG00000116649	SRM	0.419836	5.20429	6.34781	0.0117526	0.3648	Up
ENSG00000116661	FBXO2	0.500116	1.80132	5.59284	0.0180341	0.387168	Up
ENSG00000116670	MAD2L2	0.431718	4.6278	5.64278	0.0175274	0.38261	Up
ENSG00000116857	TMEM9	0.30657	4.16203	4.12359	0.0422893	0.501819	Up
ENSG00000116898	MRPS15	0.300655	4.58854	4.36033	0.0367852	0.473092	Up
ENSG00000117394	SLC2A1	0.820342	5.9575	6.1298	0.0132922	0.3648	Up
ENSG00000117419	ERI3	0.37489	4.62561	5.33299	0.0209255	0.411257	Up
ENSG00000117448	AKR1A1	0.407083	6.08131	7.97544	0.00474162	0.302888	Up
ENSG00000117480	FAAH	0.556973	4.01263	9.53753	0.00201313	0.291695	Up
ENSG00000117983	MUC5B	0.839974	-1.289	5.68958	0.0170659	0.379235	Up
ENSG00000117984	CTSD	0.632121	8.01846	9.20929	0.0024079	0.296541	Up
ENSG00000118292	C1orf54	0.269829	0.031479	3.88964	0.0485849	0.536401	Up
ENSG00000118640	VAMP8	0.506434	6.2926	6.26482	0.0123158	0.3648	Up
ENSG00000118960	HS1BP3	0.27891	5.69205	5.9136	0.0150244	0.3648	Up
ENSG00000119383	PTPA	0.311954	6.40898	4.70658	0.0300473	0.445087	Up
ENSG00000119421	NDUFA8	0.271295	4.05074	4.31388	0.0378025	0.477974	Up
ENSG00000119431	HDHD3	0.30403	4.28558	4.38687	0.0362167	0.469537	Up
ENSG00000119559	C19orf25	0.354188	5.57625	6.67025	0.00980357	0.358051	Up
ENSG00000119574	ZBTB45	0.340564	3.86754	5.7214	0.0167593	0.377154	Up
ENSG00000119632	IFI27L2	0.599618	3.70209	5.85808	0.0155057	0.367206	Up
ENSG00000119655	NPC2	0.3887	6.85549	5.44319	0.0196447	0.400785	Up
ENSG00000119705	SLIRP	0.402489	1.9864	6.55675	0.0104487	0.36417	Up
ENSG00000120725	SIL1	0.626348	3.29664	12.7711	0.000352025	0.191081	Up
ENSG00000120896	SORBS3	0.42627	4.92159	6.34598	0.0117648	0.3648	Up
ENSG00000120949	TNFRSF8	0.387189	4.58026	8.03767	0.00458145	0.301168	Up
ENSG00000121680	PEX16	0.462276	5.26485	6.78308	0.00920261	0.351297	Up
ENSG00000122140	MRPS2	0.335462	4.08385	4.85846	0.0275109	0.441127	Up
ENSG00000122359	ANXA11	0.284507	9.07608	4.67193	0.0306594	0.447336	Up
ENSG00000122386	ZNF205	0.883114	0.209994	8.39792	0.00375652	0.296634	Up
ENSG00000122390	NAA60	0.333815	6.16526	6.5184	0.0106764	0.3648	Up
ENSG00000122490	SLC66A2	0.337705	6.17168	5.07117	0.024327	0.441127	Up
ENSG00000122543	OCM	0.451851	0.933957	5.52353	0.0187624	0.393007	Up
ENSG00000122705	CLTA	0.306491	6.18994	6.19685	0.0127978	0.3648	Up
ENSG00000122971	ACADS	0.348695	4.46174	5.02468	0.0249886	0.441127	Up
ENSG00000123009	NME2P1	0.530566	1.26235	4.9227	0.0265061	0.441127	Up
ENSG00000123143	PKN1	0.312728	8.0617	4.99557	0.0254123	0.441127	Up
ENSG00000123144	TRIR	0.450391	7.33197	5.35547	0.0206573	0.409217	Up
ENSG00000123154	WDR83	0.423576	1.81129	7.9035	0.00493392	0.304234	Up
ENSG00000123159	GIPC1	0.304389	4.60537	3.93871	0.0471871	0.529262	Up
ENSG00000123353	ORMDL2	0.331258	3.68822	4.43431	0.0352235	0.46474	Up
ENSG00000123384	LRP1	0.366972	7.13039	5.87284	0.0153762	0.36552	Up
ENSG00000123395	ATG101	0.406247	3.46788	7.2336	0.00715515	0.338641	Up
ENSG00000123685	BATF3	0.590454	1.61424	6.48645	0.01087	0.3648	Up
ENSG00000123815	COQ8B	0.264923	5.59483	4.20384	0.0403326	0.492361	Up
ENSG00000123892	RAB38	0.540975	0.150435	3.88879	0.0486095	0.536416	Up
ENSG00000124299	PEPD	0.293736	5.5539	5.78759	0.0161397	0.371812	Up
ENSG00000124313	IQSEC2	0.320521	3.90892	9.44332	0.0021192	0.291695	Up
ENSG00000124357	NAGK	0.327382	8.41619	4.95538	0.0260097	0.441127	Up
ENSG00000124469	CEACAM8	0.881322	2.3129	4.77142	0.028936	0.441127	Up
ENSG00000124562	SNRPC	0.360641	5.23578	5.5719	0.018251	0.389028	Up
ENSG00000124570	SERPINB6	0.440493	6.53818	9.16936	0.00246101	0.296541	Up
ENSG00000124587	PEX6	0.353364	5.67217	5.30327	0.0212854	0.415377	Up
ENSG00000124593	ENSG00000124593	0.501266	-1.7269	7.20483	0.00727078	0.339302	Up
ENSG00000124702	KLHDC3	0.324575	6.42075	6.01251	0.0142048	0.3648	Up
ENSG00000124733	MEA1	0.323279	5.00835	4.47635	0.0343669	0.460796	Up
ENSG00000125089	SH3TC1	0.349767	6.3231	6.73356	0.00946156	0.353393	Up
ENSG00000125148	MT2A	0.748343	4.86008	7.08367	0.00777897	0.339944	Up
ENSG00000125356	NDUFA1	0.423294	4.62117	5.41449	0.0199702	0.403458	Up
ENSG00000125445	MRPS7	0.28967	4.61907	6.10383	0.0134889	0.3648	Up
ENSG00000125458	NT5C	0.522401	4.00199	6.82511	0.00898851	0.34863	Up
ENSG00000125520	SLC2A4RG	0.38634	5.8874	5.06822	0.0243684	0.441127	Up
ENSG00000125534	PPDPF	0.681987	7.28624	7.72667	0.00544109	0.312503	Up
ENSG00000125611	CHCHD5	0.403887	3.4325	3.97416	0.0462034	0.522999	Up
ENSG00000125650	PSPN	0.338577	2.02942	6.29846	0.0120843	0.3648	Up
ENSG00000125651	GTF2F1	0.299682	6.20416	6.82542	0.00898695	0.34863	Up
ENSG00000125652	ALKBH7	0.523013	5.08825	4.04222	0.0443753	0.512954	Up
ENSG00000125726	CD70	0.581616	0.139201	4.4992	0.0339107	0.458871	Up
ENSG00000125734	GPR108	0.323887	6.64307	5.45614	0.0194997	0.399094	Up
ENSG00000125743	SNRPD2	0.510792	5.4666	4.61675	0.0316611	0.453096	Up
ENSG00000125755	SYMPK	0.277677	6.8193	5.60244	0.0179355	0.386639	Up
ENSG00000125817	CENPB	0.381165	6.06339	7.4794	0.00624089	0.324971	Up
ENSG00000125835	SNRPB	0.427769	6.70359	7.53528	0.00605022	0.321547	Up
ENSG00000125877	ITPA	0.410908	5.03404	5.96151	0.0146215	0.3648	Up
ENSG00000125898	FAM110A	0.506264	6.00961	9.51844	0.00203418	0.291695	Up
ENSG00000125910	S1PR4	0.437752	8.45349	5.01763	0.0250904	0.441127	Up
ENSG00000125912	NCLN	0.332507	6.66334	4.54685	0.0329793	0.456731	Up
ENSG00000125970	RALY	0.366309	7.90315	6.00596	0.0142576	0.3648	Up
ENSG00000125991	ERGIC3	0.374651	6.85478	5.55232	0.0184562	0.390751	Up
ENSG00000125995	ROMO1	0.722813	3.78015	9.89476	0.0016575	0.275708	Up
ENSG00000126062	TMEM115	0.286868	5.01674	5.01777	0.0250884	0.441127	Up
ENSG00000126088	UROD	0.392417	5.35686	6.54169	0.0105375	0.3648	Up
ENSG00000126107	HECTD3	0.275695	5.89798	5.6539	0.0174166	0.381404	Up
ENSG00000126247	CAPNS1	0.420321	8.40651	6.62701	0.0100444	0.360622	Up
ENSG00000126254	RBM42	0.42192	6.07949	6.52291	0.0106493	0.3648	Up
ENSG00000126264	HCST	0.595624	3.85515	7.63959	0.0057101	0.314658	Up
ENSG00000126267	COX6B1	0.509419	7.17776	5.72764	0.0166999	0.376718	Up
ENSG00000126453	BCL2L12	0.331873	3.60148	4.30101	0.0380897	0.47935	Up
ENSG00000126456	IRF3	0.31409	7.23196	5.5109	0.0188984	0.393319	Up
ENSG00000126457	PRMT1	0.337244	6.00192	5.786	0.0161543	0.371812	Up
ENSG00000126458	RRAS	0.447429	4.27742	5.82968	0.015758	0.368724	Up
ENSG00000126522	ASL	0.296203	3.98951	4.17997	0.0409043	0.495108	Up
ENSG00000126768	TIMM17B	0.498535	5.26155	5.97254	0.0145303	0.3648	Up
ENSG00000126895	AVPR2	0.530611	-0.062909	5.12947	0.0235229	0.433604	Up
ENSG00000126903	SLC10A3	0.270499	5.31197	4.77185	0.0289287	0.441127	Up
ENSG00000126934	MAP2K2	0.339692	7.56352	4.17372	0.0410556	0.495592	Up
ENSG00000127054	INTS11	0.304702	6.82487	5.87966	0.0153168	0.365439	Up
ENSG00000127191	TRAF2	0.308695	4.66723	5.25311	0.0219075	0.420901	Up
ENSG00000127399	LRRC61	0.397274	2.76363	4.99249	0.0254575	0.441127	Up
ENSG00000127415	IDUA	0.354754	4.30453	6.46998	0.0109712	0.3648	Up
ENSG00000127445	PIN1	0.390665	5.86362	5.45305	0.0195342	0.399539	Up
ENSG00000127554	GFER	0.429453	2.5984	5.39471	0.0201979	0.405575	Up
ENSG00000127580	WDR24	0.356147	3.36541	5.64736	0.0174816	0.381977	Up
ENSG00000127743	IL17B	0.49367	-1.0192	4.92525	0.026467	0.441127	Up
ENSG00000127824	TUBA4A	0.346422	7.96069	4.70312	0.0301079	0.445404	Up
ENSG00000127837	AAMP	0.27913	6.4629	5.58654	0.018099	0.387426	Up
ENSG00000127838	PNKD	0.379809	5.73294	7.9904	0.0047026	0.302772	Up
ENSG00000127884	ECHS1	0.355179	5.42182	5.74112	0.0165723	0.37545	Up
ENSG00000127952	STYXL1	0.610343	4.79956	11.3696	0.00074654	0.232369	Up
ENSG00000128039	SRD5A3	0.441536	0.221493	4.28126	0.0385347	0.482391	Up
ENSG00000128185	DGCR6L	0.568682	5.02866	7.60804	0.00581086	0.316869	Up
ENSG00000128228	SDF2L1	0.425968	3.8408	4.90654	0.0267552	0.441127	Up
ENSG00000128283	CDC42EP1	0.605642	2.72459	5.82177	0.015829	0.369147	Up
ENSG00000128298	BAIAP2L2	0.562338	0.991696	7.66631	0.00562615	0.312503	Up
ENSG00000128311	TST	0.453922	4.90424	4.77355	0.0289002	0.441127	Up
ENSG00000128524	ATP6V1F	0.533759	5.6539	8.03157	0.0045969	0.301168	Up
ENSG00000128604	IRF5	0.266499	6.50279	4.02724	0.0447711	0.51557	Up
ENSG00000128606	LRRC17	0.634447	-1.59144	7.1115	0.00765908	0.339601	Up
ENSG00000128626	MRPS12	0.430318	4.339	5.68595	0.0171013	0.379349	Up
ENSG00000129158	SERGEF	0.389572	3.21565	6.72913	0.00948507	0.353632	Up
ENSG00000129194	SOX15	0.284505	-0.859067	4.01084	0.0452087	0.517831	Up
ENSG00000129219	PLD2	0.32093	4.78526	6.7099	0.00958793	0.354306	Up
ENSG00000129255	MPDU1	0.368904	5.26277	6.1232	0.0133419	0.3648	Up
ENSG00000129437	KLK14	0.630317	-1.38702	6.2737	0.0122543	0.3648	Up
ENSG00000129559	NEDD8	0.363509	5.03205	5.17902	0.0228612	0.428204	Up
ENSG00000129562	DAD1	0.374906	6.35834	5.01061	0.0251924	0.441127	Up
ENSG00000129749	CHRNA10	0.35011	2.11382	5.85007	0.0155764	0.367628	Up
ENSG00000129911	KLF16	0.345296	5.23684	6.22566	0.0125912	0.3648	Up
ENSG00000129925	PGAP6	0.324024	7.28808	5.13305	0.0234745	0.433253	Up
ENSG00000130005	GAMT	0.441659	2.68199	4.22738	0.0397769	0.488929	Up
ENSG00000130035	GALNT8	0.546962	-0.657414	4.64964	0.0310601	0.449324	Up
ENSG00000130175	PRKCSH	0.304018	7.90916	4.10586	0.0427348	0.503739	Up
ENSG00000130204	TOMM40	0.322075	4.81143	4.6779	0.0305531	0.446986	Up
ENSG00000130255	RPL36	0.507022	8.23886	4.56206	0.0326878	0.456731	Up
ENSG00000130303	BST2	0.590757	7.11914	7.03675	0.00798538	0.340533	Up
ENSG00000130304	SLC27A1	0.543281	4.82694	10.2034	0.00140184	0.260859	Up
ENSG00000130305	NSUN5	0.350187	5.60613	6.65566	0.00988414	0.358864	Up
ENSG00000130312	MRPL34	0.275711	4.47414	5.11163	0.0237659	0.435556	Up
ENSG00000130313	PGLS	0.570548	6.66048	7.62598	0.00575334	0.31536	Up
ENSG00000130332	LSM7	0.369461	4.9521	4.95458	0.0260216	0.441127	Up
ENSG00000130433	CACNG6	0.822425	2.39969	8.75729	0.00308367	0.296634	Up
ENSG00000130479	MAP1S	0.331435	5.51626	5.87779	0.0153331	0.365439	Up
ENSG00000130511	SSBP4	0.355101	5.93189	5.05703	0.0245262	0.441127	Up
ENSG00000130520	LSM4	0.293628	5.7875	4.29121	0.03831	0.480561	Up
ENSG00000130529	TRPM4	0.523977	1.36194	4.40496	0.0358345	0.467315	Up
ENSG00000130598	TNNI2	0.630084	3.26429	6.53129	0.0105993	0.3648	Up
ENSG00000130706	ADRM1	0.352855	5.3981	6.14885	0.0131497	0.3648	Up
ENSG00000130724	CHMP2A	0.352644	7.58626	4.038	0.0444866	0.513956	Up
ENSG00000130725	UBE2M	0.37477	5.75742	5.05548	0.0245482	0.441127	Up
ENSG00000130726	TRIM28	0.381858	7.81181	6.23257	0.0125422	0.3648	Up
ENSG00000130731	METTL26	0.610459	5.24176	6.60014	0.0101971	0.361751	Up
ENSG00000130748	TMEM160	0.603569	3.54001	5.04537	0.0246918	0.441127	Up
ENSG00000130758	MAP3K10	0.264721	4.18535	3.89306	0.048486	0.536064	Up
ENSG00000130811	EIF3G	0.479438	7.49174	7.07136	0.0078326	0.339989	Up
ENSG00000130812	ANGPTL6	0.427709	0.439612	6.05159	0.0138938	0.3648	Up
ENSG00000130813	SHFL	0.32426	5.65063	4.33657	0.037302	0.474577	Up
ENSG00000131037	EPS8L1	0.441327	1.07793	7.01586	0.00807909	0.341112	Up
ENSG00000131116	ZNF428	0.392732	3.41041	4.23802	0.0395283	0.487778	Up
ENSG00000131143	COX4I1	0.486284	7.85282	6.52968	0.0106089	0.3648	Up
ENSG00000131187	F12	0.552409	1.85872	7.32717	0.00679201	0.335375	Up
ENSG00000131203	IDO1	0.690934	3.31681	3.88857	0.0486157	0.536416	Up
ENSG00000131398	KCNC3	0.541799	3.39556	7.56057	0.00596592	0.320037	Up
ENSG00000131408	NR1H2	0.272804	6.9263	4.195	0.0405433	0.493683	Up
ENSG00000131475	VPS25	0.317539	5.17761	3.91475	0.0478641	0.532631	Up
ENSG00000131584	ACAP3	0.375908	6.37397	6.38353	0.0115184	0.3648	Up
ENSG00000131591	C1orf159	0.378288	4.08504	5.19272	0.0226817	0.426435	Up
ENSG00000131652	THOC6	0.453927	4.49678	7.34244	0.00673454	0.333589	Up
ENSG00000132000	PODNL1	0.624727	-0.904686	6.52931	0.0106111	0.3648	Up
ENSG00000132004	FBXW9	0.424241	1.64639	5.72982	0.0166792	0.376718	Up
ENSG00000132394	EEFSEC	0.372969	4.45165	4.79269	0.0285808	0.441127	Up
ENSG00000132432	SEC61G	0.33625	4.32606	4.63788	0.0312736	0.450377	Up
ENSG00000132481	TRIM47	0.40926	2.17591	5.43893	0.0196927	0.400785	Up
ENSG00000132507	EIF5A	0.319926	7.15463	4.28422	0.0384677	0.48198	Up
ENSG00000132591	ERAL1	0.273507	4.85063	4.53647	0.0331799	0.456797	Up
ENSG00000132600	PRMT7	0.306136	5.22935	7.24843	0.00709628	0.337639	Up
ENSG00000132612	VPS4A	0.287494	5.70245	4.80204	0.0284261	0.441127	Up
ENSG00000132698	RAB25	0.702899	-0.560622	7.298	0.00690313	0.336908	Up
ENSG00000132879	FBXO44	0.361239	5.15428	6.20996	0.0127033	0.3648	Up
ENSG00000132963	POMP	0.275277	5.01283	4.54171	0.0330785	0.456731	Up
ENSG00000133027	PEMT	0.502897	2.46557	6.84556	0.0088862	0.34863	Up
ENSG00000133069	TMCC2	0.95552	5.51729	4.07005	0.0436499	0.508366	Up
ENSG00000133246	PRAM1	0.483139	7.45984	7.64615	0.00568936	0.314121	Up
ENSG00000133247	KMT5C	0.339281	3.85933	4.54837	0.03295	0.456731	Up
ENSG00000133250	ZNF414	0.486127	3.71092	6.35315	0.0117173	0.3648	Up
ENSG00000133265	HSPBP1	0.434317	4.09659	5.51183	0.0188883	0.393319	Up
ENSG00000133316	WDR74	0.337254	4.47493	6.30429	0.0120446	0.3648	Up
ENSG00000133317	LGALS12	0.632277	4.07609	10.0809	0.00149813	0.268691	Up
ENSG00000133597	ADCK2	0.329129	4.00826	7.95086	0.00480644	0.303047	Up
ENSG00000133612	AGAP3	0.318262	5.1525	11.3152	0.000768771	0.232369	Up
ENSG00000134072	CAMK1	0.513499	2.57996	13.9074	0.000192044	0.173858	Up
ENSG00000134256	CD101	0.489676	4.35083	7.32968	0.00678251	0.33517	Up
ENSG00000134575	ACP2	0.363699	4.37443	8.01172	0.00464756	0.301706	Up
ENSG00000134590	RTL8C	0.336502	4.79573	6.09052	0.0135909	0.3648	Up
ENSG00000134809	TIMM10	0.70961	3.53783	9.23227	0.00237787	0.296541	Up
ENSG00000134824	FADS2	0.758569	4.48399	4.67665	0.0305753	0.446986	Up
ENSG00000134825	TMEM258	0.499301	4.75025	7.68027	0.00558277	0.312503	Up
ENSG00000135124	P2RX4	0.398532	5.15822	9.46644	0.00209265	0.291695	Up
ENSG00000135390	ATP5MC2	0.443094	7.64495	6.74911	0.00937946	0.352629	Up
ENSG00000135404	CD63	0.392581	7.59681	6.25179	0.0124068	0.3648	Up
ENSG00000135441	BLOC1S1	0.467368	3.28439	5.06291	0.0244431	0.441127	Up
ENSG00000135924	DNAJB2	0.387082	6.79751	4.45983	0.0347009	0.462016	Up
ENSG00000135940	COX5B	0.495495	6.44841	5.56267	0.0183474	0.390419	Up
ENSG00000136149	RPL13AP25	0.482688	6.23898	4.11658	0.042465	0.50241	Up
ENSG00000136286	MYO1G	0.313025	8.55002	6.32066	0.011934	0.3648	Up
ENSG00000136315	RNASE2CP	0.825513	0.725436	6.73112	0.00947451	0.353567	Up
ENSG00000136490	LIMD2	0.385677	9.40827	4.76188	0.0290968	0.441127	Up
ENSG00000136630	HLX	0.326684	4.56696	4.33662	0.037301	0.474577	Up
ENSG00000136718	IMP4	0.279761	5.51695	6.21013	0.0127021	0.3648	Up
ENSG00000136830	NIBAN2	0.359462	5.54546	6.83257	0.00895103	0.34863	Up
ENSG00000136877	FPGS	0.2749	5.2716	4.73821	0.0294997	0.441955	Up
ENSG00000136930	PSMB7	0.316728	5.99052	5.52222	0.0187764	0.393007	Up
ENSG00000137078	SIT1	0.373961	5.90074	4.88985	0.027015	0.441127	Up
ENSG00000137100	DCTN3	0.301823	5.57347	4.75531	0.0292081	0.441572	Up
ENSG00000137106	GRHPR	0.354683	5.31177	9.14386	0.00249554	0.296541	Up
ENSG00000137161	CNPY3	0.422692	8.40397	5.87072	0.0153948	0.365797	Up
ENSG00000137166	FOXP4	0.294659	4.02052	5.68073	0.0171522	0.379406	Up
ENSG00000137216	TMEM63B	0.314307	4.9398	5.63148	0.0176407	0.383207	Up
ENSG00000137309	HMGA1	0.359332	6.50085	5.15778	0.0231425	0.430411	Up
ENSG00000137404	NRM	0.32677	4.8463	5.36182	0.0205823	0.408526	Up
ENSG00000137460	FHDC1	0.88357	2.87378	5.34999	0.0207224	0.40942	Up
ENSG00000137672	TRPC6	0.77069	-0.188545	5.26497	0.0217588	0.420362	Up
ENSG00000137726	FXYD6	0.48296	1.92775	7.65006	0.00567704	0.314121	Up
ENSG00000137818	RPLP1	0.464036	10.0416	4.29799	0.0381575	0.479581	Up
ENSG00000137877	SPTBN5	0.463622	2.18624	4.44065	0.0350928	0.464136	Up
ENSG00000137880	GCHFR	0.525971	-0.530677	5.73091	0.0166688	0.376718	Up
ENSG00000138495	COX17	0.430503	3.2419	11.8594	0.000573697	0.215429	Up
ENSG00000138606	SHF	0.470391	0.321233	8.21366	0.00415762	0.296634	Up
ENSG00000138623	SEMA7A	0.379909	4.09304	8.40403	0.0037439	0.296634	Up
ENSG00000138629	UBL7	0.37178	6.49703	4.42782	0.0353576	0.46552	Up
ENSG00000138801	PAPSS1	0.372208	5.62636	5.84282	0.0156407	0.367904	Up
ENSG00000138964	PARVG	0.265018	7.93431	4.82884	0.0279875	0.441127	Up
ENSG00000139343	SNRPF	0.327512	3.77503	4.85456	0.0275732	0.441127	Up
ENSG00000139410	SDSL	0.496926	1.21026	4.25067	0.0392349	0.486346	Up
ENSG00000139574	NPFF	0.809302	1.00427	10.8728	0.000975856	0.239072	Up
ENSG00000139914	FITM1	0.562894	0.950413	9.2331	0.00237679	0.296541	Up
ENSG00000139974	SLC38A6	0.304559	2.15054	13.0566	0.000302225	0.186628	Up
ENSG00000140263	SORD	0.318482	4.15346	4.85564	0.0275558	0.441127	Up
ENSG00000140365	COMMD4	0.48515	4.72149	8.27666	0.00401579	0.296634	Up
ENSG00000140368	PSTPIP1	0.425511	7.89292	6.8636	0.00879693	0.34863	Up
ENSG00000140650	PMM2	0.29463	4.79629	4.99002	0.0254938	0.441127	Up
ENSG00000140961	OSGIN1	0.405892	2.53494	3.9287	0.0474687	0.530429	Up
ENSG00000140990	NDUFB10	0.504746	5.74243	7.3692	0.00663503	0.332677	Up
ENSG00000141002	TCF25	0.279311	7.21643	5.25233	0.0219174	0.420907	Up
ENSG00000141294	LRRC46	0.445768	0.993761	6.08622	0.013624	0.3648	Up
ENSG00000141295	SCRN2	0.377815	4.64425	6.77154	0.00926229	0.351983	Up
ENSG00000141349	G6PC3	0.363164	4.72941	4.95545	0.0260086	0.441127	Up
ENSG00000141499	WRAP53	0.341742	4.10373	6.28654	0.0121658	0.3648	Up
ENSG00000141504	SAT2	0.51417	5.38725	9.44908	0.00211255	0.291695	Up
ENSG00000141505	ASGR1	0.604245	3.97793	9.99927	0.00156602	0.272793	Up
ENSG00000141552	ANAPC11	0.594177	4.68807	8.95717	0.00276383	0.296541	Up
ENSG00000141570	CBX8	0.276544	2.81592	5.94173	0.0147865	0.3648	Up
ENSG00000141741	MIEN1	0.421966	4.71494	5.12549	0.0235769	0.434028	Up
ENSG00000141858	SAMD1	0.31263	4.83486	4.89377	0.0269538	0.441127	Up
ENSG00000141873	SLC39A3	0.419126	4.00303	5.68763	0.0170849	0.379254	Up
ENSG00000141933	TPGS1	0.537013	2.43164	5.39798	0.0201601	0.405067	Up
ENSG00000141959	PFKL	0.293942	7.43523	5.77289	0.0162752	0.372191	Up
ENSG00000141971	MVB12A	0.48807	4.6402	8.03374	0.00459139	0.301168	Up
ENSG00000142227	EMP3	0.574372	8.28616	8.66963	0.00323556	0.296634	Up
ENSG00000142327	RNPEPL1	0.445313	8.3533	5.96928	0.0145572	0.3648	Up
ENSG00000142408	CACNG8	0.771003	2.0336	11.3959	0.000736059	0.232369	Up
ENSG00000142409	ZNF787	0.385748	5.36178	4.84964	0.027652	0.441127	Up
ENSG00000142494	SLC47A1	0.621393	0.0804376	6.02584	0.0140979	0.3648	Up
ENSG00000142507	PSMB6	0.474416	5.63233	6.71148	0.0095794	0.354306	Up
ENSG00000142544	CTU1	0.532298	2.91849	8.28934	0.00398785	0.296634	Up
ENSG00000142552	RCN3	0.673292	5.49289	6.37345	0.011584	0.3648	Up
ENSG00000142632	ARHGEF19	0.278378	3.03692	6.34658	0.0117608	0.3648	Up
ENSG00000142669	SH3BGRL3	0.443683	9.56909	4.99503	0.0254201	0.441127	Up
ENSG00000142733	MAP3K6	0.327957	3.52715	4.15063	0.0416189	0.497785	Up
ENSG00000142765	SYTL1	0.347321	7.8102	6.42339	0.0112627	0.3648	Up
ENSG00000143198	MGST3	0.434107	4.94723	6.60129	0.0101905	0.361751	Up
ENSG00000143224	PPOX	0.279817	4.68929	5.36369	0.0205602	0.408526	Up
ENSG00000143256	PFDN2	0.409553	3.49274	7.94288	0.00482768	0.303047	Up
ENSG00000143314	MRPL24	0.349542	4.3851	4.24853	0.0392843	0.486519	Up
ENSG00000143368	SF3B4	0.266266	6.64468	4.47308	0.034433	0.460796	Up
ENSG00000143479	DYRK3	1.03331	1.08818	6.34971	0.0117401	0.3648	Up
ENSG00000143537	ADAM15	0.438747	6.28182	8.38116	0.0037913	0.296634	Up
ENSG00000143552	NUP210L	0.55799	-1.8472	4.23303	0.0396447	0.488367	Up
ENSG00000143554	SLC27A3	0.343128	5.84476	4.95911	0.0259536	0.441127	Up
ENSG00000143590	EFNA3	0.424614	0.516624	4.08688	0.0432175	0.506479	Up
ENSG00000143801	PSEN2	0.371624	-0.127463	5.19198	0.0226914	0.426435	Up
ENSG00000144579	CTDSP1	0.302327	8.49689	4.98962	0.0254998	0.441127	Up
ENSG00000144591	GMPPA	0.414172	5.43259	6.37948	0.0115447	0.3648	Up
ENSG00000145494	NDUFS6	0.550154	4.84932	6.46895	0.0109775	0.3648	Up
ENSG00000145912	NHP2	0.397383	4.01256	5.06694	0.0243864	0.441127	Up
ENSG00000146066	HIGD2A	0.502439	5.67837	6.41472	0.0113178	0.3648	Up
ENSG00000146070	PLA2G7	0.438151	2.97152	5.66746	0.0172825	0.380096	Up
ENSG00000146232	NFKBIE	0.274588	5.17497	5.38192	0.0203464	0.407639	Up
ENSG00000146540	C7orf50	0.533279	5.03306	7.43834	0.00638486	0.328425	Up
ENSG00000146701	MDH2	0.274414	6.52209	5.53519	0.0186377	0.392337	Up
ENSG00000147123	NDUFB11	0.615851	5.92952	7.49373	0.00619144	0.324124	Up
ENSG00000147155	EBP	0.365231	3.27049	4.35693	0.0368587	0.473126	Up
ENSG00000147403	RPL10	0.522858	10.7418	4.94838	0.0261151	0.441127	Up
ENSG00000147443	DOK2	0.508324	7.51691	10.4683	0.00121443	0.253012	Up
ENSG00000147684	NDUFB9	0.371009	5.48006	5.17587	0.0229027	0.428724	Up
ENSG00000147804	SLC39A4	0.702377	2.68755	8.29421	0.00397716	0.296634	Up
ENSG00000147813	NAPRT	0.514657	5.33057	5.92209	0.0149522	0.3648	Up
ENSG00000147852	VLDLR	0.563204	0.925768	5.97297	0.0145268	0.3648	Up
ENSG00000148204	CRB2	0.739067	-0.70377	7.14147	0.00753214	0.339302	Up
ENSG00000148219	ASTN2	0.289192	0.666458	4.41704	0.0355816	0.466005	Up
ENSG00000148288	GBGT1	0.411884	4.1831	5.90847	0.0150683	0.3648	Up
ENSG00000148290	SURF1	0.334277	5.72589	4.1785	0.0409398	0.495108	Up
ENSG00000148291	SURF2	0.505865	3.49423	7.41827	0.00645649	0.33025	Up
ENSG00000148334	PTGES2	0.329	5.11665	5.00874	0.0252197	0.441127	Up
ENSG00000148335	NTMT1	0.326608	3.15657	6.42386	0.0112597	0.3648	Up
ENSG00000148344	PTGES	0.795131	0.657767	5.43577	0.0197284	0.400858	Up
ENSG00000148346	LCN2	1.25535	4.73334	10.9534	0.000934338	0.239072	Up
ENSG00000148356	LRSAM1	0.27294	5.43677	6.39699	0.0114314	0.3648	Up
ENSG00000148362	PAXX	0.591032	5.93675	7.70814	0.00549724	0.312503	Up
ENSG00000148655	LRMDA	0.54405	2.1607	6.48733	0.0108646	0.3648	Up
ENSG00000148803	FUOM	0.616769	2.99776	6.8479	0.00887454	0.34863	Up
ENSG00000149091	DGKZ	0.278734	8.39231	4.85958	0.027493	0.441127	Up
ENSG00000149273	RPS3	0.411855	10.1006	4.29446	0.0382368	0.480046	Up
ENSG00000149357	LAMTOR1	0.265609	7.20456	3.97725	0.0461187	0.522587	Up
ENSG00000149418	ST14	0.32633	4.72538	3.90974	0.0480069	0.533495	Up
ENSG00000149485	FADS1	0.299732	3.54315	4.74653	0.0293575	0.441955	Up
ENSG00000149541	B3GAT3	0.462574	5.80075	7.03343	0.00800018	0.340591	Up
ENSG00000149571	KIRREL3	0.537091	-0.0222089	4.89421	0.0269469	0.441127	Up
ENSG00000149743	TRPT1	0.321371	3.90733	4.38776	0.0361979	0.46939	Up
ENSG00000149761	NUDT22	0.390349	4.75324	7.03154	0.00800866	0.340606	Up
ENSG00000149782	PLCB3	0.303312	4.41638	6.42019	0.011283	0.3648	Up
ENSG00000149806	FAU	0.477727	7.51994	4.22339	0.0398704	0.489865	Up
ENSG00000149923	PPP4C	0.359047	7.36616	4.80404	0.0283932	0.441127	Up
ENSG00000149925	ALDOA	0.365785	3.90617	4.74515	0.029381	0.441955	Up
ENSG00000149932	TMEM219	0.451391	6.55808	6.66923	0.00980916	0.358051	Up
ENSG00000150048	CLEC1A	0.38307	1.70114	6.60078	0.0101934	0.361751	Up
ENSG00000151366	NDUFC2	0.269023	3.08276	8.08182	0.00447115	0.301168	Up
ENSG00000151500	THYN1	0.284887	4.93436	5.02911	0.0249247	0.441127	Up
ENSG00000151650	VENTX	0.552135	4.21365	8.68998	0.00319964	0.296634	Up
ENSG00000152082	MZT2B	0.627972	4.13678	5.65903	0.0173657	0.380908	Up
ENSG00000152207	CYSLTR2	0.373332	3.81343	3.87678	0.0489585	0.538367	Up
ENSG00000153048	CARHSP1	0.301478	4.95023	4.00442	0.0453812	0.518654	Up
ENSG00000153406	NMRAL1	0.399528	5.34759	4.1187	0.0424116	0.50241	Up
ENSG00000153443	UBALD1	0.457032	5.33871	7.16306	0.007442	0.339302	Up
ENSG00000153531	ADPRHL1	0.364013	-0.319382	4.3006	0.0380989	0.47937	Up
ENSG00000153551	CMTM7	0.373104	6.29133	8.10466	0.00441516	0.301168	Up
ENSG00000153902	LGI4	0.58005	-1.07665	6.42396	0.0112591	0.3648	Up
ENSG00000154518	ATP5MC3	0.328655	6.10855	6.89166	0.00865986	0.347003	Up
ENSG00000154723	ATP5PF	0.350496	3.77154	4.59811	0.0320071	0.455243	Up
ENSG00000154832	CXXC1	0.273048	6.41418	4.65762	0.030916	0.449198	Up
ENSG00000155254	MARVELD1	0.306837	4.11738	3.90728	0.0480773	0.533968	Up
ENSG00000155368	DBI	0.351285	4.43141	4.26056	0.039007	0.485344	Up
ENSG00000155465	SLC7A7	0.30641	7.58269	5.65901	0.0173659	0.380908	Up
ENSG00000156603	MED19	0.278967	3.11067	5.26615	0.0217441	0.420207	Up
ENSG00000156869	FRRS1	0.623954	2.23724	10.0552	0.00151917	0.269226	Up
ENSG00000156873	PHKG2	0.433797	5.85419	7.13029	0.00757923	0.339302	Up
ENSG00000156990	RPUSD3	0.299774	4.88455	4.6496	0.0310608	0.449324	Up
ENSG00000157326	DHRS4	0.551836	3.84415	9.98268	0.0015802	0.272987	Up
ENSG00000157368	IL34	1.12167	-0.00896137	12.1764	0.00048397	0.202844	Up
ENSG00000157379	DHRS1	0.307691	4.98735	6.60251	0.0101835	0.361751	Up
ENSG00000157637	SLC38A10	0.292322	7.25417	6.5693	0.0103753	0.362874	Up
ENSG00000157778	PSMG3	0.379956	3.97322	6.53254	0.0105919	0.3648	Up
ENSG00000158019	BABAM2	0.360876	5.06641	5.15998	0.0231131	0.430313	Up
ENSG00000158042	MRPL17	0.299943	3.53248	5.76221	0.0163744	0.373242	Up
ENSG00000158062	UBXN11	0.492259	7.46416	7.71485	0.00547683	0.312503	Up
ENSG00000158428	CATIP	0.525216	-0.584259	3.96025	0.0465867	0.525725	Up
ENSG00000158552	ZFAND2B	0.366221	6.06617	4.98936	0.0255036	0.441127	Up
ENSG00000158555	GDPD5	0.294535	5.57304	3.91403	0.0478846	0.532703	Up
ENSG00000158716	DUSP23	0.581363	3.8507	6.8918	0.00865918	0.347003	Up
ENSG00000158825	CDA	0.487428	7.32532	4.36976	0.0365821	0.471354	Up
ENSG00000158864	NDUFS2	0.268415	6.65786	6.29593	0.0121016	0.3648	Up
ENSG00000159069	FBXW5	0.376106	7.3969	5.21574	0.0223833	0.423845	Up
ENSG00000159199	ATP5MC1	0.508849	5.03509	6.61983	0.0100849	0.360974	Up
ENSG00000159228	CBR1	0.420793	4.17924	8.9978	0.00270305	0.296541	Up
ENSG00000159231	CBR3	0.550117	-0.0796299	4.9335	0.0263409	0.441127	Up
ENSG00000159363	ATP13A2	0.281893	5.5243	6.12133	0.013356	0.3648	Up
ENSG00000159377	PSMB4	0.334038	7.4516	5.22916	0.0222112	0.422978	Up
ENSG00000159423	ALDH4A1	0.288118	2.86992	5.41884	0.0199206	0.402975	Up
ENSG00000159640	ACE	0.500456	1.15857	8.54848	0.0034581	0.296634	Up
ENSG00000159685	CHCHD6	0.348424	1.5631	3.87313	0.0490649	0.538367	Up
ENSG00000159714	ZDHHC1	0.498824	1.45431	5.19003	0.0227169	0.426647	Up
ENSG00000159720	ATP6V0D1	0.400296	8.38316	5.59758	0.0179853	0.386992	Up
ENSG00000159884	CCDC107	0.415758	1.41366	4.47561	0.0343819	0.460796	Up
ENSG00000160055	TMEM234	0.280779	3.52078	4.41254	0.0356757	0.466671	Up
ENSG00000160180	TFF3	0.933494	-0.569098	6.44517	0.0111254	0.3648	Up
ENSG00000160209	PDXK	0.37642	6.73475	12.4844	0.000410365	0.193489	Up
ENSG00000160211	G6PD	0.324405	7.49698	4.29556	0.038212	0.47983	Up
ENSG00000160214	RRP1	0.268886	4.26654	4.14792	0.0416857	0.497785	Up
ENSG00000160233	LRRC3	0.32409	1.38798	4.71432	0.0299124	0.444398	Up
ENSG00000160256	SLX9	0.528354	3.1743	8.46441	0.00362163	0.296634	Up
ENSG00000160325	CACFD1	0.431392	3.04222	9.44169	0.00212108	0.291695	Up
ENSG00000160326	SLC2A6	0.298431	5.4718	5.43477	0.0197397	0.400858	Up
ENSG00000160392	C19orf47	0.328814	3.50933	6.4516	0.0110853	0.3648	Up
ENSG00000160404	TOR2A	0.318956	5.26731	6.21347	0.0126782	0.3648	Up
ENSG00000160446	ZDHHC12	0.428468	5.50334	5.30483	0.0212663	0.415197	Up
ENSG00000160539	PLPP7	0.465452	0.0698846	4.24822	0.0392915	0.486519	Up
ENSG00000160688	FLAD1	0.307906	5.12085	5.43963	0.0196848	0.400785	Up
ENSG00000160783	PMF1	0.445526	4.46345	5.20102	0.0225736	0.425712	Up
ENSG00000160799	CCDC12	0.355696	5.11416	5.75443	0.0164471	0.374373	Up
ENSG00000160932	LY6E	0.775598	8.17037	5.10592	0.0238443	0.436383	Up
ENSG00000160948	VPS28	0.482483	7.45412	6.29965	0.0120762	0.3648	Up
ENSG00000160957	RECQL4	0.304339	2.36502	4.96384	0.0258826	0.441127	Up
ENSG00000160972	PPP1R16A	0.446551	2.72828	6.22809	0.0125739	0.3648	Up
ENSG00000161016	RPL8	0.419293	9.88775	4.05606	0.044013	0.510162	Up
ENSG00000161091	MFSD12	0.340555	5.91986	8.64681	0.00327635	0.296634	Up
ENSG00000161203	AP2M1	0.308672	8.15621	4.97306	0.025745	0.441127	Up
ENSG00000161265	U2AF1L4	0.364715	3.03558	4.44781	0.034946	0.463507	Up
ENSG00000161395	PGAP3	0.376087	5.0324	6.75666	0.00933983	0.352407	Up
ENSG00000161642	ZNF385A	0.481223	6.84143	7.69885	0.0055256	0.312503	Up
ENSG00000161653	NAGS	0.309615	1.82927	4.13959	0.0418914	0.498673	Up
ENSG00000161671	EMC10	0.313473	6.15349	6.36747	0.0116231	0.3648	Up
ENSG00000161677	JOSD2	0.560683	4.14187	7.3234	0.00680625	0.335716	Up
ENSG00000161905	ALOX15	0.825098	4.85096	4.97368	0.0257359	0.441127	Up
ENSG00000161914	ZNF653	0.44789	2.4316	6.95323	0.0083668	0.343825	Up
ENSG00000161944	ASGR2	0.791706	4.57026	11.4846	0.000701748	0.232369	Up
ENSG00000161980	POLR3K	0.385921	3.46578	8.23276	0.00411409	0.296634	Up
ENSG00000162066	AMDHD2	0.319962	4.49719	6.25301	0.0123983	0.3648	Up
ENSG00000162076	FLYWCH2	0.348191	3.55111	4.28241	0.0385086	0.482391	Up
ENSG00000162148	PPP1R32	0.604785	2.502	8.67127	0.00323266	0.296634	Up
ENSG00000162174	ASRGL1	0.376177	2.43839	8.42492	0.00370113	0.296634	Up
ENSG00000162191	UBXN1	0.446189	7.09962	6.95256	0.00836996	0.343825	Up
ENSG00000162227	TAF6L	0.273882	3.28746	4.54638	0.0329885	0.456731	Up
ENSG00000162236	STX5	0.383452	6.09846	5.75891	0.0164052	0.373691	Up
ENSG00000162244	RPL29	0.439301	9.29738	4.30742	0.0379465	0.478708	Up
ENSG00000162302	RPS6KA4	0.431061	6.41904	9.0591	0.0026139	0.296541	Up
ENSG00000162390	ACOT11	0.565318	0.656868	9.02427	0.00266419	0.296541	Up
ENSG00000162444	RBP7	0.469129	4.38335	4.76011	0.0291267	0.441127	Up
ENSG00000162512	SDC3	0.545264	2.35508	3.90268	0.0482093	0.534486	Up
ENSG00000162517	PEF1	0.288814	6.00375	4.88692	0.027061	0.441127	Up
ENSG00000162572	SCNN1D	0.421508	2.84008	4.52561	0.0333913	0.456998	Up
ENSG00000162585	FAAP20	0.475446	5.31208	5.98304	0.0144441	0.3648	Up
ENSG00000162881	OXER1	0.543416	4.95792	5.69366	0.0170263	0.378897	Up
ENSG00000162882	HAAO	0.462972	2.7096	5.91009	0.0150544	0.3648	Up
ENSG00000162910	MRPL55	0.485002	4.38677	5.98888	0.0143964	0.3648	Up
ENSG00000163154	TNFAIP8L2	0.341979	6.76346	4.38504	0.0362556	0.469652	Up
ENSG00000163155	LYSMD1	0.554213	3.16087	7.19553	0.00730852	0.339302	Up
ENSG00000163156	SCNM1	0.381943	5.63083	4.63352	0.0313532	0.450479	Up
ENSG00000163159	VPS72	0.285664	5.27582	4.99615	0.0254037	0.441127	Up
ENSG00000163344	PMVK	0.523717	4.67352	7.9093	0.00491812	0.304234	Up
ENSG00000163354	DCST2	0.393065	0.962068	5.83536	0.0157072	0.368666	Up
ENSG00000163382	NAXE	0.4774	4.94452	6.98529	0.00821822	0.342073	Up
ENSG00000163481	RNF25	0.396077	4.562	6.20144	0.0127646	0.3648	Up
ENSG00000163517	HDAC11	0.326714	3.05472	6.65168	0.00990622	0.359086	Up
ENSG00000163531	NFASC	0.541441	-1.88161	4.19842	0.0404616	0.493455	Up
ENSG00000163870	TPRA1	0.389738	4.9934	9.73004	0.0018128	0.286666	Up
ENSG00000163931	TKT	0.414579	10.1458	6.2886	0.0121517	0.3648	Up
ENSG00000163975	MELTF	0.494642	0.363037	6.38713	0.0114951	0.3648	Up
ENSG00000163995	ABLIM2	0.467006	0.323723	9.39935	0.00217062	0.292833	Up
ENSG00000164047	CAMP	0.896712	4.27115	7.9445	0.00482338	0.303047	Up
ENSG00000164077	MON1A	0.295292	3.42511	4.50589	0.0337783	0.458839	Up
ENSG00000164081	TEX264	0.390696	5.87931	7.35602	0.00668384	0.333128	Up
ENSG00000164535	DAGLB	0.321155	5.5261	8.79916	0.00301369	0.296634	Up
ENSG00000164713	BRI3	0.308466	7.15513	4.66793	0.0307309	0.447443	Up
ENSG00000164821	DEFA4	1.26253	2.64845	7.15379	0.00748057	0.339302	Up
ENSG00000164850	GPER1	0.666199	0.910427	5.39224	0.0202265	0.405759	Up
ENSG00000164880	INTS1	0.2746	7.00869	5.53352	0.0186556	0.392376	Up
ENSG00000164885	CDK5	0.452256	3.41616	8.34996	0.00385696	0.296634	Up
ENSG00000164896	FASTK	0.403724	6.4248	5.99711	0.0143293	0.3648	Up
ENSG00000164897	TMUB1	0.496585	5.44504	7.03576	0.00798979	0.340533	Up
ENSG00000164919	COX6C	0.434353	3.26774	4.85273	0.0276023	0.441127	Up
ENSG00000164967	RPP25L	0.454512	4.43805	7.44789	0.0063511	0.328054	Up
ENSG00000165140	FBP1	0.326292	4.39171	4.97804	0.0256711	0.441127	Up
ENSG00000165238	WNK2	0.653813	0.122249	4.42409	0.0354349	0.465952	Up
ENSG00000165283	STOML2	0.277258	5.16748	4.55635	0.0327969	0.456731	Up
ENSG00000165457	FOLR2	0.67496	2.38664	12.0277	0.000524169	0.209367	Up
ENSG00000165502	RPL36AL	0.353463	6.80735	6.14915	0.0131475	0.3648	Up
ENSG00000165548	TMEM63C	0.681778	2.56983	5.01865	0.0250757	0.441127	Up
ENSG00000165644	COMTD1	0.587719	3.17188	6.23443	0.012529	0.3648	Up
ENSG00000165702	GFI1B	0.457761	4.41863	5.81066	0.0159294	0.37066	Up
ENSG00000165752	STK32C	0.489732	4.06455	7.09286	0.00773915	0.339944	Up
ENSG00000165802	NSMF	0.36233	5.84217	8.16007	0.00428228	0.297371	Up
ENSG00000165898	ISCA2	0.266383	3.94626	5.25962	0.0218258	0.42078	Up
ENSG00000165916	PSMC3	0.414278	5.58918	6.7764	0.00923709	0.351705	Up
ENSG00000165917	RAPSN	0.517542	0.211655	6.45414	0.0110694	0.3648	Up
ENSG00000166002	SMCO4	0.440317	4.29437	5.12271	0.0236147	0.434276	Up
ENSG00000166025	AMOTL1	0.633773	0.950986	6.06878	0.0137592	0.3648	Up
ENSG00000166145	SPINT1	0.395416	4.87686	5.43916	0.0196902	0.400785	Up
ENSG00000166166	TRMT61A	0.439397	4.15448	6.96685	0.00830337	0.343354	Up
ENSG00000166228	PCBD1	0.300717	2.88632	4.31103	0.0378661	0.477974	Up
ENSG00000166311	SMPD1	0.273132	5.64041	4.06361	0.0438167	0.509218	Up
ENSG00000166428	PLD4	0.586468	4.80578	8.24944	0.00407647	0.296634	Up
ENSG00000166452	AKIP1	0.310747	2.69891	6.34495	0.0117716	0.3648	Up
ENSG00000166557	TMED3	0.326516	5.0678	5.27508	0.0216328	0.419232	Up
ENSG00000166578	IQCD	0.356603	-0.981213	4.163	0.0413161	0.496977	Up
ENSG00000166592	RRAD	1.13259	-1.74864	13.935	0.000189243	0.173858	Up
ENSG00000166595	CIAO2B	0.369074	4.71651	5.19359	0.0226704	0.426435	Up
ENSG00000166793	YPEL4	1.46533	2.18473	10.6589	0.00109543	0.251628	Up
ENSG00000166794	PPIB	0.289953	6.21356	4.08088	0.043371	0.507096	Up
ENSG00000167077	MEI1	0.353884	4.65142	4.99387	0.0254372	0.441127	Up
ENSG00000167085	PHB	0.304521	4.84003	4.60364	0.0319042	0.454711	Up
ENSG00000167107	ACSF2	0.403672	4.17315	7.47453	0.0062578	0.324971	Up
ENSG00000167114	SLC27A4	0.29955	4.15706	6.71954	0.0095362	0.354306	Up
ENSG00000167118	URM1	0.367851	5.89169	6.43848	0.0111674	0.3648	Up
ENSG00000167136	ENDOG	0.442119	0.960972	4.51047	0.033688	0.458259	Up
ENSG00000167393	PPP2R3B	0.377799	4.36401	11.5766	0.000667856	0.228016	Up
ENSG00000167397	VKORC1	0.366016	2.46395	4.11586	0.042483	0.50241	Up
ENSG00000167508	MVD	0.435018	5.05719	5.22491	0.0222656	0.42337	Up
ENSG00000167513	CDT1	0.414898	0.812544	4.30705	0.0379546	0.478708	Up
ENSG00000167515	TRAPPC2L	0.368455	4.71502	4.99585	0.0254082	0.441127	Up
ENSG00000167525	PROCA1	0.466552	3.71364	16.7107	4.35e-05	0.115832	Up
ENSG00000167543	TP53I13	0.347469	5.4906	5.56168	0.0183578	0.390508	Up
ENSG00000167566	NCKAP5L	0.265088	5.27444	5.78506	0.0161629	0.371818	Up
ENSG00000167608	TMC4	0.622052	2.22192	5.8481	0.0155939	0.367628	Up
ENSG00000167645	YIF1B	0.511864	5.44453	7.59614	0.00584934	0.317015	Up
ENSG00000167657	DAPK3	0.368948	5.36963	6.02905	0.0140723	0.3648	Up
ENSG00000167700	MFSD3	0.446285	3.01174	5.84651	0.015608	0.367684	Up
ENSG00000167711	SERPINF2	0.488329	1.73049	4.57099	0.0325177	0.456731	Up
ENSG00000167747	C19orf48	0.411733	4.15309	4.35628	0.0368728	0.473126	Up
ENSG00000167748	KLK1	0.744982	0.244761	5.02009	0.0250549	0.441127	Up
ENSG00000167770	OTUB1	0.407965	6.76218	6.3326	0.0118539	0.3648	Up
ENSG00000167775	CD320	0.554477	4.40607	7.56418	0.00595397	0.319943	Up
ENSG00000167779	IGFBP6	0.676002	-0.498591	6.89816	0.00862846	0.346851	Up
ENSG00000167792	NDUFV1	0.402362	6.89118	6.59057	0.0102521	0.362405	Up
ENSG00000167797	CDK2AP2	0.337286	6.19307	5.4993	0.0190241	0.394251	Up
ENSG00000167799	NUDT8	0.49234	0.00385034	4.00656	0.0453236	0.518209	Up
ENSG00000167850	CD300C	0.444868	4.9623	8.61887	0.00332698	0.296634	Up
ENSG00000167863	ATP5PD	0.376594	5.21936	5.176	0.022901	0.428724	Up
ENSG00000167874	TMEM88	0.529701	2.65957	4.72058	0.0298038	0.443941	Up
ENSG00000167925	GHDC	0.471877	5.28405	10.4823	0.00120524	0.252779	Up
ENSG00000167930	FAM234A	0.32226	5.28318	5.98636	0.0144169	0.3648	Up
ENSG00000167965	MLST8	0.4241	4.42089	6.72741	0.00949426	0.353764	Up
ENSG00000167969	ECI1	0.478696	4.30509	6.70465	0.00961616	0.354306	Up
ENSG00000167985	SDHAF2	0.298583	3.61008	4.68434	0.0304388	0.446514	Up
ENSG00000168003	SLC3A2	0.339281	6.24749	7.6342	0.00572717	0.315249	Up
ENSG00000168004	PLAAT5	0.711649	0.319714	7.10694	0.00767861	0.339601	Up
ENSG00000168060	NAALADL1	0.438394	3.67318	4.62886	0.0314385	0.451146	Up
ENSG00000168061	SAC3D1	0.437489	2.66259	6.42848	0.0112305	0.3648	Up
ENSG00000168071	CCDC88B	0.351141	8.85437	5.48918	0.0191345	0.395494	Up
ENSG00000168090	COPS6	0.35279	5.88338	5.81629	0.0158784	0.369887	Up
ENSG00000168101	NUDT16L1	0.314875	5.49992	4.49995	0.0338959	0.458871	Up
ENSG00000168140	VASN	0.416791	1.16022	6.07792	0.0136882	0.3648	Up
ENSG00000168273	SMIM4	0.272405	1.80704	5.26286	0.0217852	0.420547	Up
ENSG00000168389	MFSD2A	0.519624	2.56729	12.4323	0.000421978	0.193989	Up
ENSG00000168393	DTYMK	0.319621	3.55786	5.44573	0.0196163	0.400696	Up
ENSG00000168397	ATG4B	0.286976	6.56457	5.07023	0.0243401	0.441127	Up
ENSG00000168476	REEP4	0.466339	5.18688	11.5193	0.000688785	0.230982	Up
ENSG00000168546	GFRA2	0.513451	0.708763	3.98578	0.045886	0.52133	Up
ENSG00000168653	NDUFS5	0.474591	3.91042	5.08277	0.0241647	0.440258	Up
ENSG00000168701	TMEM208	0.455076	4.36787	6.38804	0.0114892	0.3648	Up
ENSG00000168874	ATOH8	1.44601	1.98412	15.5096	8.21e-05	0.151404	Up
ENSG00000168890	TMEM150A	0.279326	3.81809	6.91153	0.00856416	0.346266	Up
ENSG00000168894	RNF181	0.513167	5.59742	7.1787	0.00737742	0.339302	Up
ENSG00000168913	ENHO	0.727195	0.881913	4.48369	0.0342197	0.46016	Up
ENSG00000168961	LGALS9	0.478518	7.88885	5.99655	0.0143339	0.3648	Up
ENSG00000169020	ATP5ME	0.562916	1.67018	7.98343	0.00472074	0.302888	Up
ENSG00000169084	DHRSX	0.439818	4.17652	8.10428	0.00441609	0.301168	Up
ENSG00000169100	SLC25A6	0.398086	8.92755	5.87574	0.0153509	0.365439	Up
ENSG00000169136	ATF5	0.53413	3.87249	8.97381	0.00273877	0.296541	Up
ENSG00000169189	NSMCE1	0.444379	5.30275	6.56081	0.0104249	0.363798	Up
ENSG00000169221	TBC1D10B	0.275967	6.55419	5.95546	0.0146717	0.3648	Up
ENSG00000169228	RAB24	0.322163	4.61714	4.58727	0.0322104	0.456218	Up
ENSG00000169230	PRELID1	0.436434	6.09626	7.34298	0.00673251	0.333589	Up
ENSG00000169385	RNASE2	0.63899	4.95016	3.92115	0.0476823	0.531467	Up
ENSG00000169397	RNASE3	1.23502	2.29238	8.95744	0.00276341	0.296541	Up
ENSG00000169683	LRRC45	0.386015	4.13239	7.49553	0.00618523	0.324124	Up
ENSG00000169689	CENPX	0.55289	3.82108	7.81154	0.00519136	0.307936	Up
ENSG00000169692	AGPAT2	0.550916	5.64813	8.18388	0.00422642	0.297306	Up
ENSG00000169696	ASPSCR1	0.512005	5.19309	8.46274	0.00362495	0.296634	Up
ENSG00000169715	MT1E	0.912043	0.576952	11.0319	0.000895573	0.235972	Up
ENSG00000169718	DUS1L	0.297762	6.65893	4.44035	0.035099	0.464136	Up
ENSG00000169727	GPS1	0.374362	6.23955	6.51926	0.0106713	0.3648	Up
ENSG00000169733	RFNG	0.45061	5.21482	7.14116	0.00753345	0.339302	Up
ENSG00000169750	RAC3	0.50333	-0.0970556	4.8345	0.0278958	0.441127	Up
ENSG00000169972	PUSL1	0.397844	2.95014	6.23701	0.0125108	0.3648	Up
ENSG00000169976	SF3B5	0.499027	5.79703	6.33535	0.0118355	0.3648	Up
ENSG00000170043	TRAPPC1	0.441825	6.68968	5.74743	0.0165128	0.375227	Up
ENSG00000170175	CHRNB1	0.295973	3.10783	8.77972	0.00304598	0.296634	Up
ENSG00000170265	ZNF282	0.285747	4.74216	6.09397	0.0135644	0.3648	Up
ENSG00000170275	CRTAP	0.311871	6.92479	7.06361	0.00786652	0.339989	Up
ENSG00000170390	DCLK2	1.01092	-0.353131	10.5536	0.00115963	0.252365	Up
ENSG00000170458	CD14	0.449014	8.82755	5.52012	0.0187989	0.393007	Up
ENSG00000170509	HSD17B13	0.476902	0.562918	5.72634	0.0167123	0.376755	Up
ENSG00000170604	IRF2BP1	0.348643	4.79205	5.80068	0.01602	0.371804	Up
ENSG00000170835	CEL	0.528966	-0.242788	5.58392	0.0181261	0.387636	Up
ENSG00000170889	RPS9	0.538969	9.47857	5.21458	0.0223983	0.423965	Up
ENSG00000170906	NDUFA3	0.499667	5.49672	5.66735	0.0172835	0.380096	Up
ENSG00000171135	JAGN1	0.274236	4.87632	4.45701	0.0347583	0.462584	Up
ENSG00000171159	BBLN	0.570233	6.06507	5.00577	0.025263	0.441127	Up
ENSG00000171222	SCAND1	0.587176	5.2395	6.98277	0.00822982	0.342073	Up
ENSG00000171425	ZNF581	0.485455	4.9478	6.64811	0.00992613	0.359185	Up
ENSG00000171443	ZNF524	0.563844	4.8674	6.93701	0.008443	0.345302	Up
ENSG00000171631	P2RY6	0.434528	1.46748	5.37168	0.0204662	0.408348	Up
ENSG00000171703	TCEA2	0.409954	4.16011	5.33642	0.0208843	0.411114	Up
ENSG00000171786	NHLH1	0.368586	-0.168608	4.44909	0.0349199	0.463486	Up
ENSG00000171813	PWWP2B	0.310645	4.80296	4.32263	0.0376088	0.476626	Up
ENSG00000171953	ATPAF2	0.390207	3.89392	7.1834	0.00735813	0.339302	Up
ENSG00000171984	SHLD1	0.296624	2.92124	4.71322	0.0299316	0.444399	Up
ENSG00000172009	THOP1	0.350475	4.3666	6.04526	0.0139437	0.3648	Up
ENSG00000172232	AZU1	1.23495	2.62276	9.25189	0.00235253	0.296541	Up
ENSG00000172336	POP7	0.323555	3.55187	4.99933	0.0253571	0.441127	Up
ENSG00000172366	MCRIP2	0.487833	4.34454	6.3334	0.0118485	0.3648	Up
ENSG00000172367	PDZD3	0.579861	0.487463	4.658	0.0309092	0.449198	Up
ENSG00000172428	COPS9	0.461014	4.01657	4.35198	0.0369659	0.473184	Up
ENSG00000172500	FIBP	0.463457	5.55041	7.67194	0.00560861	0.312503	Up
ENSG00000172531	PPP1CA	0.31212	8.22016	5.09371	0.0240128	0.438126	Up
ENSG00000172586	CHCHD1	0.347187	4.13163	5.29435	0.0213947	0.41633	Up
ENSG00000172590	MRPL52	0.443335	4.74105	9.54437	0.00200564	0.291695	Up
ENSG00000172663	TMEM134	0.309123	4.72274	5.59585	0.018003	0.386992	Up
ENSG00000172725	CORO1B	0.296651	6.85494	7.26496	0.0070313	0.337104	Up
ENSG00000172731	LRRC20	0.276476	2.03046	3.87339	0.0490574	0.538367	Up
ENSG00000172757	CFL1	0.351295	9.93694	5.92655	0.0149144	0.3648	Up
ENSG00000172824	CES4A	0.301434	2.16269	5.35216	0.0206966	0.409356	Up
ENSG00000172922	RNASEH2C	0.334582	5.32	3.97313	0.0462317	0.523036	Up
ENSG00000172932	ANKRD13D	0.334991	8.06979	6.81651	0.00903191	0.348763	Up
ENSG00000173113	TRMT112	0.456338	5.8682	8.06482	0.00451331	0.301168	Up
ENSG00000173141	MRPL57	0.326824	4.29351	4.60645	0.0318519	0.454581	Up
ENSG00000173163	COMMD1	0.460857	3.39101	7.69517	0.00553689	0.312503	Up
ENSG00000173264	GPR137	0.361554	4.45061	5.70773	0.0168904	0.37869	Up
ENSG00000173272	MZT2A	0.574623	4.59408	6.41366	0.0113246	0.3648	Up
ENSG00000173327	MAP3K11	0.2927	8.11213	4.1478	0.0416887	0.497785	Up
ENSG00000173338	KCNK7	0.459482	1.67776	4.96788	0.0258222	0.441127	Up
ENSG00000173457	PPP1R14B	0.419958	4.09104	4.66029	0.0308681	0.448814	Up
ENSG00000173465	ZNRD2	0.431637	3.75891	7.04537	0.00794702	0.3401	Up
ENSG00000173486	FKBP2	0.629921	-1.67081	4.41347	0.0356562	0.466611	Up
ENSG00000173653	RCE1	0.350486	4.08987	7.17288	0.00740138	0.339302	Up
ENSG00000173786	CNP	0.272981	5.98382	4.19656	0.0405061	0.49367	Up
ENSG00000173928	SWSAP1	0.276319	2.22024	4.74712	0.0293473	0.441955	Up
ENSG00000173991	TCAP	0.752412	1.11405	8.94519	0.00278201	0.296541	Up
ENSG00000173992	CCS	0.506288	5.55552	7.97122	0.0047527	0.302888	Up
ENSG00000174177	CTU2	0.290501	3.1819	5.57704	0.0181975	0.388283	Up
ENSG00000174276	ZNHIT2	0.445711	2.5524	5.47676	0.0192709	0.396743	Up
ENSG00000174326	SLC16A11	0.60381	0.739487	7.18523	0.0073506	0.339302	Up
ENSG00000174564	IL20RB	0.344417	-0.0660696	3.93477	0.0472975	0.529269	Up
ENSG00000174672	BRSK2	0.51678	-0.528479	4.5371	0.0331678	0.456731	Up
ENSG00000174744	BRMS1	0.424962	6.09839	5.70426	0.0169238	0.378874	Up
ENSG00000174775	HRAS	0.444836	3.59239	6.72502	0.00950699	0.354028	Up
ENSG00000174791	RIN1	0.652421	3.52575	9.45424	0.00210661	0.291695	Up
ENSG00000174837	ADGRE1	0.560112	6.0223	11.1994	0.000818254	0.234405	Up
ENSG00000174851	YIF1A	0.483394	4.5817	7.90721	0.00492382	0.304234	Up
ENSG00000174886	NDUFA11	0.491608	4.3155	6.24461	0.0124572	0.3648	Up
ENSG00000174915	PTDSS2	0.395392	4.07218	7.4637	0.00629556	0.326546	Up
ENSG00000174917	MICOS13	0.549644	4.35662	5.92325	0.0149423	0.3648	Up
ENSG00000175061	SNHG29	0.354277	6.06245	4.27673	0.0386376	0.482758	Up
ENSG00000175193	PARL	0.317745	2.26358	4.37088	0.0365582	0.471333	Up
ENSG00000175213	ZNF408	0.328614	4.23775	5.33921	0.0208509	0.41094	Up
ENSG00000175221	MED16	0.331302	6.36353	4.87785	0.0272035	0.441127	Up
ENSG00000175262	C1orf127	0.497984	0.362332	4.52439	0.0334149	0.457032	Up
ENSG00000175294	CATSPER1	0.585737	2.57495	7.2162	0.00722487	0.339302	Up
ENSG00000175334	BANF1	0.386778	5.96137	5.66229	0.0173335	0.380729	Up
ENSG00000175416	CLTB	0.541811	5.63951	7.85837	0.00505861	0.304543	Up
ENSG00000175463	TBC1D10C	0.303133	8.86043	4.17929	0.0409208	0.495108	Up
ENSG00000175467	SART1	0.321826	6.79457	4.78218	0.0287556	0.441127	Up
ENSG00000175482	POLD4	0.314191	4.87437	4.49121	0.0340696	0.459662	Up
ENSG00000175550	DRAP1	0.463566	6.46088	5.40935	0.0200292	0.403738	Up
ENSG00000175567	UCP2	0.350564	8.85241	4.70637	0.030051	0.445087	Up
ENSG00000175573	C11orf68	0.349501	6.25211	5.35447	0.0206692	0.409217	Up
ENSG00000175591	P2RY2	0.413539	3.71581	7.10871	0.00767105	0.339601	Up
ENSG00000175602	CCDC85B	0.574306	5.14542	4.98805	0.0255229	0.441127	Up
ENSG00000175634	RPS6KB2	0.372198	5.90669	5.37385	0.0204408	0.408348	Up
ENSG00000175701	MTLN	0.73292	2.70331	11.4999	0.000695997	0.232159	Up
ENSG00000175756	AURKAIP1	0.51438	6.11435	6.5158	0.010692	0.3648	Up
ENSG00000175826	CTDNEP1	0.324114	6.16855	4.60244	0.0319266	0.454791	Up
ENSG00000175854	SWI5	0.301744	3.04756	4.56991	0.0325383	0.456731	Up
ENSG00000175886	RPL7AP66	0.396444	1.49321	4.53763	0.0331574	0.456731	Up
ENSG00000175920	DOK7	0.48538	1.06414	4.19032	0.0406554	0.494579	Up
ENSG00000176022	B3GALT6	0.318162	4.35463	4.42242	0.0354697	0.466005	Up
ENSG00000176058	TPRN	0.502476	3.62938	8.52294	0.00350698	0.296634	Up
ENSG00000176087	SLC35A4	0.27412	6.62868	5.83205	0.0157367	0.368724	Up
ENSG00000176101	SSNA1	0.479171	5.65808	7.78642	0.00526404	0.307936	Up
ENSG00000176108	CHMP6	0.355914	4.30821	5.43233	0.0197673	0.400882	Up
ENSG00000176340	COX8A	0.494035	5.63078	6.77464	0.0092462	0.351838	Up
ENSG00000176393	RNPEP	0.355419	6.1199	4.05928	0.0439293	0.509866	Up
ENSG00000176410	DNAJC30	0.288256	3.13284	4.10661	0.0427159	0.503707	Up
ENSG00000176476	SGF29	0.438229	4.61669	6.17469	0.012959	0.3648	Up
ENSG00000176845	METRNL	0.309494	5.51616	4.06832	0.0436946	0.508649	Up
ENSG00000176946	THAP4	0.42514	4.59362	9.271	0.0023281	0.296541	Up
ENSG00000176973	FAM89B	0.441699	3.40728	5.03355	0.0248609	0.441127	Up
ENSG00000176978	DPP7	0.484464	7.19582	7.10951	0.00766759	0.339601	Up
ENSG00000177105	RHOG	0.42737	8.93508	5.13136	0.0234973	0.433259	Up
ENSG00000177225	GATD1	0.288922	5.6047	6.43403	0.0111954	0.3648	Up
ENSG00000177369	ENSG00000177369	0.647218	1.63864	11.0567	0.000883686	0.235972	Up
ENSG00000177380	PPFIA3	0.323559	0.906332	5.67606	0.017198	0.379789	Up
ENSG00000177548	RABEP2	0.304235	5.08181	4.20965	0.0401947	0.491443	Up
ENSG00000177556	ATOX1	0.380412	4.65363	5.92691	0.0149114	0.3648	Up
ENSG00000177595	PIDD1	0.450855	4.91633	7.09517	0.0077292	0.339944	Up
ENSG00000177674	AGTRAP	0.432719	7.57681	6.26908	0.0122863	0.3648	Up
ENSG00000177685	CRACR2B	1.07494	2.52594	20.8156	5.06e-06	0.0634234	Up
ENSG00000177697	CD151	0.573178	5.36868	8.97003	0.00274444	0.296541	Up
ENSG00000177700	POLR2L	0.618085	5.49158	8.46389	0.00362267	0.296634	Up
ENSG00000177830	CHID1	0.392599	4.73023	6.85052	0.00886153	0.34863	Up
ENSG00000177854	TMEM187	0.30196	2.88589	3.87902	0.0488931	0.538288	Up
ENSG00000177943	MAMDC4	0.32239	2.87792	5.4362	0.0197236	0.400858	Up
ENSG00000177989	ODF3B	0.513282	6.19855	3.89583	0.0484063	0.535655	Up
ENSG00000178057	NDUFAF3	0.409217	5.04143	5.14052	0.0233736	0.432761	Up
ENSG00000178078	STAP2	0.481383	0.0247712	5.13785	0.0234096	0.432916	Up
ENSG00000178222	RNF212	0.623163	0.597684	4.95936	0.0259499	0.441127	Up
ENSG00000178226	PRSS36	0.516921	1.82656	7.4321	0.00640704	0.328922	Up
ENSG00000178307	TMEM11	0.302224	4.39097	6.71294	0.00957157	0.354306	Up
ENSG00000178449	COX14	0.453299	3.11708	4.8295	0.0279767	0.441127	Up
ENSG00000178605	GTPBP6	0.368988	5.94698	6.54922	0.010493	0.3648	Up
ENSG00000178623	GPR35	0.496866	4.57783	9.12853	0.00251654	0.296541	Up
ENSG00000178685	PARP10	0.409788	7.72097	5.67201	0.0172377	0.37984	Up
ENSG00000178741	COX5A	0.351697	5.41136	6.55932	0.0104336	0.3639	Up
ENSG00000178952	TUFM	0.307245	6.82162	5.61344	0.0178233	0.38528	Up
ENSG00000178980	SELENOW	0.333562	5.94396	4.61417	0.0317089	0.45347	Up
ENSG00000178982	EIF3K	0.377682	7.59475	4.7882	0.0286553	0.441127	Up
ENSG00000179044	EXOC3L1	0.89503	2.01217	5.20036	0.0225823	0.425712	Up
ENSG00000179085	DPM3	0.651623	3.49836	8.37939	0.003795	0.296634	Up
ENSG00000179091	CYC1	0.45882	5.91863	6.96275	0.0083224	0.343354	Up
ENSG00000179094	PER1	0.417871	5.33487	6.14476	0.0131802	0.3648	Up
ENSG00000179115	FARSA	0.369563	5.19715	6.91552	0.00854506	0.346116	Up
ENSG00000179593	ALOX15B	0.561655	1.13079	4.15409	0.0415341	0.497518	Up
ENSG00000179627	ZBTB42	0.311476	3.15251	8.30126	0.00396175	0.296634	Up
ENSG00000179632	MAF1	0.340783	7.11294	3.99582	0.0456133	0.519697	Up
ENSG00000179698	WDR97	0.692624	1.88187	7.92992	0.00486238	0.303403	Up
ENSG00000179832	MROH1	0.317144	5.62583	7.28987	0.00693444	0.336908	Up
ENSG00000179862	CITED4	0.652845	2.66637	7.69812	0.00552782	0.312503	Up
ENSG00000179886	TIGD5	0.27486	3.22631	4.41796	0.0355626	0.466005	Up
ENSG00000179921	GPBAR1	0.716239	5.21131	13.4456	0.000245579	0.185388	Up
ENSG00000179922	ZNF784	0.438946	3.19676	6.48087	0.0109042	0.3648	Up
ENSG00000179950	PUF60	0.354919	6.83744	6.39417	0.0114495	0.3648	Up
ENSG00000179965	ZNF771	0.375133	0.376074	4.29717	0.0381759	0.479581	Up
ENSG00000179967	PPP1R14BP3	0.482308	1.53306	5.44172	0.0196612	0.400785	Up
ENSG00000180061	TMEM150B	0.478099	3.40392	7.35052	0.00670432	0.333128	Up
ENSG00000180071	ANKRD18A	0.538558	1.91901	7.80806	0.00520138	0.307936	Up
ENSG00000180089	TMEM86B	0.50518	3.19495	5.30628	0.0212487	0.415197	Up
ENSG00000180209	MYLPF	0.902538	-0.773986	14.733	0.000123863	0.173858	Up
ENSG00000180279	LINC01869	0.67216	-1.46663	4.64412	0.0311602	0.450036	Up
ENSG00000180340	FZD2	0.540298	2.92261	7.86722	0.0050339	0.304543	Up
ENSG00000180549	FUT7	0.482349	5.39997	4.84749	0.0276864	0.441127	Up
ENSG00000180767	CHST13	0.748178	3.27639	6.09272	0.013574	0.3648	Up
ENSG00000180879	SSR4	0.496629	6.87705	4.88232	0.0271331	0.441127	Up
ENSG00000180891	CUEDC1	0.346248	5.31906	4.20481	0.0403095	0.49227	Up
ENSG00000180902	D2HGDH	0.615171	4.98105	13.0808	0.000298331	0.186628	Up
ENSG00000180992	MRPL14	0.397068	3.59518	4.97244	0.0257543	0.441127	Up
ENSG00000181097	LINC02878	0.392922	0.494125	4.44146	0.0350763	0.464136	Up
ENSG00000181284	TMEM102	0.469924	3.08206	8.95185	0.00277189	0.296541	Up
ENSG00000181392	SYNE4	0.287568	0.727083	4.09006	0.043136	0.506263	Up
ENSG00000181404	WASHC1	0.755777	4.63529	6.34234	0.0117889	0.3648	Up
ENSG00000181444	ZNF467	0.353756	6.96607	4.18143	0.0408693	0.495108	Up
ENSG00000181790	ADGRB1	0.535154	1.44032	13.9097	0.000191809	0.173858	Up
ENSG00000182004	SNRPE	0.368371	3.0892	6.84757	0.0088762	0.34863	Up
ENSG00000182054	IDH2	0.329192	6.2823	5.83948	0.0156705	0.368327	Up
ENSG00000182154	MRPL41	0.689861	4.74042	8.02712	0.00460821	0.301168	Up
ENSG00000182165	TP53TG1	0.320237	1.41098	5.02908	0.0249252	0.441127	Up
ENSG00000182196	ARL6IP4	0.684383	0.340202	8.1983	0.00419296	0.296634	Up
ENSG00000182199	SHMT2	0.263113	5.86422	4.32656	0.0375221	0.476204	Up
ENSG00000182208	MOB2	0.379613	5.69091	6.20447	0.0127428	0.3648	Up
ENSG00000182240	BACE2	0.447896	3.40955	8.53486	0.00348408	0.296634	Up
ENSG00000182310	SPACA6	0.66252	2.39449	7.28603	0.00694929	0.336908	Up
ENSG00000182379	NXPH4	0.806077	0.078717	5.84158	0.0156518	0.368026	Up
ENSG00000182511	FES	0.323267	7.43844	4.54391	0.033036	0.456731	Up
ENSG00000182544	MFSD5	0.278231	5.37095	4.94561	0.0261571	0.441127	Up
ENSG00000182557	SPNS3	0.98809	3.86659	17.5169	2.85e-05	0.109982	Up
ENSG00000182578	CSF1R	0.308574	7.70816	4.91205	0.02667	0.441127	Up
ENSG00000182600	SNORC	0.439546	0.519564	4.35395	0.0369232	0.473126	Up
ENSG00000182685	BRICD5	0.654463	2.71341	8.8477	0.00293459	0.296541	Up
ENSG00000182718	ANXA2	0.329197	8.30132	6.07741	0.0136921	0.3648	Up
ENSG00000182749	PAQR7	0.459002	3.6788	9.34772	0.00223264	0.293467	Up
ENSG00000182809	CRIP2	0.638039	4.16794	4.81682	0.0281833	0.441127	Up
ENSG00000183011	NAA38	0.558307	4.24077	5.25326	0.0219057	0.420901	Up
ENSG00000183087	GAS6	0.312749	3.12278	4.71354	0.0299261	0.444399	Up
ENSG00000183111	ARHGEF37	1.5031	0.767782	8.83343	0.00295761	0.296634	Up
ENSG00000183134	PTGDR2	0.852937	4.58728	13.4483	0.000245228	0.185388	Up
ENSG00000183172	SMDT1	0.476309	5.41131	6.0186	0.0141559	0.3648	Up
ENSG00000183207	RUVBL2	0.419909	5.07319	6.37194	0.0115939	0.3648	Up
ENSG00000183258	DDX41	0.35534	6.26353	5.94121	0.0147909	0.3648	Up
ENSG00000183298	RPSAP19	0.558747	5.13197	4.89611	0.0269172	0.441127	Up
ENSG00000183401	CCDC159	0.455658	5.47877	6.68846	0.0097039	0.356075	Up
ENSG00000183444	OR7E38P	0.507036	-1.48618	5.1451	0.0233121	0.432004	Up
ENSG00000183479	TREX2	0.546914	1.35776	6.2073	0.0127225	0.3648	Up
ENSG00000183617	MRPL54	0.547797	4.56867	5.76442	0.0163539	0.373164	Up
ENSG00000183625	CCR3	0.504004	6.58948	5.48479	0.0191826	0.395835	Up
ENSG00000183684	ALYREF	0.324356	4.78949	5.94362	0.0147706	0.3648	Up
ENSG00000183734	ASCL2	0.529003	3.22292	5.14526	0.02331	0.432004	Up
ENSG00000183751	TBL3	0.37132	5.00095	5.84446	0.0156262	0.367837	Up
ENSG00000183779	ZNF703	0.349614	3.58617	4.3029	0.0380473	0.479202	Up
ENSG00000183828	NUDT14	0.467498	3.04404	5.43645	0.0197208	0.400858	Up
ENSG00000183837	PNMA3	0.620817	3.84751	5.53883	0.018599	0.392049	Up
ENSG00000183963	SMTN	0.336316	1.96016	6.76964	0.00927214	0.351983	Up
ENSG00000183978	COA3	0.429986	4.06412	6.06337	0.0138014	0.3648	Up
ENSG00000184163	C1QTNF12	0.737056	-0.200485	7.19288	0.00731935	0.339302	Up
ENSG00000184221	OLIG1	0.667185	4.47696	13.1346	0.000289892	0.186628	Up
ENSG00000184281	TSSC4	0.468875	5.67158	6.59265	0.0102401	0.362405	Up
ENSG00000184436	THAP7	0.391323	4.81462	5.58354	0.0181301	0.387636	Up
ENSG00000184470	TXNRD2	0.434507	5.17233	10.007	0.00155946	0.272793	Up
ENSG00000184489	PTP4A3	0.445888	6.14299	5.59682	0.0179931	0.386992	Up
ENSG00000184497	TMEM255B	0.479307	0.700434	5.78004	0.0162092	0.371838	Up
ENSG00000184584	STING1	0.326948	7.12818	6.8286	0.00897093	0.34863	Up
ENSG00000184831	APOO	0.273493	1.58458	4.15546	0.0415005	0.497518	Up
ENSG00000184840	TMED9	0.293437	6.67198	6.22214	0.0126162	0.3648	Up
ENSG00000184956	MUC6	0.867114	-0.411317	6.77711	0.00923345	0.351705	Up
ENSG00000184967	NOC4L	0.592806	4.07688	8.97894	0.00273109	0.296541	Up
ENSG00000184979	USP18	0.93367	2.90864	4.85888	0.0275041	0.441127	Up
ENSG00000184990	SIVA1	0.334859	5.61555	4.56577	0.0326169	0.456731	Up
ENSG00000185000	DGAT1	0.347448	6.45163	4.44825	0.034937	0.463486	Up
ENSG00000185085	INTS5	0.304303	4.85801	5.21847	0.0223482	0.423756	Up
ENSG00000185101	ANO9	0.367943	6.12303	6.45423	0.0110688	0.3648	Up
ENSG00000185122	HSF1	0.284333	6.16786	5.43258	0.0197644	0.400882	Up
ENSG00000185187	SIGIRR	0.453704	7.37676	7.5611	0.00596414	0.320037	Up
ENSG00000185262	UBALD2	0.333313	7.2244	4.39686	0.0360052	0.467761	Up
ENSG00000185347	TEDC1	0.48771	3.82493	8.31269	0.0039369	0.296634	Up
ENSG00000185475	TMEM179B	0.296719	4.62474	5.18104	0.0228347	0.427962	Up
ENSG00000185482	STAC3	0.538051	4.05288	8.84419	0.00294024	0.296541	Up
ENSG00000185499	MUC1	0.501334	0.403636	4.80721	0.0283408	0.441127	Up
ENSG00000185522	LMNTD2	0.437618	2.1878	5.99729	0.0143279	0.3648	Up
ENSG00000185608	MRPL40	0.452209	3.01029	6.96471	0.00831328	0.343354	Up
ENSG00000185614	INKA1	0.616052	1.72769	8.21979	0.0041436	0.296634	Up
ENSG00000185627	PSMD13	0.349656	7.12463	6.22919	0.0125661	0.3648	Up
ENSG00000185641	ENSG00000185641	0.42613	3.28888	3.99725	0.0455745	0.519643	Up
ENSG00000185669	SNAI3	0.398396	4.91641	4.9394	0.0262512	0.441127	Up
ENSG00000185803	SLC52A2	0.352662	4.06339	9.45579	0.00210484	0.291695	Up
ENSG00000185813	PCYT2	0.308177	4.51368	4.57485	0.0324446	0.456731	Up
ENSG00000185825	BCAP31	0.394036	7.5413	7.5014	0.00616511	0.324124	Up
ENSG00000185838	GNB1L	0.400644	2.63754	6.98174	0.00823456	0.342073	Up
ENSG00000185909	KLHDC8B	0.684391	4.59884	8.37064	0.00381331	0.296634	Up
ENSG00000185955	C7orf61	0.655608	0.207011	9.72427	0.00181851	0.286666	Up
ENSG00000186187	ZNRF1	0.270333	2.66177	5.47142	0.0193299	0.397439	Up
ENSG00000186204	CYP4F12	0.497041	2.63739	5.15163	0.0232246	0.431147	Up
ENSG00000186407	CD300E	0.349991	7.5275	4.48305	0.0342325	0.46016	Up
ENSG00000186501	TMEM222	0.335268	6.24336	4.28585	0.0384308	0.481903	Up
ENSG00000186567	CEACAM19	0.524346	2.23188	5.29971	0.0213289	0.415798	Up
ENSG00000186577	SMIM29	0.342736	4.66545	5.505	0.0189622	0.393618	Up
ENSG00000186810	CXCR3	0.367002	4.48202	4.68919	0.0303529	0.446514	Up
ENSG00000186818	LILRB4	0.422399	5.25297	5.6485	0.0174703	0.381861	Up
ENSG00000186827	TNFRSF4	0.52897	3.62292	4.60974	0.0317909	0.454167	Up
ENSG00000186891	TNFRSF18	0.665315	3.09325	6.2636	0.0123244	0.3648	Up
ENSG00000187051	RPS19BP1	0.432804	5.50443	6.36621	0.0116314	0.3648	Up
ENSG00000187066	TMEM262	0.453999	-1.12615	4.67037	0.0306872	0.447443	Up
ENSG00000187608	ISG15	1.08571	7.11005	5.73446	0.0166352	0.376467	Up
ENSG00000187630	DHRS4L2	0.52301	3.87283	8.87434	0.00289207	0.296541	Up
ENSG00000187688	TRPV2	0.316995	6.2421	9.38692	0.00218539	0.292833	Up
ENSG00000187778	MCRS1	0.277522	6.27829	4.66964	0.0307004	0.447443	Up
ENSG00000187796	CARD9	0.384266	2.23376	5.83097	0.0157465	0.368724	Up
ENSG00000187840	EIF4EBP1	0.669515	4.49185	9.38896	0.00218295	0.292833	Up
ENSG00000188051	TMEM221	0.585653	-1.10609	4.54127	0.0330871	0.456731	Up
ENSG00000188186	LAMTOR4	0.506175	7.54121	6.95273	0.00836915	0.343825	Up
ENSG00000188290	HES4	0.849911	2.20117	6.15395	0.0131119	0.3648	Up
ENSG00000188368	PRR19	0.696941	-1.58054	5.87728	0.0153375	0.365439	Up
ENSG00000188383	GPAT2P2	0.94684	-1.61252	14.6234	0.000131275	0.173858	Up
ENSG00000188486	H2AX	0.359724	4.24393	4.6999	0.0301644	0.445713	Up
ENSG00000188747	NOXA1	0.724772	3.34251	11.7804	0.000598563	0.21756	Up
ENSG00000188878	FBF1	0.286839	2.99885	4.15422	0.0415308	0.497518	Up
ENSG00000188986	NELFB	0.320063	6.06969	6.96329	0.00831987	0.343354	Up
ENSG00000189068	VSTM1	0.540511	4.6338	3.8909	0.0485483	0.536345	Up
ENSG00000189077	TMEM120A	0.454834	6.15686	4.85232	0.027609	0.441127	Up
ENSG00000189114	BLOC1S3	0.276908	5.22566	5.17102	0.0229667	0.428925	Up
ENSG00000189171	S100A13	0.375117	0.741554	4.31268	0.0378293	0.477974	Up
ENSG00000196154	S100A4	0.548349	9.77541	6.88549	0.00868983	0.347759	Up
ENSG00000196183	RPS2P4	0.74453	-0.0390235	7.78917	0.00525604	0.307936	Up
ENSG00000196262	PPIA	0.301377	8.6441	3.88044	0.0488517	0.538154	Up
ENSG00000196415	PRTN3	1.47109	0.671264	8.20305	0.004182	0.296634	Up
ENSG00000196456	ZNF775	0.427741	2.49839	5.36135	0.0205879	0.408526	Up
ENSG00000196642	RABL6	0.438853	6.28418	7.77305	0.00530314	0.308497	Up
ENSG00000196668	LINC00173	0.445078	3.85221	5.51796	0.0188221	0.393256	Up
ENSG00000196683	TOMM7	0.54388	5.39168	5.23769	0.0221027	0.422579	Up
ENSG00000196878	LAMB3	0.407224	-0.219164	5.38977	0.0202552	0.406079	Up
ENSG00000196923	PDLIM7	0.412761	7.70647	4.28018	0.0385594	0.482391	Up
ENSG00000196976	LAGE3	0.430735	3.7345	5.23058	0.0221931	0.422978	Up
ENSG00000197019	SERTAD1	0.483165	4.3022	7.9237	0.00487913	0.303544	Up
ENSG00000197043	ANXA6	0.320841	8.75692	5.99262	0.0143658	0.3648	Up
ENSG00000197070	ARRDC1	0.519335	6.57195	11.1608	0.000835443	0.235972	Up
ENSG00000197182	MIRLET7BHG	0.478673	3.1896	5.69999	0.0169651	0.378897	Up
ENSG00000197345	MRPL21	0.440825	3.78643	5.17491	0.0229153	0.428833	Up
ENSG00000197448	GSTK1	0.320903	8.17235	5.3438	0.0207961	0.410102	Up
ENSG00000197457	STMN3	0.359839	6.27685	6.84061	0.00891085	0.34863	Up
ENSG00000197540	GZMM	0.480279	6.13217	4.85801	0.0275181	0.441127	Up
ENSG00000197561	ELANE	0.936836	2.19221	5.2644	0.0217659	0.42037	Up
ENSG00000197562	RAB40C	0.333106	5.10321	6.73786	0.00943879	0.353393	Up
ENSG00000197599	CCDC154	0.388605	1.8551	4.98458	0.0255742	0.441127	Up
ENSG00000197746	PSAP	0.302924	11.5129	5.19423	0.0226619	0.426435	Up
ENSG00000197785	ATAD3A	0.529592	3.96254	9.57678	0.00197054	0.291695	Up
ENSG00000197816	CCDC180	0.327951	1.56475	5.42462	0.0198548	0.401772	Up
ENSG00000197847	SLC22A20P	0.503631	-0.677062	5.90977	0.0150572	0.3648	Up
ENSG00000197858	GPAA1	0.532547	5.30822	8.21541	0.00415361	0.296634	Up
ENSG00000197956	S100A6	0.423334	9.78974	4.06362	0.0438165	0.509218	Up
ENSG00000197982	C1orf122	0.527668	3.98742	6.22863	0.0125701	0.3648	Up
ENSG00000198003	ODAD3	0.552187	-0.381663	4.4771	0.0343521	0.460795	Up
ENSG00000198171	DDRGK1	0.397997	5.05329	8.58493	0.00338956	0.296634	Up
ENSG00000198258	UBL5	0.44017	6.06776	4.41692	0.0355842	0.466005	Up
ENSG00000198324	PHETA1	0.33864	3.8854	5.59603	0.0180012	0.386992	Up
ENSG00000198356	GET3	0.333425	5.84269	5.37206	0.0204618	0.408348	Up
ENSG00000198400	NTRK1	0.597364	0.570795	7.11528	0.00764297	0.339601	Up
ENSG00000198417	MT1F	0.588806	2.36041	8.73	0.00313016	0.296634	Up
ENSG00000198520	ARMH1	0.407677	5.14531	5.11571	0.0237102	0.434913	Up
ENSG00000198546	ZNF511	0.345738	2.75287	4.8917	0.0269861	0.441127	Up
ENSG00000198715	GLMP	0.375529	4.48337	5.13148	0.0234956	0.433259	Up
ENSG00000198746	GPATCH3	0.311067	4.28277	7.17439	0.00739516	0.339302	Up
ENSG00000198816	ZNF358	0.554601	2.4606	5.91545	0.0150087	0.3648	Up
ENSG00000198832	SELENOM	0.46817	3.53542	4.46716	0.0345524	0.461451	Up
ENSG00000198848	CES1	0.876739	4.75822	6.1618	0.0130538	0.3648	Up
ENSG00000198931	APRT	0.543736	6.99597	7.60091	0.00583388	0.317015	Up
ENSG00000198951	NAGA	0.263448	6.59883	5.30797	0.0212281	0.415096	Up
ENSG00000199753	SNORD104	0.980287	0.0251841	11.2953	0.000777022	0.232369	Up
ENSG00000203950	RTL8A	0.321665	3.8046	5.71793	0.0167925	0.377364	Up
ENSG00000204220	PFDN6	0.350892	4.14143	5.14579	0.0233027	0.432004	Up
ENSG00000204227	RING1	0.299453	5.47712	5.00752	0.0252375	0.441127	Up
ENSG00000204228	HSD17B8	0.514277	3.39159	6.31615	0.0119643	0.3648	Up
ENSG00000204237	OXLD1	0.325144	4.97771	4.31256	0.0378319	0.477974	Up
ENSG00000204272	NBDY	0.315546	4.22947	4.68457	0.0304347	0.446514	Up
ENSG00000204305	AGER	0.439544	6.13921	4.78986	0.0286277	0.441127	Up
ENSG00000204308	RNF5	0.365007	5.40269	6.76624	0.00928982	0.351983	Up
ENSG00000204356	NELFE	0.352563	5.93372	4.94049	0.0262346	0.441127	Up
ENSG00000204394	VARS1	0.275792	5.7501	4.31131	0.0378598	0.477974	Up
ENSG00000204428	LY6G5C	0.497547	2.66941	9.26264	0.00233876	0.296541	Up
ENSG00000204438	GPANK1	0.324793	4.98803	4.58373	0.0322769	0.456218	Up
ENSG00000204444	APOM	0.393378	1.12483	4.76574	0.0290316	0.441127	Up
ENSG00000204472	AIF1	0.425705	7.59518	4.11808	0.0424271	0.50241	Up
ENSG00000204498	NFKBIL1	0.410808	3.44941	5.66661	0.0172908	0.380096	Up
ENSG00000204536	CCHCR1	0.37879	4.13018	7.13365	0.00756508	0.339302	Up
ENSG00000204584	ENSG00000204584	0.370759	2.09173	3.96709	0.046398	0.524255	Up
ENSG00000204613	TRIM10	0.848212	2.44567	4.35561	0.0368873	0.473126	Up
ENSG00000204628	RACK1	0.366271	10.2485	4.06749	0.0437162	0.508711	Up
ENSG00000204673	AKT1S1	0.340377	4.99549	4.56434	0.0326443	0.456731	Up
ENSG00000204859	ZBTB48	0.347752	6.04136	5.54625	0.0185203	0.390999	Up
ENSG00000205078	SYCE1L	0.512274	0.468687	4.38871	0.0361777	0.469225	Up
ENSG00000205155	PSENEN	0.43603	4.45278	4.2069	0.0402599	0.491809	Up
ENSG00000205220	PSMB10	0.442198	6.41504	5.69639	0.0169998	0.378897	Up
ENSG00000205426	KRT81	0.568276	-0.958732	4.15009	0.0416324	0.497785	Up
ENSG00000205593	DENND6B	0.509863	3.46698	7.44649	0.00635601	0.328054	Up
ENSG00000205609	EIF3CL	0.563998	6.07243	8.7154	0.00315533	0.296634	Up
ENSG00000205629	LCMT1	0.269991	4.33802	4.44856	0.0349307	0.463486	Up
ENSG00000205643	CDPF1	0.351243	3.13576	6.92078	0.00852	0.346042	Up
ENSG00000205744	DENND1C	0.354718	7.49754	6.73734	0.00944152	0.353393	Up
ENSG00000205927	OLIG2	0.878866	2.27757	8.16643	0.00426728	0.297371	Up
ENSG00000206047	DEFA1	1.31224	1.72219	8.11801	0.00438277	0.301168	Up
ENSG00000206140	TMEM191C	0.518443	0.223301	4.45299	0.0348402	0.463182	Up
ENSG00000206341	HLA-H	0.437998	4.77858	6.7495	0.00937738	0.352629	Up
ENSG00000206503	HLA-A	0.448649	11.12	8.93317	0.00280038	0.296541	Up
ENSG00000211450	SELENOH	0.303263	3.20746	5.29517	0.0213846	0.41633	Up
ENSG00000211584	SLC48A1	0.332056	4.85306	4.07298	0.0435743	0.508325	Up
ENSG00000211724	TRBV6-6	0.356385	1.99691	4.98859	0.0255151	0.441127	Up
ENSG00000211772	TRBC2	0.444439	8.82544	4.08334	0.043308	0.50667	Up
ENSG00000211816	TRAV38-1	0.353209	0.968677	3.95185	0.0468199	0.526916	Up
ENSG00000211820	TRAV41	0.475557	1.39906	5.22165	0.0223074	0.423484	Up
ENSG00000212694	LINC01089	0.524836	5.77661	6.62045	0.0100814	0.360974	Up
ENSG00000213015	ZNF580	0.456508	5.17638	6.09672	0.0135433	0.3648	Up
ENSG00000213123	DYNLT2B	0.499096	-0.830389	9.1119	0.00253951	0.296541	Up
ENSG00000213145	CRIP1	0.591191	3.94717	7.36363	0.00665563	0.332835	Up
ENSG00000213213	CCDC183	0.289105	0.329473	4.54306	0.0330524	0.456731	Up
ENSG00000213261	EEF1B2P6	0.4923	1.41788	3.84278	0.0499606	0.544307	Up
ENSG00000213293	ENSG00000213293	0.783083	0.289009	7.49137	0.00619953	0.324124	Up
ENSG00000213316	LTC4S	0.648143	2.23849	8.13608	0.00433929	0.300007	Up
ENSG00000213398	LCAT	0.406797	3.49015	5.60589	0.0179002	0.386143	Up
ENSG00000213442	RPL18AP3	0.518805	5.78621	4.05397	0.0440676	0.510172	Up
ENSG00000213465	ARL2	0.591934	3.75631	8.47264	0.00360528	0.296634	Up
ENSG00000213523	SRA1	0.355333	5.69655	3.85582	0.0495736	0.541721	Up
ENSG00000213563	C8orf82	0.34164	3.4337	5.24697	0.021985	0.421651	Up
ENSG00000213619	NDUFS3	0.358398	5.10379	4.33945	0.0372389	0.474548	Up
ENSG00000213654	GPSM3	0.327594	9.62255	3.8923	0.048508	0.536118	Up
ENSG00000213722	DDAH2	0.425735	5.39663	5.91776	0.014989	0.3648	Up
ENSG00000213999	MEF2B	0.529513	-0.383275	4.97261	0.0257518	0.441127	Up
ENSG00000214063	TSPAN4	0.448804	4.1149	5.85703	0.0155149	0.367267	Up
ENSG00000214078	CPNE1	0.283406	7.42036	4.05658	0.0439995	0.510162	Up
ENSG00000214113	LYRM4	0.342618	3.55048	5.50644	0.0189465	0.393553	Up
ENSG00000214160	ALG3	0.41319	4.7203	6.49215	0.0108352	0.3648	Up
ENSG00000214212	C19orf38	0.459228	6.80025	6.50749	0.0107421	0.3648	Up
ENSG00000214274	ANG	0.597648	0.611945	5.53007	0.0186923	0.392827	Up
ENSG00000214309	MBLAC1	0.580366	0.032929	9.23645	0.00237244	0.296541	Up
ENSG00000214401	KANSL1-AS1	0.701673	1.63616	6.57746	0.0103278	0.362412	Up
ENSG00000214548	MEG3	1.05999	2.3023	5.51044	0.0189033	0.393319	Up
ENSG00000214787	MS4A4E	0.344943	3.20163	6.03479	0.0140267	0.3648	Up
ENSG00000214826	DDX12P	1.0942	3.1244	10.6045	0.00112813	0.252365	Up
ENSG00000214967	NPIPA7	0.581014	-0.336571	4.5833	0.032285	0.456218	Up
ENSG00000215375	MYL5	0.338869	3.66147	4.49193	0.0340553	0.459567	Up
ENSG00000215440	NPEPL1	0.366208	4.95774	4.57993	0.0323485	0.45627	Up
ENSG00000215458	AATBC	0.32338	4.83693	4.58387	0.0322742	0.456218	Up
ENSG00000215845	TSTD1	0.358419	4.87298	4.31171	0.0378509	0.477974	Up
ENSG00000217094	PPIAP31	0.845356	1.44929	7.85562	0.0050663	0.304543	Up
ENSG00000217130	ENSG00000217130	0.634055	2.2667	4.69721	0.0302116	0.446096	Up
ENSG00000217325	PRELID1P1	0.543487	-0.236828	4.5275	0.0333544	0.456998	Up
ENSG00000218052	ADAMTS7P4	0.591428	0.305053	5.37238	0.020458	0.408348	Up
ENSG00000218891	ZNF579	0.416813	2.6709	4.00202	0.0454457	0.519107	Up
ENSG00000220161	LINC02076	0.530225	-1.49944	3.90172	0.0482368	0.534535	Up
ENSG00000220201	ZGLP1	0.601652	0.942755	7.45925	0.00631113	0.326813	Up
ENSG00000221539	SNORD99	0.477355	-0.571742	4.90161	0.0268317	0.441127	Up
ENSG00000221821	C6orf226	0.35833	2.41555	5.69362	0.0170267	0.378897	Up
ENSG00000221946	FXYD7	0.5455	1.31157	7.02669	0.00803036	0.340815	Up
ENSG00000222037	IGLC6	0.763197	-0.502983	4.11632	0.0424715	0.50241	Up
ENSG00000222057	RNU4-62P	1.0585	-0.069488	6.07984	0.0136734	0.3648	Up
ENSG00000223749	MIR503HG	0.484554	-0.468352	7.25759	0.00706021	0.337459	Up
ENSG00000223865	HLA-DPB1	0.425256	8.19274	3.94111	0.0471198	0.528602	Up
ENSG00000224051	CPTP	0.349073	5.01832	4.15992	0.0413914	0.496977	Up
ENSG00000224126	UBE2SP2	0.695515	-1.54697	5.02114	0.0250397	0.441127	Up
ENSG00000224137	LINC01857	0.599912	1.33938	5.94477	0.014761	0.3648	Up
ENSG00000224321	RPL12P14	0.660083	-0.405295	5.77562	0.01625	0.371868	Up
ENSG00000224383	PRR29	0.315724	2.52595	4.78209	0.0287572	0.441127	Up
ENSG00000224420	ADM5	0.706688	-0.763265	8.04469	0.00456373	0.301168	Up
ENSG00000224614	TNK2-AS1	0.41935	1.18428	4.99571	0.0254102	0.441127	Up
ENSG00000224858	RPL29P11	0.480945	0.396236	4.67524	0.0306005	0.4471	Up
ENSG00000224877	NDUFAF8	0.446696	2.93886	6.3527	0.0117203	0.3648	Up
ENSG00000224892	RPS4XP16	0.338187	0.702837	3.85686	0.0495429	0.541721	Up
ENSG00000225177	ENSG00000225177	0.672216	1.28062	9.21263	0.00240351	0.296541	Up
ENSG00000225200	ENSG00000225200	0.467885	2.16477	4.54538	0.0330077	0.456731	Up
ENSG00000225434	LINC01504	0.290963	2.01921	5.19029	0.0227135	0.426647	Up
ENSG00000225573	RPL35P5	1.37047	-1.16416	10.4158	0.00124945	0.25774	Up
ENSG00000225643	ENSG00000225643	0.615316	-1.16475	7.04086	0.0079671	0.340107	Up
ENSG00000225663	MCRIP1	0.575053	5.88621	7.27362	0.00699748	0.336908	Up
ENSG00000225964	NRIR	0.955573	2.20441	4.30175	0.0380732	0.479335	Up
ENSG00000226174	TEX22	0.420188	0.809546	8.35635	0.00384341	0.296634	Up
ENSG00000226252	ENSG00000226252	0.934859	-0.893786	6.23332	0.0125369	0.3648	Up
ENSG00000226266	ENSG00000226266	0.568261	-0.854555	8.62065	0.00332374	0.296634	Up
ENSG00000226415	TPI1P1	0.336543	2.52499	3.89087	0.0485494	0.536345	Up
ENSG00000226471	ENSG00000226471	0.425762	0.0932488	5.20534	0.0225176	0.425452	Up
ENSG00000226564	FTH1P20	0.668158	1.27108	5.00416	0.0252865	0.441127	Up
ENSG00000226824	ENSG00000226824	0.413186	1.17685	5.91157	0.0150418	0.3648	Up
ENSG00000226862	ENSG00000226862	0.616549	0.522445	5.37252	0.0204565	0.408348	Up
ENSG00000226976	COX6A1P2	0.41974	1.20362	4.63426	0.0313396	0.450479	Up
ENSG00000226986	PRELID1P5	0.635048	-0.621263	6.74268	0.0094133	0.353266	Up
ENSG00000227057	WDR46	0.321767	5.54443	5.51457	0.0188587	0.393319	Up
ENSG00000227507	LTB	0.438469	8.98564	4.89043	0.0270059	0.441127	Up
ENSG00000227512	ENSG00000227512	0.861222	0.3231	6.57008	0.0103707	0.362874	Up
ENSG00000227525	RPL7P6	0.797163	-1.67039	6.3128	0.0119869	0.3648	Up
ENSG00000227527	ENSG00000227527	0.525376	-1.87974	4.21772	0.0400039	0.490821	Up
ENSG00000227740	LINC02803	0.588648	-0.882875	6.45464	0.0110663	0.3648	Up
ENSG00000227953	LINC01341	0.531231	-0.990102	5.10973	0.023792	0.435873	Up
ENSG00000228278	ORM2	0.507341	2.35451	6.25296	0.0123986	0.3648	Up
ENSG00000228300	FAM174C	0.559534	4.82407	6.75384	0.00935459	0.35254	Up
ENSG00000228305	PRELID1P6	0.450097	4.34438	6.34197	0.0117914	0.3648	Up
ENSG00000228427	ENSG00000228427	0.483841	1.88769	12.4647	0.00041472	0.193989	Up
ENSG00000228519	RANBP1P1	0.488324	0.0144467	5.99689	0.0143311	0.3648	Up
ENSG00000228541	ENSG00000228541	0.980268	-0.524043	7.00624	0.00812261	0.341629	Up
ENSG00000228594	FNDC10	0.499665	2.60448	5.9017	0.0151263	0.364815	Up
ENSG00000228847	ATP5MC2P4	0.607746	0.226976	8.49241	0.00356631	0.296634	Up
ENSG00000228887	EEF1DP1	0.624297	0.145197	6.29353	0.012118	0.3648	Up
ENSG00000229132	EIF4A1P10	0.398967	3.44857	6.58836	0.0102648	0.362412	Up
ENSG00000229671	LINC01150	0.61079	-0.700779	5.30527	0.021261	0.415197	Up
ENSG00000229809	ZNF688	0.465993	4.12484	5.46491	0.019402	0.398075	Up
ENSG00000229833	PET100	0.514068	2.13244	7.36678	0.00664398	0.332677	Up
ENSG00000229980	TOB1-AS1	0.277642	-0.0640904	3.88128	0.0488272	0.538034	Up
ENSG00000230082	PRRT3-AS1	0.550908	-1.58334	5.10038	0.0239206	0.437208	Up
ENSG00000230155	CEP250-AS1	0.31737	-0.183576	3.861	0.049421	0.540776	Up
ENSG00000230185	HSDL2-AS1	0.536606	-1.30591	4.96231	0.0259056	0.441127	Up
ENSG00000230454	ENSG00000230454	0.785516	-0.395464	7.53981	0.00603504	0.321547	Up
ENSG00000230587	LINC02580	0.284599	1.80043	4.46142	0.0346687	0.462016	Up
ENSG00000230979	ENSG00000230979	0.722984	5.17451	6.10288	0.0134962	0.3648	Up
ENSG00000231351	WBP1P1	0.409275	-0.138228	4.25623	0.0391066	0.485859	Up
ENSG00000231663	COA6-AS1	0.430651	0.305733	4.25826	0.0390598	0.485615	Up
ENSG00000231680	LINC02723	0.480194	1.953	4.96085	0.0259274	0.441127	Up
ENSG00000232112	TMA7	0.485952	2.87504	5.992	0.0143709	0.3648	Up
ENSG00000232442	MHENCR	0.464566	5.23802	5.47836	0.0192533	0.396743	Up
ENSG00000232573	RPL3P4	0.598902	6.03078	7.05481	0.00790529	0.339989	Up
ENSG00000233223	ENSG00000233223	0.552858	1.82052	13.2276	0.000275858	0.186628	Up
ENSG00000233254	RPL21P134	0.608166	-0.893576	4.24376	0.0393948	0.487023	Up
ENSG00000233328	PFN1P1	0.423303	4.81262	5.05966	0.024489	0.441127	Up
ENSG00000233493	TMEM238	0.709497	0.759408	6.25704	0.0123701	0.3648	Up
ENSG00000233622	CYP2T1P	0.430413	2.13825	4.22116	0.0399229	0.490318	Up
ENSG00000233762	RPS15P4	0.628345	5.24029	5.95983	0.0146354	0.3648	Up
ENSG00000233837	EIF3LP2	0.535432	-1.19729	4.589	0.0321778	0.456004	Up
ENSG00000233870	ENSG00000233870	0.565433	-1.14157	5.22146	0.0223098	0.423484	Up
ENSG00000233901	LINC01503	0.528365	2.91007	7.12588	0.00759793	0.339601	Up
ENSG00000233927	RPS28	0.592909	8.91857	7.07333	0.00782397	0.339989	Up
ENSG00000234004	ENSG00000234004	0.534965	2.15795	5.39286	0.0202193	0.405759	Up
ENSG00000234184	LINC01781	0.596763	0.0904134	4.34799	0.0370527	0.473337	Up
ENSG00000234465	PINLYP	0.476146	-0.540855	5.96503	0.0145923	0.3648	Up
ENSG00000234500	ENSG00000234500	0.391169	-0.240178	6.85001	0.00886405	0.34863	Up
ENSG00000234618	RPSAP9	0.571951	1.60063	5.58843	0.0180795	0.387216	Up
ENSG00000234705	HMGA1P4	0.596374	-1.12201	5.67034	0.0172542	0.379993	Up
ENSG00000234745	HLA-B	0.390981	12.5224	8.06229	0.00451961	0.301168	Up
ENSG00000235001	EIF4A1P2	0.422365	0.661085	5.13912	0.0233925	0.432855	Up
ENSG00000235043	TECRP1	0.645396	3.03799	7.67079	0.00561218	0.312503	Up
ENSG00000235173	HGH1	0.428989	4.46248	7.18392	0.007356	0.339302	Up
ENSG00000235297	FAUP1	0.569008	2.22131	4.4715	0.0344646	0.461001	Up
ENSG00000235552	RPL6P27	0.409251	4.79852	4.13009	0.0421271	0.500511	Up
ENSG00000235698	PA2G4P2	0.322549	-0.32991	4.1183	0.0424217	0.50241	Up
ENSG00000235776	ENSG00000235776	0.472479	2.1029	6.20425	0.0127444	0.3648	Up
ENSG00000235863	B3GALT4	0.36141	4.75203	5.08085	0.0241915	0.440393	Up
ENSG00000236017	ASMTL-AS1	0.399102	2.16844	5.68074	0.0171521	0.379406	Up
ENSG00000236320	SLFN14	0.787349	2.11589	5.36246	0.0205747	0.408526	Up
ENSG00000236383	CCDC200	0.339332	1.80849	5.4531	0.0195336	0.399539	Up
ENSG00000236935	ENSG00000236935	0.668241	1.4703	9.44555	0.00211662	0.291695	Up
ENSG00000237118	CYP2F2P	0.560353	-1.0205	5.61062	0.017852	0.385525	Up
ENSG00000237176	ENSG00000237176	0.506929	-1.31224	4.01849	0.0450039	0.516885	Up
ENSG00000237424	FOXD2-AS1	0.292231	1.87546	5.26259	0.0217885	0.420547	Up
ENSG00000237493	ENSG00000237493	0.534342	-0.697072	7.89042	0.00496973	0.304543	Up
ENSG00000237550	ENSG00000237550	0.81911	6.02723	4.73359	0.0295791	0.442487	Up
ENSG00000237758	BANF1P3	0.552673	1.92062	9.52556	0.00202629	0.291695	Up
ENSG00000237886	NALT1	0.562021	1.63535	5.62335	0.0177228	0.384253	Up
ENSG00000238045	ENSG00000238045	0.296343	1.44112	5.5575	0.0184017	0.390751	Up
ENSG00000238164	TNFRSF14-AS1	0.389462	3.83349	9.38741	0.00218481	0.292833	Up
ENSG00000238198	LRIG2-DT	0.41908	-1.44969	5.03465	0.0248451	0.441127	Up
ENSG00000238260	ENSG00000238260	0.330328	2.74396	4.46571	0.0345817	0.461451	Up
ENSG00000239203	ENSG00000239203	0.497693	-1.53665	5.86176	0.0154733	0.366716	Up
ENSG00000239246	ENSG00000239246	0.687866	-0.525466	4.01644	0.0450588	0.51699	Up
ENSG00000239556	UPK3BL3P	0.420138	0.32431	7.47389	0.00626	0.324971	Up
ENSG00000239559	RPL37P2	0.659505	0.10807	6.68209	0.00973866	0.356724	Up
ENSG00000239569	KMT2E-AS1	0.391362	2.65413	4.43275	0.0352557	0.465038	Up
ENSG00000239697	TNFSF12	0.32761	5.09859	7.8862	0.00498135	0.304543	Up
ENSG00000239857	GET4	0.370854	0.215375	4.27504	0.0386762	0.483144	Up
ENSG00000240036	ENSG00000240036	0.515586	2.36374	5.4107	0.0200137	0.403738	Up
ENSG00000240231	RPS27P29	0.85536	-1.07624	5.44116	0.0196676	0.400785	Up
ENSG00000240247	DEFA1B	1.5817	1.41958	11.1986	0.000818605	0.234405	Up
ENSG00000240505	TNFRSF13B	0.668071	2.34704	5.29059	0.021441	0.41666	Up
ENSG00000240509	RPL34P18	1.00351	-0.923404	11.0852	0.000870202	0.235972	Up
ENSG00000241269	ENSG00000241269	0.450154	-0.459687	4.229	0.0397389	0.488829	Up
ENSG00000241429	EEF1A1P25	0.744826	-0.859265	6.26551	0.0123111	0.3648	Up
ENSG00000241431	RPL37P6	0.599873	0.428605	6.12595	0.0133211	0.3648	Up
ENSG00000241468	ATP5MF	0.560634	4.09988	7.39027	0.00655778	0.332118	Up
ENSG00000241553	ARPC4	0.524821	7.9891	6.40261	0.0113953	0.3648	Up
ENSG00000241657	TRBV11-2	0.462152	2.51464	4.69193	0.0303045	0.446514	Up
ENSG00000241666	ENSG00000241666	1.3614	1.96458	16.6763	4.43e-05	0.115832	Up
ENSG00000241837	ATP5PO	0.325281	3.60295	3.93288	0.0473508	0.529583	Up
ENSG00000242252	BGLAP	0.681915	-0.590151	5.69599	0.0170038	0.378897	Up
ENSG00000242299	ENSG00000242299	0.532153	5.02815	3.98983	0.0457757	0.520528	Up
ENSG00000242372	EIF6	0.520614	5.40964	9.34825	0.00223199	0.293467	Up
ENSG00000242485	MRPL20	0.357843	5.24329	6.57834	0.0103227	0.362412	Up
ENSG00000242612	DECR2	0.346885	2.18654	5.06143	0.024464	0.441127	Up
ENSG00000242802	AP5Z1	0.317273	6.75182	5.90215	0.0151224	0.364815	Up
ENSG00000243056	EIF4EBP3	0.429382	0.43792	4.69112	0.0303188	0.446514	Up
ENSG00000243279	PRAF2	0.328409	3.56133	4.07233	0.0435912	0.508325	Up
ENSG00000243449	C4orf48	0.928219	2.354	10.8254	0.00100117	0.241475	Up
ENSG00000243477	NAA80	0.40832	3.88699	6.4466	0.0111165	0.3648	Up
ENSG00000243680	RPL37P23	0.645467	-0.746942	5.90263	0.0151183	0.364815	Up
ENSG00000243696	ENSG00000243696	0.319431	1.97795	6.03166	0.0140515	0.3648	Up
ENSG00000243824	RPL12P6	0.5448	-1.39128	4.1124	0.0425699	0.502901	Up
ENSG00000244086	ENSG00000244086	0.769396	-0.0353482	9.34097	0.00224087	0.293467	Up
ENSG00000244134	RPS12P20	0.717729	-0.881957	5.77678	0.0162392	0.371847	Up
ENSG00000244165	P2RY11	0.26305	2.73434	4.25853	0.0390538	0.485615	Up
ENSG00000244187	TMEM141	0.47961	3.06295	4.82479	0.0280532	0.441127	Up
ENSG00000244219	TMEM225B	0.476441	-1.7565	4.44877	0.0349264	0.463486	Up
ENSG00000244245	ENSG00000244245	0.593841	-0.466183	5.0367	0.0248157	0.441127	Up
ENSG00000244398	ENSG00000244398	0.622132	4.4267	5.47715	0.0192667	0.396743	Up
ENSG00000244582	RPL21P120	0.844995	-1.47407	8.20332	0.00418138	0.296634	Up
ENSG00000245848	CEBPA	0.27367	4.44454	5.11559	0.0237118	0.434913	Up
ENSG00000246089	MCPH1-DT	0.336812	1.41254	6.28679	0.0121641	0.3648	Up
ENSG00000247134	ENSG00000247134	0.446727	-0.429397	4.97435	0.0257258	0.441127	Up
ENSG00000247596	TWF2	0.263647	6.76117	4.44994	0.0349025	0.463486	Up
ENSG00000248099	INSL3	0.526089	1.84061	7.36855	0.00663745	0.332677	Up
ENSG00000248275	TRIM52-AS1	0.448232	3.50375	5.15441	0.0231874	0.430603	Up
ENSG00000248367	ENSG00000248367	0.415949	1.77696	6.24582	0.0124487	0.3648	Up
ENSG00000248487	ABHD14A	0.45271	2.32645	6.28262	0.0121928	0.3648	Up
ENSG00000248592	STIMATE-MUSTN1	0.290494	1.24236	3.91868	0.0477523	0.531513	Up
ENSG00000248712	CCDC153	0.606447	2.23754	6.73052	0.0094777	0.353567	Up
ENSG00000250535	STK19B	0.978536	-2.00768	8.04627	0.00455973	0.301168	Up
ENSG00000250571	GLI4	0.313304	4.50791	3.97014	0.0463139	0.523588	Up
ENSG00000251495	PPIAP11	0.643612	-0.0142778	6.35765	0.0116876	0.3648	Up
ENSG00000253291	TRBV7-7	0.499728	-0.586957	5.87017	0.0153995	0.365797	Up
ENSG00000253683	ENSG00000253683	0.42028	1.13597	3.84839	0.0497937	0.543433	Up
ENSG00000253755	IGHGP	1.52488	2.5033	7.20324	0.00727719	0.339302	Up
ENSG00000254275	LINC00824	0.742359	-0.346183	7.68883	0.00555637	0.312503	Up
ENSG00000254528	ENSG00000254528	0.623059	-0.997904	7.62824	0.00574613	0.31536	Up
ENSG00000254531	ENSG00000254531	0.717588	1.85994	7.28453	0.00695508	0.336908	Up
ENSG00000254802	ENSG00000254802	0.580122	-0.32958	6.53023	0.0106056	0.3648	Up
ENSG00000254827	SLC22A18AS	0.54011	-0.0605765	6.03038	0.0140617	0.3648	Up
ENSG00000254858	MPV17L2	0.283212	3.02404	4.16106	0.0413636	0.496977	Up
ENSG00000254887	POU2F2-AS1	0.274157	1.42201	4.71561	0.02989	0.444171	Up
ENSG00000255198	SNHG9	0.730392	2.1471	9.94092	0.00161645	0.274578	Up
ENSG00000255328	ENSG00000255328	0.750413	1.66991	4.18931	0.0406797	0.494579	Up
ENSG00000255587	RAB44	0.436405	4.56876	8.88253	0.00287913	0.296541	Up
ENSG00000255967	HADHAP2	0.447879	-1.65255	4.99177	0.0254681	0.441127	Up
ENSG00000256073	URB1-AS1	0.409197	0.207055	5.59289	0.0180335	0.387168	Up
ENSG00000256338	RPL41P2	0.809977	0.928708	5.68134	0.0171463	0.379406	Up
ENSG00000256393	RPL41P5	0.764931	0.0691354	5.55476	0.0184305	0.390751	Up
ENSG00000257595	LINC02356	0.630697	-1.61649	3.85138	0.0497051	0.542749	Up
ENSG00000257702	LBX2-AS1	0.457284	1.42797	6.82702	0.0089789	0.34863	Up
ENSG00000257704	INAFM1	0.680754	3.71888	8.23118	0.00411767	0.296634	Up
ENSG00000257790	EIF4A1P4	0.461496	-1.51115	3.97342	0.0462237	0.523036	Up
ENSG00000258701	LINC00638	0.573946	0.577962	9.27652	0.0023211	0.296541	Up
ENSG00000258741	H2AZ2P1	0.404641	0.530185	10.213	0.00139456	0.260859	Up
ENSG00000259436	ENSG00000259436	0.34277	2.78984	4.21164	0.0401476	0.491307	Up
ENSG00000259704	ENSG00000259704	0.487718	0.302839	4.34788	0.037055	0.473337	Up
ENSG00000259802	ENSG00000259802	0.475754	-0.632279	4.397	0.0360022	0.467761	Up
ENSG00000260081	ENSG00000260081	0.700217	-0.747365	7.6245	0.00575805	0.31536	Up
ENSG00000260193	LINC02846	0.383481	0.0666637	4.75915	0.0291429	0.441127	Up
ENSG00000260260	SNHG19	0.661509	0.959358	8.60033	0.00336102	0.296634	Up
ENSG00000260428	SCX	0.536674	-0.582178	6.22556	0.0125919	0.3648	Up
ENSG00000260778	MIR3677HG	0.4567	0.886143	4.56262	0.032677	0.456731	Up
ENSG00000260911	ENSG00000260911	0.358275	1.59362	4.25419	0.0391537	0.486203	Up
ENSG00000261221	ZNF865	0.328584	5.21098	5.00795	0.0252312	0.441127	Up
ENSG00000261236	BOP1	0.418556	4.95166	7.14183	0.00753063	0.339302	Up
ENSG00000261386	ENSG00000261386	0.477821	-0.2234	4.41676	0.0355876	0.466005	Up
ENSG00000261659	ENSG00000261659	0.300279	-0.5044	4.16633	0.041235	0.496514	Up
ENSG00000261864	ENSG00000261864	0.633669	-1.62625	7.05184	0.00791839	0.339989	Up
ENSG00000262246	CORO7	0.516227	5.99505	7.01404	0.00808731	0.341112	Up
ENSG00000262484	CCER2	0.962194	-0.75654	14.9198	0.000112178	0.173858	Up
ENSG00000262712	ENSG00000262712	0.417327	-0.716417	5.13725	0.0234177	0.432938	Up
ENSG00000262814	MRPL12	0.601715	1.54452	5.78661	0.0161487	0.371812	Up
ENSG00000262823	ENSG00000262823	0.300128	1.85711	6.56387	0.010407	0.363578	Up
ENSG00000262877	ENSG00000262877	0.45745	2.11566	4.43427	0.0352242	0.46474	Up
ENSG00000262903	ENSG00000262903	0.480198	-0.733858	7.80158	0.00522006	0.307936	Up
ENSG00000262999	ENSG00000262999	1.04796	-1.17206	9.54606	0.00200379	0.291695	Up
ENSG00000264070	DND1P1	0.754707	-0.537104	4.13368	0.0420379	0.499847	Up
ENSG00000264278	ZNF236-DT	0.297441	0.704935	4.34334	0.0371539	0.474032	Up
ENSG00000264281	ENSG00000264281	0.746579	1.76396	5.47392	0.0193023	0.397258	Up
ENSG00000264745	TTC39C-AS1	0.642954	0.458714	5.87904	0.0153222	0.365439	Up
ENSG00000265206	ENSG00000265206	0.654427	6.96589	10.1059	0.00147798	0.267773	Up
ENSG00000265646	TUFMP1	0.575703	-2.09166	4.5389	0.0331328	0.456731	Up
ENSG00000265907	ENSG00000265907	0.922511	-0.163194	4.74886	0.0293177	0.441955	Up
ENSG00000266378	ENSG00000266378	1.00249	0.394463	6.15281	0.0131204	0.3648	Up
ENSG00000266643	MIR3677	0.556842	-1.55103	5.3925	0.0202234	0.405759	Up
ENSG00000266962	HSD17B1-AS1	0.365175	2.11232	7.78087	0.00528022	0.308021	Up
ENSG00000267117	ENSG00000267117	0.6417	-1.54674	4.99545	0.025414	0.441127	Up
ENSG00000267174	ENSG00000267174	0.648266	4.15526	4.56997	0.0325372	0.456731	Up
ENSG00000267288	ENSG00000267288	0.564379	0.22503	4.03115	0.0446674	0.515001	Up
ENSG00000267317	ENSG00000267317	0.383035	2.67706	4.58949	0.0321686	0.455989	Up
ENSG00000267342	ENSG00000267342	0.522164	0.491576	7.12128	0.00761743	0.339601	Up
ENSG00000267390	KDSR-DT	0.562224	-0.0110697	8.30942	0.00394399	0.296634	Up
ENSG00000267475	NUDT19-DT	0.460304	0.0932142	7.22602	0.00718543	0.339302	Up
ENSG00000267834	ENSG00000267834	0.71629	-2.02374	7.80752	0.00520293	0.307936	Up
ENSG00000267838	ENSG00000267838	0.522858	1.06534	4.03333	0.0446097	0.514715	Up
ENSG00000267852	ARHGEF18-AS1	0.986251	0.068926	9.69562	0.00184707	0.287419	Up
ENSG00000268061	NAPA-AS1	0.510967	0.214393	9.46085	0.00209904	0.291695	Up
ENSG00000268119	ENSG00000268119	2.31626	1.32762	17.4978	2.88e-05	0.109982	Up
ENSG00000268412	TRMT112P6	0.619499	0.086874	7.90173	0.00493876	0.304234	Up
ENSG00000268836	ENSG00000268836	0.782011	-0.493511	6.71004	0.00958717	0.354306	Up
ENSG00000268903	ENSG00000268903	0.523498	5.93937	4.29722	0.0381746	0.479581	Up
ENSG00000268938	ENSG00000268938	0.624386	0.24791	5.76384	0.0163593	0.373164	Up
ENSG00000269053	ENSG00000269053	0.414833	-0.322363	4.11688	0.0424574	0.50241	Up
ENSG00000269161	ENSG00000269161	0.419982	-0.968761	5.12608	0.0235689	0.434028	Up
ENSG00000269191	ENSG00000269191	0.525229	0.714857	7.36813	0.00663901	0.332677	Up
ENSG00000269246	ENSG00000269246	0.638591	-0.792967	6.08471	0.0136357	0.3648	Up
ENSG00000269318	ENSG00000269318	0.47625	-0.793858	4.41747	0.0355727	0.466005	Up
ENSG00000269720	CCDC194	0.58974	0.709954	5.84545	0.0156174	0.367768	Up
ENSG00000270441	LAMB2P1	0.55429	1.72376	9.83354	0.00171358	0.278443	Up
ENSG00000270972	ENSG00000270972	0.927423	2.39978	6.85567	0.00883606	0.34863	Up
ENSG00000271228	ENSG00000271228	0.61714	-1.8234	5.35081	0.0207126	0.409356	Up
ENSG00000271736	LINC02772	1.19929	1.36878	6.15327	0.0131169	0.3648	Up
ENSG00000272078	ENSG00000272078	0.311526	0.0959083	4.6415	0.0312076	0.450377	Up
ENSG00000272156	ENSG00000272156	0.367836	-0.326999	5.62231	0.0177333	0.384253	Up
ENSG00000272288	ILRUN-AS1	0.469246	0.699633	5.26153	0.0218019	0.420676	Up
ENSG00000272449	ENSG00000272449	0.524023	3.28757	5.58978	0.0180656	0.387216	Up
ENSG00000272677	HNRNPD-DT	0.476763	-0.804423	5.61835	0.0177733	0.384864	Up
ENSG00000272696	ENSG00000272696	0.523585	-0.962427	6.04511	0.0139449	0.3648	Up
ENSG00000272733	ENSG00000272733	0.564262	-0.593087	4.44108	0.035084	0.464136	Up
ENSG00000272843	ENSG00000272843	0.464816	-1.77421	4.60363	0.0319044	0.454711	Up
ENSG00000272906	ENSG00000272906	0.293271	0.0254399	4.34028	0.0372208	0.474414	Up
ENSG00000272988	ENSG00000272988	0.631532	-1.1356	5.33837	0.020861	0.41094	Up
ENSG00000273139	ENSG00000273139	0.53688	-1.50266	4.59198	0.032122	0.455838	Up
ENSG00000273240	ENSG00000273240	0.534481	-1.6481	5.2983	0.0213462	0.41585	Up
ENSG00000273424	ENSG00000273424	0.537083	-0.220418	6.37492	0.0115744	0.3648	Up
ENSG00000273619	ENSG00000273619	0.449816	-0.352405	4.41562	0.0356113	0.466217	Up
ENSG00000273669	ENSG00000273669	0.332092	2.57246	4.08602	0.0432394	0.506641	Up
ENSG00000273893	ENSG00000273893	0.467319	0.519784	6.29874	0.0120824	0.3648	Up
ENSG00000273899	NOL12	0.294009	3.90578	4.5802	0.0323435	0.45627	Up
ENSG00000274180	NATD1	0.464623	7.18627	4.68812	0.0303719	0.446514	Up
ENSG00000274191	ENSG00000274191	0.672388	-1.81166	7.87126	0.00502266	0.304543	Up
ENSG00000274225	ENSG00000274225	0.7617	-1.79368	8.57742	0.00340357	0.296634	Up
ENSG00000274370	ENSG00000274370	0.615261	0.61157	6.32392	0.011912	0.3648	Up
ENSG00000274376	ADAMTS7P1	0.517911	1.74567	5.82283	0.0158195	0.369063	Up
ENSG00000274515	ENSG00000274515	0.568177	-0.361337	9.22153	0.00239186	0.296541	Up
ENSG00000274736	CCL23	1.14603	0.245012	9.33721	0.00224547	0.293467	Up
ENSG00000274751	ENSG00000274751	0.517083	-1.09369	5.55436	0.0184347	0.390751	Up
ENSG00000274963	RN7SL600P	0.807162	-0.0153002	5.72767	0.0166996	0.376718	Up
ENSG00000275074	NUDT18	0.375458	3.72555	5.57806	0.0181868	0.388188	Up
ENSG00000275106	ENSG00000275106	0.659077	-0.69586	4.74435	0.0293947	0.441955	Up
ENSG00000275120	ENSG00000275120	0.670452	-1.8128	6.39304	0.0114569	0.3648	Up
ENSG00000275183	LENG9	0.409656	1.92852	8.78805	0.0030321	0.296634	Up
ENSG00000275484	ENSG00000275484	0.607665	-1.1496	4.81713	0.0281783	0.441127	Up
ENSG00000275494	ENSG00000275494	0.504054	-1.29276	3.87231	0.049089	0.538367	Up
ENSG00000275743	TRBV14	0.765327	1.47667	8.68965	0.00320022	0.296634	Up
ENSG00000275793	RIMBP3	0.406999	0.696531	6.76216	0.00931109	0.351983	Up
ENSG00000275895	ENSG00000275895	1.08449	2.60964	7.43953	0.00638067	0.328425	Up
ENSG00000276045	ORAI1	0.342895	6.43345	5.23508	0.0221357	0.422586	Up
ENSG00000276136	ENSG00000276136	0.360045	3.27699	4.23277	0.0396507	0.488367	Up
ENSG00000276231	PIK3R6	0.604285	4.76242	11.8905	0.000564221	0.213146	Up
ENSG00000276405	TRBV13	0.482137	1.02274	5.41368	0.0199796	0.403517	Up
ENSG00000276728	ENSG00000276728	0.370365	0.542349	4.46844	0.0345265	0.461451	Up
ENSG00000277150	F8A3	0.367685	3.22562	4.23848	0.0395175	0.487778	Up
ENSG00000277232	GTSE1-DT	0.406819	-0.311202	4.41786	0.0355647	0.466005	Up
ENSG00000277491	ENSG00000277491	0.762291	-1.68667	6.43739	0.0111743	0.3648	Up
ENSG00000277734	TRAC	0.292276	8.72017	3.97143	0.0462784	0.523322	Up
ENSG00000277972	CISD3	0.445149	4.03527	4.49744	0.0339456	0.458871	Up
ENSG00000278023	RDM1	0.46631	-1.3202	4.19932	0.0404402	0.493386	Up
ENSG00000278107	ENSG00000278107	0.544516	-0.466312	7.71514	0.00547595	0.312503	Up
ENSG00000278267	MIR6859-1	0.493734	0.263374	5.63499	0.0176054	0.382814	Up
ENSG00000278607	ENSG00000278607	0.504817	-0.569199	9.05941	0.00261346	0.296541	Up
ENSG00000278619	MRM1	0.306616	3.1425	4.67413	0.0306202	0.447175	Up
ENSG00000278668	ENSG00000278668	0.525206	-1.01782	9.52662	0.00202512	0.291695	Up
ENSG00000278743	ENSG00000278743	0.526164	-0.211699	4.63864	0.0312597	0.450377	Up
ENSG00000278966	ENSG00000278966	0.537463	-0.476361	4.23258	0.039655	0.488367	Up
ENSG00000278970	HEIH	0.368864	3.64217	4.78736	0.0286693	0.441127	Up
ENSG00000279283	ENSG00000279283	0.626445	0.419282	4.19414	0.0405638	0.493838	Up
ENSG00000279332	ENSG00000279332	0.497509	-0.222074	4.29244	0.0382821	0.480327	Up
ENSG00000279406	ENSG00000279406	0.400378	-0.401733	6.07846	0.013684	0.3648	Up
ENSG00000279413	ENSG00000279413	0.473332	-0.151492	6.33837	0.0118153	0.3648	Up
ENSG00000279457	WASH9P	0.655574	4.84839	9.72793	0.00181489	0.286666	Up
ENSG00000279495	ENSG00000279495	0.364263	-0.118576	4.41883	0.0355445	0.466005	Up
ENSG00000279605	ENSG00000279605	0.491578	0.0242127	5.97419	0.0145168	0.3648	Up
ENSG00000279917	ENSG00000279917	0.908819	-0.955451	7.67322	0.00560465	0.312503	Up
ENSG00000279928	DDX11L17	1.02264	0.293099	6.73814	0.00943732	0.353393	Up
ENSG00000280007	ENSG00000280007	0.313223	0.373149	4.7805	0.0287837	0.441127	Up
ENSG00000280033	ENSG00000280033	0.44549	0.289289	5.95603	0.014667	0.3648	Up
ENSG00000280071	ENSG00000280071	0.371437	4.5524	4.50414	0.033813	0.458864	Up
ENSG00000280206	ENSG00000280206	0.347016	3.04577	7.29634	0.00690952	0.336908	Up
ENSG00000280211	ENSG00000280211	0.37961	-0.0427762	4.66136	0.0308487	0.448637	Up
ENSG00000281332	LINC00997	0.779282	-0.63924	4.84572	0.0277149	0.441127	Up
ENSG00000281538	ENSG00000281538	0.505571	-0.542817	6.46896	0.0109775	0.3648	Up
ENSG00000282608	ADORA3	0.933765	2.72093	14.5826	0.000134148	0.173858	Up
ENSG00000282933	RHOXF1P3	0.716273	-1.38595	5.37024	0.0204832	0.408378	Up
ENSG00000282939	TRBV7-2	0.59576	3.5321	8.40988	0.00373188	0.296634	Up
ENSG00000283063	TRBV6-2	0.736496	2.60957	8.05991	0.00452554	0.301168	Up
ENSG00000284138	ATP6V0CP4	4.48964	2.3465	28.4747	9.49e-08	0.00297652	Up
ENSG00000284735	ENSG00000284735	0.635628	-1.21081	4.76257	0.0290851	0.441127	Up
ENSG00000284753	EEF1AKMT4	0.56623	0.374092	5.1849	0.022784	0.427525	Up
ENSG00000285130	ENSG00000285130	0.532041	-0.233931	5.67193	0.0172385	0.37984	Up
ENSG00000285331	ENSG00000285331	0.433283	-0.435128	7.4314	0.00640956	0.328922	Up
ENSG00000285884	ENSG00000285884	0.50969	-0.303299	5.20178	0.0225638	0.425712	Up
ENSG00000285933	ENSG00000285933	0.760972	-0.0808635	5.97098	0.0145432	0.3648	Up
ENSG00000286292	ENSG00000286292	0.30592	0.397451	4.23325	0.0396396	0.488367	Up
ENSG00000286369	ENSG00000286369	0.463743	-0.794336	3.9899	0.0457737	0.520528	Up
ENSG00000286796	ENSG00000286796	0.479203	1.4427	9.96336	0.00159686	0.274354	Up
ENSG00000286989	ENSG00000286989	0.329511	1.11291	3.87784	0.0489275	0.538367	Up
ENSG00000287115	ENSG00000287115	0.695298	-0.777959	5.87393	0.0153667	0.365439	Up
ENSG00000287170	ENSG00000287170	0.341475	-0.293463	4.33574	0.0373201	0.474577	Up
ENSG00000287218	ENSG00000287218	1.03371	-0.195068	8.28665	0.00399375	0.296634	Up
ENSG00000287625	ENSG00000287625	0.27571	1.88285	6.47941	0.0109131	0.3648	Up
ENSG00000287978	ENSG00000287978	0.694239	2.70017	5.7878	0.0161378	0.371812	Up
ENSG00000288033	ENSG00000288033	0.643466	-1.50817	9.42972	0.00213497	0.292323	Up
ENSG00000288302	ENSG00000288302	0.459599	-0.369595	4.5711	0.0325156	0.456731	Up
ENSG00000288675	PANO1	0.660125	-1.06478	6.56089	0.0104245	0.363798	Up
ENSG00000288709	F8A2	0.414917	0.87518	4.15096	0.0416109	0.497785	Up
ENSG00000288722	F8A1	0.692278	3.79815	7.77443	0.00529908	0.308497	Up
ENSG00000288757	ENSG00000288757	0.583699	1.25329	5.9458	0.0147524	0.3648	Up
ENSG00000288825	H2AC18	0.684851	3.84957	6.95811	0.00834402	0.343825	Up
ENSG00000288858	ENSG00000288858	0.541003	-0.975234	6.08489	0.0136343	0.3648	Up
ENSG00000288880	ENSG00000288880	0.360345	0.0632831	5.98407	0.0144357	0.3648	Up
ENSG00000288900	ENSG00000288900	0.453039	-0.722119	5.00538	0.0252686	0.441127	Up
ENSG00000288934	ENSG00000288934	0.408545	-1.23266	4.33555	0.0373244	0.474577	Up
ENSG00000288953	ENSG00000288953	0.462975	2.79538	4.35886	0.036817	0.473126	Up
ENSG00000288973	ENSG00000288973	0.373272	1.42718	9.01224	0.00268177	0.296541	Up
ENSG00000288983	ENSG00000288983	0.551044	-1.32639	5.90111	0.0151313	0.364815	Up
ENSG00000289007	ENSG00000289007	0.335841	1.67242	5.7886	0.0161305	0.371812	Up
ENSG00000289042	ENSG00000289042	0.353566	0.935539	7.85428	0.00507006	0.304543	Up
ENSG00000289043	ENSG00000289043	0.394374	0.622587	4.27265	0.0387304	0.48334	Up
ENSG00000289161	ENSG00000289161	0.372731	2.36679	5.53719	0.0186165	0.392277	Up
ENSG00000289164	ENSG00000289164	1.07714	-1.02188	6.41608	0.0113092	0.3648	Up
ENSG00000289278	ENSG00000289278	0.584849	0.498272	5.12485	0.0235856	0.434028	Up
ENSG00000289365	ENSG00000289365	0.443033	-1.26337	4.34825	0.0370471	0.473337	Up
ENSG00000289393	ENSG00000289393	0.453757	-0.0685483	9.14543	0.00249341	0.296541	Up
ENSG00000289421	ENSG00000289421	0.557094	-0.788259	5.95691	0.0146597	0.3648	Up
ENSG00000289515	ENSG00000289515	0.717467	-1.03921	8.27785	0.00401317	0.296634	Up
ENSG00000289561	ENSG00000289561	1.00387	2.96889	9.81762	0.00172847	0.279363	Up
ENSG00000290017	ENSG00000290017	0.888642	0.732404	8.04135	0.00457214	0.301168	Up
ENSG00000290074	ENSG00000290074	0.46198	-0.599658	4.67952	0.0305243	0.446716	Up
ENSG00000290121	ENSG00000290121	0.452861	0.470171	3.98087	0.0460198	0.522076	Up
ENSG00000290541	ENSG00000290541	1.40151	2.09452	10.1438	0.00144784	0.266756	Up
ENSG00000290698	ENSG00000290698	0.911794	1.73276	8.4177	0.00371586	0.296634	Up
ENSG00000290746	ENSG00000290746	0.317225	1.25541	4.90463	0.0267848	0.441127	Up
ENSG00000290823	ENSG00000290823	0.688212	2.02533	14.3696	0.000150207	0.173858	Up
ENSG00000290851	ENSG00000290851	0.819588	-1.2627	7.12981	0.00758128	0.339302	Up
ENSG00000290948	ENSG00000290948	0.498398	0.84256	4.90978	0.026705	0.441127	Up
ENSG00000290958	ENSG00000290958	0.369461	1.14448	4.08687	0.0432175	0.506479	Up
ENSG00000291200	ENSG00000291200	0.716353	-0.629951	4.65472	0.0309683	0.449298	Up
ENSG00000291208	ENSG00000291208	0.347212	1.51432	4.69031	0.0303331	0.446514	Up
ENSG00000291230	ENSG00000291230	0.626218	-0.227114	7.00005	0.00815072	0.341712	Up
ENSG00000291317	ENSG00000291317	0.454345	1.28902	5.1717	0.0229577	0.428925	Up
ENSG00000002587	HS3ST1	-0.583164	0.65898	7.2033	0.00727695	0.339302	Down
ENSG00000004468	CD38	-0.437955	4.43517	7.08912	0.00775534	0.339944	Down
ENSG00000005249	PRKAR2B	-0.431728	4.73999	5.19214	0.0226892	0.426435	Down
ENSG00000005471	ABCB4	-0.420931	1.73002	5.4086	0.0200378	0.403782	Down
ENSG00000006740	ARHGAP44	-0.437599	-0.487223	4.35034	0.0370015	0.473254	Down
ENSG00000007314	SCN4A	-0.616219	-0.434328	9.00015	0.00269957	0.296541	Down
ENSG00000010319	SEMA3G	-0.429791	-0.113759	4.06246	0.0438467	0.509378	Down
ENSG00000035499	DEPDC1B	-0.658477	-1.06277	7.05003	0.00792638	0.339989	Down
ENSG00000042980	ADAM28	-0.385209	4.83237	5.94751	0.0147381	0.3648	Down
ENSG00000047648	ARHGAP6	-0.385067	1.06197	4.68021	0.030512	0.446716	Down
ENSG00000050165	DKK3	-0.790715	0.586559	5.13292	0.0234762	0.433253	Down
ENSG00000051341	POLQ	-0.712673	-0.422916	9.02406	0.00266449	0.296541	Down
ENSG00000065328	MCM10	-0.925865	-1.16426	11.2285	0.000805499	0.234405	Down
ENSG00000065534	MYLK	-0.383137	3.06722	5.88864	0.0152389	0.365439	Down
ENSG00000066279	ASPM	-0.638346	-0.239773	4.58079	0.0323322	0.45627	Down
ENSG00000074527	NTN4	-0.812586	-0.256648	7.08139	0.00778885	0.339989	Down
ENSG00000075218	GTSE1	-0.391346	0.0628848	4.96615	0.0258481	0.441127	Down
ENSG00000076716	GPC4	-1.58579	-0.436393	15.8332	6.92e-05	0.138974	Down
ENSG00000076770	MBNL3	-0.412088	6.44164	4.07161	0.0436096	0.508325	Down
ENSG00000079931	MOXD1	-0.564653	-0.186264	5.13597	0.023435	0.43313	Down
ENSG00000081189	MEF2C	-0.323283	5.59899	5.27286	0.0216604	0.419365	Down
ENSG00000082196	C1QTNF3	-0.300166	1.23826	5.2825	0.0215408	0.418211	Down
ENSG00000082293	COL19A1	-0.686368	1.47671	4.41737	0.0355748	0.466005	Down
ENSG00000083097	DOP1A	-0.325796	4.34339	4.18367	0.0408153	0.495108	Down
ENSG00000086570	FAT2	-0.4612	-0.142816	4.06514	0.0437771	0.509071	Down
ENSG00000087303	NID2	-0.351434	-0.679264	4.10055	0.0428692	0.504755	Down
ENSG00000090061	CCNK	-0.28513	3.72869	4.17877	0.0409335	0.495108	Down
ENSG00000090339	ICAM1	-0.33837	5.09731	6.16527	0.0130282	0.3648	Down
ENSG00000090889	KIF4A	-0.500894	-1.07057	4.01588	0.0450736	0.517023	Down
ENSG00000091972	CD200	-0.560165	2.3481	8.28758	0.0039917	0.296634	Down
ENSG00000094804	CDC6	-0.366341	0.196133	4.16889	0.0411729	0.496338	Down
ENSG00000096093	EFHC1	-0.29157	3.26235	4.57728	0.0323987	0.456475	Down
ENSG00000100154	TTC28	-0.33536	1.40175	3.90217	0.0482239	0.534486	Down
ENSG00000100320	RBFOX2	-0.473739	-0.201354	4.41834	0.0355547	0.466005	Down
ENSG00000100473	COCH	-0.570335	0.296065	4.09925	0.0429022	0.504936	Down
ENSG00000101162	TUBB1	-0.505697	6.14979	5.74725	0.0165145	0.375227	Down
ENSG00000102024	PLS3	-0.543591	-1.4629	5.44578	0.0196157	0.400696	Down
ENSG00000102384	CENPI	-0.484508	-0.804135	7.78651	0.00526378	0.307936	Down
ENSG00000102710	SUPT20H	-0.274031	5.30376	4.52654	0.033373	0.456998	Down
ENSG00000103528	SYT17	-0.507271	0.795078	6.05942	0.0138323	0.3648	Down
ENSG00000105974	CAV1	-0.731507	-0.925604	6.8597	0.00881613	0.34863	Down
ENSG00000105982	RNF32	-0.296102	0.315122	4.07277	0.0435797	0.508325	Down
ENSG00000106537	TSPAN13	-0.456724	3.22201	5.30804	0.0212272	0.415096	Down
ENSG00000106692	FKTN	-0.347275	3.58189	4.3196	0.0376758	0.47711	Down
ENSG00000108576	SLC6A4	-0.536053	-0.350264	7.15847	0.00746106	0.339302	Down
ENSG00000109805	NCAPG	-0.569888	-0.216818	5.25313	0.0219073	0.420901	Down
ENSG00000110042	DTX4	-0.283331	4.59631	4.39724	0.0359971	0.467761	Down
ENSG00000110203	FOLR3	-0.94754	5.99935	4.27049	0.0387798	0.483542	Down
ENSG00000110315	RNF141	-0.302823	6.29597	3.96956	0.0463298	0.523674	Down
ENSG00000110987	BCL7A	-0.415548	3.32014	7.58716	0.00587856	0.31725	Down
ENSG00000112137	PHACTR1	-0.296245	3.87952	7.09504	0.00772974	0.339944	Down
ENSG00000112984	KIF20A	-0.6257	-0.886597	6.76477	0.00929751	0.351983	Down
ENSG00000113083	LOX	-0.598809	-1.55675	6.91461	0.0085494	0.346116	Down
ENSG00000115423	DNAH6	-0.520178	0.492591	3.89363	0.0484697	0.535979	Down
ENSG00000115594	IL1R1	-0.404645	4.46061	4.98747	0.0255315	0.441127	Down
ENSG00000116874	WARS2	-0.270279	2.40636	9.50466	0.00204951	0.291695	Down
ENSG00000117650	NEK2	-1.56335	-1.08341	19.7122	9e-06	0.0940914	Down
ENSG00000117724	CENPF	-0.362959	1.42943	4.64764	0.0310963	0.44965	Down
ENSG00000118402	ELOVL4	-0.506027	0.801903	4.5426	0.0330614	0.456731	Down
ENSG00000120539	MASTL	-0.444618	2.69952	4.93916	0.0262547	0.441127	Down
ENSG00000123473	STIL	-0.70835	0.622287	14.0062	0.000182209	0.173858	Down
ENSG00000123485	HJURP	-0.646786	-0.28095	7.10266	0.00769696	0.339944	Down
ENSG00000124721	DNAH8	-0.827149	-1.10671	9.46051	0.00209943	0.291695	Down
ENSG00000125827	TMX4	-0.283152	7.03969	4.18945	0.0406764	0.494579	Down
ENSG00000126787	DLGAP5	-0.615634	-0.474077	5.43071	0.0197856	0.400943	Down
ENSG00000126861	OMG	-0.395205	1.56749	4.54143	0.033084	0.456731	Down
ENSG00000127990	SGCE	-0.553616	0.150465	6.84654	0.00888132	0.34863	Down
ENSG00000128578	STRIP2	-0.433416	-0.69777	5.95567	0.0146701	0.3648	Down
ENSG00000129173	E2F8	-0.687083	-1.3859	7.13955	0.0075402	0.339302	Down
ENSG00000129595	EPB41L4A	-0.786637	-0.750729	9.32805	0.00225672	0.2941	Down
ENSG00000131409	LRRC4B	-1.44886	-1.26349	11.7219	0.000617697	0.21856	Down
ENSG00000131747	TOP2A	-0.69876	1.52746	10.2617	0.00135818	0.260859	Down
ENSG00000132549	VPS13B	-0.319787	5.90466	4.0143	0.0451161	0.517321	Down
ENSG00000133424	LARGE1	-0.649421	2.06397	8.94374	0.00278422	0.296541	Down
ENSG00000133794	ARNTL	-0.297412	5.88161	5.23347	0.0221563	0.422831	Down
ENSG00000134548	SPX	-0.863843	0.192413	9.02472	0.00266352	0.296541	Down
ENSG00000134909	ARHGAP32	-0.344486	2.55336	4.42137	0.0354915	0.466005	Down
ENSG00000135919	SERPINE2	-0.742348	1.37	9.67876	0.00186411	0.287927	Down
ENSG00000136010	ALDH1L2	-0.588598	-1.29802	8.52208	0.00350863	0.296634	Down
ENSG00000136237	RAPGEF5	-0.578197	-0.899954	3.97506	0.0461788	0.522815	Down
ENSG00000136492	BRIP1	-0.42369	0.25068	4.72808	0.0296741	0.442535	Down
ENSG00000136541	ERMN	-0.293472	3.39355	5.49046	0.0191205	0.395494	Down
ENSG00000136828	RALGPS1	-0.265717	3.70496	4.72707	0.0296914	0.442583	Down
ENSG00000137135	ARHGEF39	-0.275158	1.46735	4.7131	0.0299337	0.444399	Down
ENSG00000137265	IRF4	-0.301351	4.81461	5.65358	0.0174197	0.381404	Down
ENSG00000137502	RAB30	-0.353958	3.89344	3.9532	0.0467823	0.526916	Down
ENSG00000137507	LRRC32	-0.453459	-0.668557	4.86134	0.0274649	0.441127	Down
ENSG00000138160	KIF11	-0.377945	1.46667	5.99489	0.0143474	0.3648	Down
ENSG00000138336	TET1	-0.465961	-0.0273425	5.52001	0.0188002	0.393007	Down
ENSG00000138722	MMRN1	-0.4643	1.36148	4.14949	0.0416472	0.497785	Down
ENSG00000138735	PDE5A	-0.388336	2.79565	6.93694	0.00844335	0.345302	Down
ENSG00000139998	RAB15	-0.282366	3.29347	4.58211	0.0323074	0.456266	Down
ENSG00000140575	IQGAP1	-0.325276	9.23265	4.27804	0.0386078	0.482632	Down
ENSG00000142621	FHAD1	-0.706796	-0.641132	10.0493	0.00152408	0.269226	Down
ENSG00000142945	KIF2C	-0.370904	0.528987	5.74329	0.0165518	0.375348	Down
ENSG00000143476	DTL	-0.633518	-0.165128	7.31788	0.00682717	0.33579	Down
ENSG00000144218	AFF3	-0.520496	4.17897	10.6998	0.00107146	0.248857	Down
ENSG00000144868	TMEM108	-0.540066	-1.45106	4.40764	0.0357784	0.46704	Down
ENSG00000145284	SCD5	-0.613333	0.648352	4.9501	0.0260892	0.441127	Down
ENSG00000145386	CCNA2	-0.388651	0.977327	4.65621	0.0309414	0.449298	Down
ENSG00000145632	PLK2	-0.336417	0.165649	4.68593	0.0304105	0.446514	Down
ENSG00000146021	KLHL3	-0.333972	3.68563	4.31069	0.0378736	0.477974	Down
ENSG00000147535	PLPP5	-0.339236	5.05449	6.41515	0.0113151	0.3648	Down
ENSG00000148429	USP6NL	-0.365224	3.14641	4.18295	0.0408325	0.495108	Down
ENSG00000148773	MKI67	-0.636932	2.67154	10.5049	0.0011906	0.252365	Down
ENSG00000149488	TMC2	-0.518517	-0.134911	6.51692	0.0106853	0.3648	Down
ENSG00000152894	PTPRK	-0.520768	1.80571	4.76022	0.0291249	0.441127	Down
ENSG00000153162	BMP6	-0.457364	2.51377	6.9279	0.00848615	0.345302	Down
ENSG00000153253	SCN3A	-0.766343	0.869417	6.18375	0.0128929	0.3648	Down
ENSG00000155657	TTN	-0.500874	5.02196	6.14621	0.0131694	0.3648	Down
ENSG00000155980	KIF5A	-0.457844	0.157536	5.8739	0.015367	0.365439	Down
ENSG00000157470	FAM81A	-0.529425	-0.662689	6.50145	0.0107786	0.3648	Down
ENSG00000157654	PALM2AKAP2	-0.398379	4.55057	5.92971	0.0148877	0.3648	Down
ENSG00000158023	CFAP251	-0.334502	-0.134431	4.4392	0.0351228	0.464163	Down
ENSG00000159860	TCAF2P1	-0.662289	-0.816934	7.59376	0.00585706	0.317015	Down
ENSG00000163006	CCDC138	-0.370009	0.910423	7.69568	0.00553533	0.312503	Down
ENSG00000163449	TMEM169	-0.450333	1.71607	22.5218	2.08e-06	0.0325728	Down
ENSG00000163492	CCDC141	-0.467589	0.389572	4.82347	0.0280748	0.441127	Down
ENSG00000163534	FCRL1	-0.541227	5.0456	3.89743	0.0483601	0.535239	Down
ENSG00000163697	APBB2	-0.45337	-0.0357395	4.33259	0.0373892	0.475068	Down
ENSG00000163735	CXCL5	-0.967171	1.92131	8.96173	0.00275693	0.296541	Down
ENSG00000164056	SPRY1	-0.633202	-0.00686466	8.63599	0.00329585	0.296634	Down
ENSG00000164061	BSN	-0.406566	0.0771109	8.26456	0.00404265	0.296634	Down
ENSG00000164649	CDCA7L	-0.4331	3.65568	7.35262	0.00669652	0.333128	Down
ENSG00000165115	KIF27	-0.457799	3.37895	6.03283	0.0140422	0.3648	Down
ENSG00000165209	STRBP	-0.299864	3.96969	4.40128	0.0359119	0.467615	Down
ENSG00000165533	TTC8	-0.318447	1.0034	5.52854	0.0187087	0.392909	Down
ENSG00000165874	SHLD2P1	-0.406335	0.0158833	5.47954	0.0192403	0.396634	Down
ENSG00000166342	NETO1	-0.588514	-0.390399	7.13248	0.00756999	0.339302	Down
ENSG00000166359	WDR88	-0.532417	0.122311	7.82903	0.00514136	0.307354	Down
ENSG00000166831	RBPMS2	-2.21786	0.563035	31.8503	1.67e-08	0.00104428	Down
ENSG00000167528	ZNF641	-0.344443	6.71195	5.69785	0.0169857	0.378897	Down
ENSG00000168502	MTCL1	-0.704081	-0.671383	10.5593	0.00115605	0.252365	Down
ENSG00000169047	IRS1	-0.426619	1.62554	6.71622	0.00955402	0.354306	Down
ENSG00000169116	PARM1	-0.46191	1.75133	4.92484	0.0264733	0.441127	Down
ENSG00000169255	B3GALNT1	-0.527657	-0.436574	5.25021	0.0219441	0.421217	Down
ENSG00000169398	PTK2	-0.269791	3.21169	3.93674	0.0472422	0.529266	Down
ENSG00000169607	CKAP2L	-0.873125	-1.25756	12.4102	0.000426994	0.193989	Down
ENSG00000169679	BUB1	-0.442179	1.18412	6.79239	0.00915471	0.350896	Down
ENSG00000170312	CDK1	-0.477213	-0.307893	4.11218	0.0425754	0.502901	Down
ENSG00000170949	ZNF160	-0.360691	4.9495	9.17492	0.00245354	0.296541	Down
ENSG00000170954	ZNF415	-0.675685	0.0201856	8.04525	0.00456231	0.301168	Down
ENSG00000171109	MFN1	-0.28481	5.11536	4.42557	0.0354043	0.465842	Down
ENSG00000171295	ZNF440	-0.304019	3.55704	6.03567	0.0140196	0.3648	Down
ENSG00000171444	MCC	-0.435037	2.69603	5.36815	0.0205077	0.408378	Down
ENSG00000171522	PTGER4	-0.400508	5.50752	3.98508	0.0459049	0.52133	Down
ENSG00000171617	ENC1	-0.462798	4.24012	5.04613	0.024681	0.441127	Down
ENSG00000171798	KNDC1	-0.676694	2.13372	5.03105	0.0248968	0.441127	Down
ENSG00000171848	RRM2	-0.478922	2.19764	4.34761	0.0370608	0.473337	Down
ENSG00000172296	SPTLC3	-0.55798	-0.703029	6.36418	0.0116447	0.3648	Down
ENSG00000172748	ZNF596	-0.483164	1.21918	6.6028	0.0101819	0.361751	Down
ENSG00000173585	CCR9	-0.489949	1.59685	6.0032	0.0142799	0.3648	Down
ENSG00000173588	CEP83	-0.372557	1.7679	5.1171	0.0236912	0.434913	Down
ENSG00000174371	EXO1	-0.72169	-1.1489	9.20471	0.00241394	0.296541	Down
ENSG00000174514	MFSD4A	-0.44887	0.520189	6.00642	0.0142539	0.3648	Down
ENSG00000174652	ZNF266	-0.275802	6.65779	4.47051	0.0344847	0.461095	Down
ENSG00000175768	TOMM5	-0.357458	0.414887	6.31746	0.0119554	0.3648	Down
ENSG00000176714	CCDC121	-0.302006	0.91512	3.87561	0.0489925	0.538367	Down
ENSG00000177324	BEND2	-0.494804	1.67774	5.15757	0.0231453	0.430411	Down
ENSG00000177570	SAMD12	-0.545519	1.2493	7.9607	0.00478039	0.303047	Down
ENSG00000177602	HASPIN	-0.456861	-0.860216	5.95685	0.0146602	0.3648	Down
ENSG00000177606	JUN	-0.333374	3.2872	5.81311	0.0159072	0.370419	Down
ENSG00000179299	NSUN7	-0.391617	3.00429	4.07096	0.0436266	0.508328	Down
ENSG00000179388	EGR3	-0.478603	0.0953847	4.27369	0.0387069	0.483239	Down
ENSG00000180543	TSPYL5	-0.354247	1.66451	4.4224	0.0354701	0.466005	Down
ENSG00000180769	WDFY3-AS2	-0.395414	0.0104474	4.83994	0.0278078	0.441127	Down
ENSG00000180787	ZFP3	-0.272457	3.62322	5.53324	0.0186585	0.392376	Down
ENSG00000181544	FANCB	-0.399488	0.747197	4.09179	0.0430919	0.505953	Down
ENSG00000182405	PGBD4	-0.421626	2.15436	5.48932	0.019133	0.395494	Down
ENSG00000182534	MXRA7	-1.15109	3.25507	17.0886	3.57e-05	0.115832	Down
ENSG00000182890	GLUD2	-0.397359	-0.469742	4.30589	0.0379805	0.478938	Down
ENSG00000183010	PYCR1	-0.537304	-0.822736	5.79125	0.0161061	0.371812	Down
ENSG00000183044	ABAT	-0.397695	5.0748	6.5842	0.0102888	0.362412	Down
ENSG00000183690	EFHC2	-0.43375	1.9194	4.97176	0.0257644	0.441127	Down
ENSG00000183960	KCNH8	-0.635658	1.20687	4.93011	0.0263926	0.441127	Down
ENSG00000184005	ST6GALNAC3	-0.377721	1.40001	5.44261	0.0196513	0.400785	Down
ENSG00000184226	PCDH9	-0.896155	2.07427	8.0955	0.00443752	0.301168	Down
ENSG00000186265	BTLA	-0.359672	3.83881	3.95696	0.046678	0.526376	Down
ENSG00000186496	ZNF396	-0.374618	1.81915	4.34406	0.0371384	0.474032	Down
ENSG00000187166	H1-7	-0.846805	-1.43358	10.2708	0.00135151	0.260859	Down
ENSG00000187621	TCL6	-0.679456	2.75041	6.016	0.0141768	0.3648	Down
ENSG00000187676	B3GLCT	-0.265141	2.28032	4.20764	0.0402423	0.491738	Down
ENSG00000187699	C2orf88	-0.417674	3.733	6.4327	0.0112038	0.3648	Down
ENSG00000187800	PEAR1	-0.409725	2.16641	3.85897	0.0494807	0.541241	Down
ENSG00000189057	FAM111B	-0.65865	0.383648	7.49055	0.00620235	0.324124	Down
ENSG00000196159	FAT4	-0.665919	-0.937951	4.17838	0.0409429	0.495108	Down
ENSG00000196787	H2AC11	-0.680761	-0.6304	7.24105	0.00712555	0.338409	Down
ENSG00000197467	COL13A1	-1.47758	1.05789	14.5224	0.000138499	0.173858	Down
ENSG00000197497	ZNF665	-0.364513	1.11118	5.76331	0.0163642	0.373164	Down
ENSG00000197705	KLHL14	-0.582303	2.00716	5.99491	0.0143472	0.3648	Down
ENSG00000197992	CLEC9A	-0.492647	1.63927	3.9474	0.0469439	0.527666	Down
ENSG00000198753	PLXNB3	-0.503861	-1.23175	4.2607	0.0390039	0.485344	Down
ENSG00000200087	SNORA73B	-2.04024	1.36342	7.74445	0.00538777	0.312229	Down
ENSG00000202058	RN7SKP80	-1.13177	1.08911	4.28031	0.0385564	0.482391	Down
ENSG00000205038	PKHD1L1	-0.61637	1.35738	11.3466	0.000755869	0.232369	Down
ENSG00000205578	POM121B	-0.403928	0.483823	4.27298	0.0387229	0.48334	Down
ENSG00000205683	DPF3	-0.302717	0.75351	3.90581	0.0481194	0.533989	Down
ENSG00000211689	TRGC1	-0.765287	2.45688	5.33179	0.0209399	0.411257	Down
ENSG00000211695	TRGV9	-0.895113	2.48014	9.63447	0.0019096	0.290657	Down
ENSG00000211821	TRDV2	-0.905712	2.02531	4.80876	0.0283155	0.441127	Down
ENSG00000211965	IGHV3-49	-0.676768	1.0597	5.91512	0.0150115	0.3648	Down
ENSG00000213131	YWHAZP4	-0.644622	-2.15669	7.20687	0.00726249	0.339302	Down
ENSG00000214797	ENSG00000214797	-0.491652	-0.353793	6.34409	0.0117773	0.3648	Down
ENSG00000214832	UPF3AP2	-0.687114	-1.79186	8.78604	0.00303544	0.296634	Down
ENSG00000215105	TTC3P1	-0.50474	0.000475639	4.6214	0.0315754	0.452282	Down
ENSG00000215483	LINC00598	-0.463355	-0.661121	6.76246	0.00930953	0.351983	Down
ENSG00000215817	ZC3H11B	-0.319141	3.27948	3.90444	0.0481587	0.534236	Down
ENSG00000218418	ENSG00000218418	-0.469394	-0.262837	4.65063	0.0310421	0.449324	Down
ENSG00000218890	NUFIP1P1	-0.531218	-2.26367	4.82871	0.0279896	0.441127	Down
ENSG00000221843	C2orf16	-0.361635	0.324851	7.34919	0.00670932	0.333128	Down
ENSG00000221930	DENND10P1	-0.280941	1.74446	4.08308	0.0433146	0.50667	Down
ENSG00000221944	TIGD1	-0.39132	1.56884	4.1451	0.0417551	0.497785	Down
ENSG00000222005	LINC01118	-0.445826	-1.73454	4.34767	0.0370595	0.473337	Down
ENSG00000224183	SDHDP6	-0.512135	1.14298	8.5436	0.00346738	0.296634	Down
ENSG00000224903	RNF32-AS1	-0.378217	-0.416652	5.31778	0.0211089	0.413668	Down
ENSG00000224934	GOT1-DT	-0.328772	1.5852	3.8668	0.0492504	0.539629	Down
ENSG00000224976	PARP4P2	-0.747275	-2.11968	9.92682	0.00162888	0.274578	Down
ENSG00000225568	ENSG00000225568	-0.510124	-1.75522	5.07575	0.0242628	0.440765	Down
ENSG00000225880	LINC00115	-0.303554	0.80452	4.29382	0.0382511	0.48013	Down
ENSG00000226245	ZNF32-AS1	-0.39513	-0.858081	5.0947	0.0239991	0.438126	Down
ENSG00000226352	PSPC1-AS2	-0.373599	-0.0380699	4.79793	0.0284939	0.441127	Down
ENSG00000226478	UPF3AP1	-0.66	-0.957347	11.5615	0.000673301	0.228231	Down
ENSG00000226530	ENSG00000226530	-0.542378	0.105379	5.23644	0.0221184	0.422586	Down
ENSG00000227268	KLLN	-0.366483	0.506851	5.13836	0.0234027	0.432916	Down
ENSG00000227354	RBM26-AS1	-0.704632	0.522265	9.1153	0.00253481	0.296541	Down
ENSG00000228329	LINC01890	-0.351575	-0.30867	4.21743	0.0400108	0.490821	Down
ENSG00000228623	ZNF883	-0.497713	-1.33599	4.51952	0.0335103	0.457032	Down
ENSG00000229337	ENSG00000229337	-0.445853	-1.138	4.04944	0.0441859	0.511236	Down
ENSG00000229419	RALGAPA1P1	-0.629691	0.871795	11.8956	0.000562668	0.213146	Down
ENSG00000229894	GK3P	-0.537347	0.0499491	5.88092	0.0153058	0.365439	Down
ENSG00000229932	YWHAZP3	-0.476086	1.48469	5.60936	0.0178648	0.385645	Down
ENSG00000230091	TMEM254-AS1	-0.512773	-0.194181	4.18573	0.0407658	0.494759	Down
ENSG00000230154	AIDAP1	-0.578829	-1.28676	7.08591	0.00776925	0.339944	Down
ENSG00000230438	SERPINB9P1	-0.317268	4.42327	3.86632	0.0492645	0.539629	Down
ENSG00000230555	LINC02916	-0.410964	-0.140405	4.8417	0.0277796	0.441127	Down
ENSG00000230756	RHOQP3	-0.363496	0.075138	4.53886	0.0331337	0.456731	Down
ENSG00000230869	AGAP10P	-0.313813	1.17543	4.40168	0.0359036	0.467605	Down
ENSG00000231245	C1DP1	-0.592086	-0.965302	4.02865	0.0447336	0.5154	Down
ENSG00000232320	MXRA7P1	-0.842707	-0.366614	9.75162	0.00179165	0.286666	Down
ENSG00000232702	ENSG00000232702	-0.353352	0.556019	6.12499	0.0133284	0.3648	Down
ENSG00000232727	YWHAEP1	-0.405712	-1.65212	4.65028	0.0310485	0.449324	Down
ENSG00000232742	RHOQP2	-0.394011	-0.81311	4.43051	0.035302	0.465304	Down
ENSG00000232774	ENSG00000232774	-0.365141	-0.326589	4.08909	0.043161	0.506324	Down
ENSG00000233337	UBE2FP3	-0.338158	-0.247993	4.66327	0.0308144	0.44845	Down
ENSG00000233913	RPL10P9	-0.801642	6.26333	4.51454	0.033608	0.457601	Down
ENSG00000234337	ENSG00000234337	-0.317662	-0.0605459	4.51767	0.0335464	0.457425	Down
ENSG00000234511	C5orf58	-0.566541	1.39491	6.46383	0.0110092	0.3648	Down
ENSG00000234558	API5P1	-0.454717	-1.04489	4.33078	0.0374292	0.475331	Down
ENSG00000234572	LINC01800	-0.681746	-0.704078	8.68229	0.00321317	0.296634	Down
ENSG00000234684	SDCBP2-AS1	-0.289423	2.16531	4.73115	0.0296211	0.442535	Down
ENSG00000236345	SCAT8	-0.364614	2.16586	3.8721	0.0490951	0.538367	Down
ENSG00000236349	SUCLG2P2	-0.505394	-1.42872	6.59139	0.0102473	0.362405	Down
ENSG00000236901	MIR600HG	-0.339773	4.21375	4.48364	0.0342208	0.46016	Down
ENSG00000237840	FAM21FP	-0.487809	-1.34535	6.09862	0.0135287	0.3648	Down
ENSG00000238243	OR2W3	-0.722875	3.74182	4.06267	0.0438412	0.509378	Down
ENSG00000239819	IGKV1D-8	-0.709228	-0.338773	4.76073	0.0291162	0.441127	Down
ENSG00000240135	PSMD12P1	-0.751745	-2.21018	9.48229	0.00207465	0.291695	Down
ENSG00000240445	FOXO3B	-0.385521	2.47511	5.86411	0.0154527	0.366642	Down
ENSG00000240875	LINC00886	-0.590751	0.613974	7.06929	0.00784165	0.339989	Down
ENSG00000241135	LINC00881	-0.743105	-2.06256	7.14259	0.00752742	0.339302	Down
ENSG00000241404	EGFL8	-0.384808	-0.440761	4.86518	0.0274039	0.441127	Down
ENSG00000241945	PWP2	-0.845329	1.97	4.69873	0.0301848	0.445806	Down
ENSG00000242154	ENSG00000242154	-0.573861	-1.89466	6.42016	0.0112832	0.3648	Down
ENSG00000242265	PEG10	-0.622191	0.458726	4.40824	0.0357658	0.466992	Down
ENSG00000242457	RBBP4P2	-0.416213	-1.07505	6.23566	0.0125203	0.3648	Down
ENSG00000242736	TRBV1	-0.596949	-1.18645	8.90698	0.00284083	0.296541	Down
ENSG00000244171	PBX2P1	-0.319971	0.337282	4.33737	0.0372845	0.474577	Down
ENSG00000244926	ALKBH3-AS1	-0.617648	-1.01374	10.8591	0.000983095	0.239072	Down
ENSG00000246203	ENSG00000246203	-0.830182	1.14734	13.1795	0.000283031	0.186628	Down
ENSG00000246263	UBR5-DT	-0.480694	3.62733	4.12866	0.0421628	0.500763	Down
ENSG00000247199	FBXO38-DT	-0.365858	-0.0521961	6.71551	0.00955781	0.354306	Down
ENSG00000248309	MEF2C-AS1	-0.370943	0.730923	6.89964	0.00862129	0.346851	Down
ENSG00000248727	LINC01948	-0.501206	2.87422	6.4271	0.0112392	0.3648	Down
ENSG00000249129	SUDS3P1	-0.363579	1.0135	5.66835	0.0172737	0.380096	Down
ENSG00000249476	ENSG00000249476	-0.362403	2.59874	4.35377	0.0369271	0.473126	Down
ENSG00000249839	ENSG00000249839	-0.870875	-0.427414	13.9665	0.000186099	0.173858	Down
ENSG00000250274	ENSG00000250274	-0.485528	-0.318786	5.33824	0.0208625	0.41094	Down
ENSG00000250461	ENSG00000250461	-0.449118	-0.102658	6.67422	0.00978174	0.357467	Down
[truncated: 64 more rows]

## Sheet: S5
Table S5. GO and KEGG enrichment analysis using 1,720 up-regulated genes between CON and Responders (Fig.2B(ii))
Category	ID	Term	Count	PValue	FDR	Fold Enrichment	Genes
GOTERM_BP_DIRECT	GO:0042776	proton motive force-driven mitochondrial ATP synthesis	25	2.41418e-12	9.83539e-09	5.64248	NDUFAB1, ATP5F1D, ATP5ME, ATP5PF, NDUFA8, NDUFS2, ATP5PD, NDUFS5, STOML2, NDUFA3, NDUFS6, NDUFS8, ATP5MF, NDUFB2, NDUFA11, NDUFB7, NDUFC2, NDUFS3, NDUFS7, NDUFB10, NDUFV1, NDUFB11, NDUFB9, ATP5PO, NDUFA1
GOTERM_BP_DIRECT	GO:0009060	aerobic respiration	23	1.95758e-10	3.98758e-07	5.11474	NDUFAB1, NDUFB2, ATP5F1D, NDUFA11, NDUFB7, BLOC1S1, NDUFC2, NDUFS2, SURF1, NDUFA8, NDUFS3, NDUFS7, UQCRC1, NDUFB10, MDH2, NDUFS5, NDUFV1, NDUFS6, NDUFA3, NDUFB9, NDUFB11, NDUFS8, NDUFA1
GOTERM_BP_DIRECT	GO:0032543	mitochondrial translation	25	1.56339e-08	2.12308e-05	3.85761	MRPL52, MRPL34, MRPL40, MRPL14, MRPL51, MRPL27, MRPL57, MRPL20, MRPL24, MRPL37, MRPL17, MRPS7, MRPL55, MRPL54, MRPS2, MRPL21, CHCHD1, MRPS15, MRPS34, AURKAIP1, MRPL28, MRPL41, MRPL12, MRPS12, MRPL4
GOTERM_BP_DIRECT	GO:0032981	mitochondrial respiratory chain complex I assembly	20	3.82398e-08	3.60961e-05	4.51398	NDUFAB1, NDUFB2, NDUFAF3, NDUFA11, NDUFB7, NDUFC2, NDUFS2, NDUFA8, NDUFS3, NDUFS7, NDUFB10, NDUFS5, NDUFAF8, NDUFA3, NDUFB9, NDUFB11, TAFAZZIN, NDUFS8, DMAC2, NDUFA1
GOTERM_BP_DIRECT	GO:0006412	translation	37	4.43006e-08	3.60961e-05	2.76984	RPL28, RPS3, MRPL52, MRPL34, MRPL51, MRPL27, MRPL20, RPL36, MRPL24, MRPL37, RPS9, MRPL17, RPS16, RPL18, MRPS7, MRPL55, RPS19, RPL36AL, RPLP1, DHPS, MRPS2, RPS6KB2, MRPS15, RPS15, FAU, RPS28, MRPL28, RPL3, MRPL41, MRPL12, MRPS12, RPL19, RPL29, RPL10, MRPL4, RPL8, RPL18A
GOTERM_BP_DIRECT	GO:0006120	mitochondrial electron transport, NADH to ubiquinone	16	1.34513e-07	9.13344e-05	5.25977	NDUFAB1, NDUFB2, NDUFB7, NDUFC2, NDUFS2, NDUFA8, NDUFS3, NDUFS7, NDUFB10, NDUFS5, NDUFV1, NDUFS6, NDUFA3, NDUFB9, NDUFS8, NDUFA1
GOTERM_BP_DIRECT	GO:1902600	proton transmembrane transport	25	1.3177e-05	0.00766901	2.71976	ATP6AP1, SLC15A3, ATP5F1D, UCP2, ATP5ME, ATP5PF, COX4I1, COX5B, ATP5PD, ATP5MC1, STING1, COX8A, COX5A, ATP5MF, ATP5MC3, ATP6V0D1, SURF1, UQCRC1, ATP5MC2, SLC18A1, SLC47A1, ATP5PO, COX6B1, CYC1, ATP6V1F
GOTERM_BP_DIRECT	GO:0015986	proton motive force-driven ATP synthesis	9	0.000189807	0.0782314	5.23448	ATP5PD, ATP5MC2, ATP5MC1, ATP5MF, ATP5F1D, ATP5MC3, ATP5ME, ATP5PO, ATP5PF
GOTERM_BP_DIRECT	GO:0002181	cytoplasmic translation	18	0.000191801	0.0782314	2.80611	RPS3, RPL28, RPLP1, RPS15, RPL36, FAU, RPS28, RPS9, RPL3, RPS16, RPL18, RPL19, RPS19, RPL29, RPL10, RACK1, RPL8, RPL18A
GOTERM_BP_DIRECT	GO:0045739	positive regulation of DNA repair	12	0.000192026	0.0782314	3.8609	RUVBL2, RPS3, CBX8, H2AX, TRIM28, ENSG00000259802, MCRS1, BABAM1, TMEM161A, TFPT, WRAP53, BABAM2
GOTERM_BP_DIRECT	GO:0006626	protein targeting to mitochondrion	9	0.000335414	0.124225	4.86059	BCAP31, TOMM40, AIP, TOMM7, TIMM13, TIMM10, TIMM17B, TSPO, TIMM44
GOTERM_BP_DIRECT	GO:0000387	spliceosomal snRNP assembly	9	0.00056116	0.190514	4.53655	PRMT7, LSM4, TSSC4, SNRPF, SNRPB, SNRPD2, SART1, SNRPE, SNRPC
GOTERM_BP_DIRECT	GO:0045333	cellular respiration	10	0.000987375	0.307527	3.78046	COX6C, UQCRC1, COX5A, COX8A, CHCHD5, COX6B1, CYC1, COX4I1, COX5B, MTLN
GOTERM_BP_DIRECT	GO:0043277	apoptotic cell clearance	7	0.0010568	0.307527	5.5712	TYROBP, MARCO, ALOX15, GAS6, ADGRB1, LRP1, NR1H3
GOTERM_BP_DIRECT	GO:0006629	lipid metabolic process	27	0.0014012	0.380566	1.95354	NR1H3, ALDH3B1, PAFAH1B3, AKR7A2, HSD17B13, PGAP6, G6PD, MGST3, LRP1, CPNE1, EPHX3, BCAT2, FADS2, LCAT, FADS1, ALOX15, AKR1A1, GDPD5, SLC16A11, TPRA1, CEL, SDSL, ANO9, PTGES2, NR1H2, ALOX15B, HSD17B10
GOTERM_BP_DIRECT	GO:0050832	defense response to fungus	9	0.00203737	0.518765	3.78046	COTL1, MPO, DEFA1B, CTSG, TGFB1, DEFA1, GAPDH, JAGN1, DEFA4
GOTERM_BP_DIRECT	GO:0007041	lysosomal transport	7	0.00313125	0.750395	4.6023	GRN, SLC48A1, ATP13A2, SPTBN5, USE1, LRP1, PSAP
GOTERM_BP_DIRECT	GO:0050829	defense response to Gram-negative bacterium	15	0.00376036	0.851094	2.38766	DEFA1B, PYCARD, DEFA1, ADGRB1, GSDMD, AZU1, CAMP, CTSG, RNASE3, BPI, ROMO1, RPS19, LTF, DEFA4, CD4
GOTERM_BP_DIRECT	GO:0006886	intracellular protein transport	32	0.00397215	0.851713	1.70989	AP1S1, BCAP31, STXBP2, TMED1, ARF5, AP2S1, SNX17, RAB24, ERP29, TMED9, TIMM50, TMED3, VPS18, SYTL1, AP2M1, STX5, TIMM44, SNX8, CD74, PICK1, UNC93B1, STX10, CLTB, SIL1, ASPSCR1, CLTA, ACD, ROMO1, TIMM17B, ARFRP1, CDK5, RAB38
GOTERM_BP_DIRECT	GO:0006364	rRNA processing	18	0.00419416	0.85435	2.14325	WDR74, PIH1D1, FBL, NOC4L, EXOSC5, IMP4, WDR18, RRP9, RPS15, POP7, RPS28, SUV39H1, PES1, RPS16, RPS19, NOP53, DDX49, RRP1
GOTERM_BP_DIRECT	GO:1903241	U2-type prespliceosome assembly	7	0.00490482	0.951536	4.23411	SF3B5, SF3B4, SNRPF, SNRPB, SF3A2, SNRPD2, SNRPE
GOTERM_BP_DIRECT	GO:0006935	chemotaxis	17	0.00605264	0.998529	2.12456	CCR3, DEFA1B, ZNF580, CMTM7, TYMP, DEFA1, RNASE2, HRAS, LGALS9, RAC3, RNASE3, PLP2, CCL23, CXCR3, PTGDR2, CREB3, FES
GOTERM_BP_DIRECT	GO:0055085	transmembrane transport	28	0.00665967	0.998529	1.72118	ABCB6, NDUFA8, NDUFS2, NDUFS5, NDUFA3, NDUFS6, NDUFS8, MFSD3, SLC35A4, NDUFB2, ATP13A1, SLC66A1, NDUFB7, GSDMD, NDUFC2, NDUFS3, CYB561D2, NDUFB10, MFSD2A, SLC47A1, SLC10A3, ATP13A2, NDUFV1, NDUFB9, SLC2A6, RNF5, NDUFA1, SPNS3
GOTERM_BP_DIRECT	GO:0071816	tail-anchored membrane protein insertion into ER membrane	6	0.00666012	0.998529	4.77532	GET4, EMC10, GET3, SLC10A3, SGTA, EMC9
GOTERM_BP_DIRECT	GO:0006979	response to oxidative stress	17	0.00708187	0.998529	2.09001	COMT, NUDT1, ERCC2, HMOX1, ERCC1, BANF1, ATOX1, NDUFS2, ALDH3B1, PARK7, PSMB5, MPO, NAPRT, TXN2, GSS, HMOX2, NDUFS8
GOTERM_BP_DIRECT	GO:0016226	iron-sulfur cluster assembly	8	0.00710016	0.998529	3.45642	LYRM4, HSCB, NDUFAB1, ENSG00000285130, CIAO2B, NUBP2, CIAO3, ISCA2
GOTERM_BP_DIRECT	GO:0035307	positive regulation of protein dephosphorylation	7	0.00732225	0.998529	3.92048	SMPD1, PPIA, TGFB1, PTPA, NSMF, PIN1, PPP1R7
GOTERM_BP_DIRECT	GO:0000398	mRNA splicing, via spliceosome	24	0.00762065	0.998529	1.79665	LSM4, XAB2, RBM42, YJU2, SF3A2, SNRPA, UBL5, SART1, PRPF31, LSM7, SF3B5, SF3B4, NHP2, SNRPF, SNRPB, SNU13, SNRPD2, U2AF1L4, RALY, DDX41, SNRPE, WDR83, SNRPC, ENSG00000275895
GOTERM_BP_DIRECT	GO:0007007	inner mitochondrial membrane organization	6	0.00840482	0.998529	4.53655	SAMM50, MICOS13, CHCHD6, TAFAZZIN, APOO, TMEM11
GOTERM_BP_DIRECT	GO:0019731	antibacterial humoral response	12	0.00996618	0.998529	2.41949	FAU, DEFA1B, TRBC2, CAMP, CTSG, HLA-A, RNASE3, DEFA1, AZU1, LTF, DEFA4, ANG
GOTERM_BP_DIRECT	GO:0043651	linoleic acid metabolic process	6	0.010442	0.998529	4.32053	FADS2, FADS1, ALOX15, ABCD1, ALOX15B, GSTP1
GOTERM_BP_DIRECT	GO:0030150	protein import into mitochondrial matrix	6	0.010442	0.998529	4.32053	TOMM40, TOMM7, ROMO1, TIMM17B, TIMM50, TIMM44
GOTERM_BP_DIRECT	GO:0042274	ribosomal small subunit biogenesis	12	0.0109771	0.998529	2.38766	RPS28, FBL, RPS9, IMP4, SNU13, RPS16, RRP9, TBL3, RPS19, RPS15, WDR46, RPS19BP1
GOTERM_BP_DIRECT	GO:0010867	positive regulation of triglyceride biosynthetic process	5	0.0111223	0.998529	5.40066	MFSD2A, CTDNEP1, SLC27A1, NR1H2, NR1H3
GOTERM_BP_DIRECT	GO:0002227	innate immune response in mucosa	8	0.0112195	0.998529	3.18355	FAU, DEFA1B, CAMP, RNASE3, DEFA1, RNASE2, LTF, DEFA4
GOTERM_BP_DIRECT	GO:0036261	7-methylguanosine cap hypermethylation	4	0.0125341	0.998529	7.56092	SNRPF, SNRPB, SNRPD2, SNRPE
GOTERM_BP_DIRECT	GO:0010756	positive regulation of plasminogen activation	4	0.0125341	0.998529	7.56092	ENO1, ANXA2, MELTF, F12
GOTERM_BP_DIRECT	GO:0046598	positive regulation of viral entry into host cell	5	0.0143865	0.998529	5.04061	SMPD1, CD74, LGALS9, LGALS1, CD4
GOTERM_BP_DIRECT	GO:0000028	ribosomal small subunit assembly	5	0.0143865	0.998529	5.04061	RPS28, MRPS7, ERAL1, RPS19, RPS15
GOTERM_BP_DIRECT	GO:0016192	vesicle-mediated transport	25	0.0154828	0.998529	1.6654	AP1S1, AP5Z1, STXBP2, VPS4A, RIN1, ARF5, AP2S1, SNX17, MON1A, RAB44, CPNE1, ARFGAP1, AP2M1, STX5, LGALS3BP, RABAC1, TRAPPC1, JAGN1, CLTB, CD320, CLTA, RIN3, CDK5, CACFD1, RAB38
GOTERM_BP_DIRECT	GO:0006094	gluconeogenesis	9	0.0159819	0.998529	2.72193	ENO1, MDH2, C1QTNF12, FBP1, TPI1, SLC25A11, G6PC3, GPI, SLC25A1
GOTERM_BP_DIRECT	GO:0006909	phagocytosis	11	0.017852	0.998529	2.34282	ELMO3, CD14, ANXA11, CEBPE, SLC48A1, ELANE, CORO1A, GAS6, PLD4, LRP1, P2RY6
GOTERM_BP_DIRECT	GO:0034340	response to type I interferon	4	0.0178877	0.998529	6.72082	SMPD1, ISG15, SHFL, SHMT2
GOTERM_BP_DIRECT	GO:0042407	cristae formation	5	0.0181978	0.998529	4.72557	SAMM50, MICOS13, CHCHD6, TAFAZZIN, APOO
GOTERM_BP_DIRECT	GO:0071294	cellular response to zinc ion	6	0.0185111	0.998529	3.78046	ATP13A2, P2RX4, MT2A, TSPO, MT1F, MT1E
GOTERM_BP_DIRECT	GO:0046686	response to cadmium ion	6	0.0185111	0.998529	3.78046	NUDT1, ERCC1, GSS, DTYMK, HAAO, GPI
GOTERM_BP_DIRECT	GO:0042098	T cell proliferation	8	0.0215411	0.998529	2.81337	IDO1, CD151, TNFRSF4, CORO1A, TGFB1, HES1, PSMB10, IL20RB
GOTERM_BP_DIRECT	GO:0032722	positive regulation of chemokine production	8	0.0215411	0.998529	2.81337	AGER, CD74, HMOX1, PYCARD, CARD9, AIF1, ALOX15B, CSF1R
GOTERM_BP_DIRECT	GO:0005975	carbohydrate metabolic process	18	0.021889	0.998529	1.8026	RENBP, PGLS, NAGPA, MAN2B1, CHID1, B3GAT3, NAGA, IDH3G, PIGQ, AKR7A2, AKR1B1, SLC3A2, AMDHD2, IDH2, IDUA, DPM3, GBGT1, GPI
GOTERM_BP_DIRECT	GO:0007166	cell surface receptor signaling pathway	32	0.0221024	0.998529	1.50747	TRBV11-2, LILRB4, CDA, TNFRSF13B, TRBV6-6, HRAS, CD101, CLEC1A, TRBV13, TRBV7-2, CD70, PRMT1, ADAP1, LY6E, ASGR2, MARCO, VIPR1, TRBV7-7, TRBV6-2, TNK2, ADGRB1, DOK1, AGER, VSTM1, TRBV14, CD14, ADGRE1, GAS6, DOK2, CXCR3, CD4, LAG3
GOTERM_BP_DIRECT	GO:0006631	fatty acid metabolic process	13	0.022444	0.998529	2.0693	ILVBL, DBI, DECR2, ECH1, HSD17B8, MECR, SLC27A4, ACOT11, LYPLA2, CYP4F12, HSD17B10, ALKBH7, ACSF2
GOTERM_BP_DIRECT	GO:0098869	cellular oxidant detoxification	11	0.0232772	0.998529	2.24784	PARK7, TXNRD2, MGST1, APOM, LTC4S, SELENOW, GSTZ1, PTGES, MGST3, GSTK1, GSTP1
GOTERM_BP_DIRECT	GO:0019243	methylglyoxal catabolic process to D-lactate via S-lactoyl-glutathione	3	0.0239334	0.998529	11.3414	HAGHL, GATD1, PNKD
GOTERM_BP_DIRECT	GO:0099518	vesicle cytoskeletal trafficking	3	0.0239334	0.998529	11.3414	F8A3, F8A2, F8A1
GOTERM_BP_DIRECT	GO:0034227	tRNA thio-modification	3	0.0239334	0.998529	11.3414	CTU2, CTU1, URM1
GOTERM_BP_DIRECT	GO:0032447	protein urmylation	3	0.0239334	0.998529	11.3414	CTU2, CTU1, URM1
GOTERM_BP_DIRECT	GO:0061035	regulation of cartilage development	3	0.0239334	0.998529	11.3414	SCX, TGFB1, SMPD3
GOTERM_BP_DIRECT	GO:0032956	regulation of actin cytoskeleton organization	13	0.0241642	0.998529	2.04775	BST2, SH3BP1, TGFB1, HRAS, RHOG, TWF2, CORO1A, RAC3, LRP1, ARHGEF19, CSF1R, DAPK3, MLST8
GOTERM_BP_DIRECT	GO:0036109	alpha-linolenic acid metabolic process	4	0.0243169	0.998529	6.04874	FADS2, FADS1, ABCD1, ACOT8
GOTERM_BP_DIRECT	GO:0045657	positive regulation of monocyte differentiation	4	0.0243169	0.998529	6.04874	CD74, FES, IL34, CD4
GOTERM_BP_DIRECT	GO:0032091	negative regulation of protein binding	9	0.0245902	0.998529	2.52031	PARK7, DNAJB2, TLE5, CAMK1, BAX, SYMPK, GTF2F1, RACK1, PIN1
GOTERM_BP_DIRECT	GO:0006123	mitochondrial electron transport, cytochrome c to oxygen	6	0.0256952	0.998529	3.48966	COX6C, COX5A, COX8A, COX6B1, COX4I1, COX5B
GOTERM_BP_DIRECT	GO:0045786	negative regulation of cell cycle	9	0.0271676	0.998529	2.47448	RNF167, CEBPA, TP53I13, SUV39H1, TGFB1, ALOX15B, CREB3, CDK5, CDT1
GOTERM_BP_DIRECT	GO:1904263	positive regulation of TORC1 signaling	9	0.0299263	0.998529	2.4303	PIH1D1, RNF167, LAMTOR4, GPR137, WDR24, OTUB1, PRMT1, LAMTOR1, LAMTOR2
GOTERM_BP_DIRECT	GO:0044571	[2Fe-2S] cluster assembly	4	0.0318233	0.998529	5.49885	LYRM4, HSCB, NDUFAB1, ENSG00000285130
GOTERM_BP_DIRECT	GO:0031647	regulation of protein stability	12	0.0323441	0.998529	2.0389	DAD1, PANO1, ASGR2, GET4, PYCARD, TOMM7, DPM3, CD81, GIPC1, STUB1, PIN1, DDRGK1
GOTERM_BP_DIRECT	GO:0006915	apoptotic process	52	0.0326422	0.998529	1.32603	BCAP31, SHB, DAD1, MYDGF, MAP1S, PYCARD, MAP3K10, CTSH, BCL7C, GPER1, SLC25A6, BAX, EMP3, DDX41, BCL2L12, TMEM219, TNFSF12, IRF3, PUF60, PANO1, SHF, PRELID1, UNC5A, THOC6, BRMS1, CD14, MRPL41, ALOX15B, RACK1, RASSF7, LGALS1, DAPK3, RPS3, MFSD10, ERCC2, PPIA, SRA1, TMEM102, BAD, ZNF385A, LCN2, PMP22, ELMO3, GZMM, PIDD1, GAPDH, IFI27L2, BABAM2, TNFRSF18, CXCR3, MIEN1, NME3
GOTERM_BP_DIRECT	GO:0031397	negative regulation of protein ubiquitination	9	0.0360078	0.998529	2.34649	PARK7, RPS3, ISG15, VPS28, ADGRB1, ENSG00000259802, TSPO, UBXN1, CDK5
GOTERM_BP_DIRECT	GO:0006635	fatty acid beta-oxidation	8	0.0370862	0.998529	2.52031	MCAT, ECH1, ABCD1, ECI1, ACADS, HSD17B10, MTLN, ECHS1
GOTERM_BP_DIRECT	GO:0009063	amino acid catabolic process	3	0.0381545	0.998529	9.0731	ETFB, IL4I1, BCKDK
GOTERM_BP_DIRECT	GO:1990379	lipid transport across blood-brain barrier	3	0.0381545	0.998529	9.0731	MFSD2A, SLC27A4, SLC27A1
GOTERM_BP_DIRECT	GO:0006779	porphyrin-containing compound biosynthetic process	3	0.0381545	0.998529	9.0731	UROD, ABCB6, PPOX
GOTERM_BP_DIRECT	GO:2000406	positive regulation of T cell migration	5	0.0392979	0.998529	3.78046	PYCARD, CORO1A, TMEM102, AIF1, ASCL2
GOTERM_BP_DIRECT	GO:0033617	mitochondrial cytochrome c oxidase assembly	6	0.0394394	0.998529	3.12866	COA3, PET100, COX17, SMIM4, SURF1, COX14
GOTERM_BP_DIRECT	GO:0038202	TORC1 signaling	4	0.0403927	0.998529	5.04061	LAMTOR4, LAMTOR1, LAMTOR2, MLST8
GOTERM_BP_DIRECT	GO:0051873	killing by host of symbiont cells	4	0.0403927	0.998529	5.04061	DEFA1B, CAMP, DEFA1, GAPDH
GOTERM_BP_DIRECT	GO:0043161	proteasome-mediated ubiquitin-dependent protein catabolic process	25	0.0407647	0.998529	1.51826	DNAJB2, PSMD13, PSMC3, PSMB4, PSMB10, UBXN1, PSMB7, PSMD8, PSMB1, PSMB5, UBXN11, NSFL1C, ZNRF1, ADRM1, NAGLU, PSMC5, PSMA7, AGAP3, PSMB6, FBXW5, ZFAND2B, KLHDC3, KCTD17, HECTD3, STUB1
GOTERM_BP_DIRECT	GO:0006096	glycolytic process	8	0.0408965	0.998529	2.46887	ENO1, ALDOA, PFKL, PKM, TPI1, GAPDH, UCP2, GPI
GOTERM_BP_DIRECT	GO:0019369	arachidonic acid metabolic process	7	0.0412959	0.998529	2.71418	ALOX15, FAAH, ABHD12, CYP4F12, ALOX15B, MGST3, DAGLB
GOTERM_BP_DIRECT	GO:0036503	ERAD pathway	12	0.0426518	0.998529	1.95121	DNAJB2, RCN3, FBXO2, GET4, FBXO44, BRSK2, AUP1, SGTA, SDF2L1, RNF5, STUB1, TMUB1
GOTERM_BP_DIRECT	GO:0031640	killing of cells of another organism	9	0.0428711	0.998529	2.26828	DEFA1B, GZMM, DEFA1, PGLYRP1, GAPDH, ROMO1, RPS19, LTF, DEFA4
GOTERM_BP_DIRECT	GO:0042981	regulation of apoptotic process	23	0.0442981	0.998529	1.53895	RUVBL2, RPS3, PYCARD, SRA1, PHB, AKT1S1, TRAF2, HS1BP3, BRMS1, TNFAIP8L2, ATF5, CARD9, BAX, SDF2L1, CREB3, NOP53, LCMT1, CDK5, OSGIN1, VPS72, IRF3, LGALS1, DAPK3
GOTERM_BP_DIRECT	GO:0050821	protein stabilization	24	0.0451047	0.998529	1.51851	RUVBL2, PIH1D1, CD74, CDC37, PFN1, PFDN6, CRTAP, PHB, GAPDH, GLMP, TMEM88, PARK7, PPIB, TYROBP, GRN, TELO2, NCLN, SWSAP1, PEX6, NOP53, POLR2E, STUB1, PFDN2, PIN1
GOTERM_BP_DIRECT	GO:0030490	maturation of SSU-rRNA	5	0.0460875	0.998529	3.60044	RPS28, TSR3, IMP4, SNU13, RPS19
GOTERM_BP_DIRECT	GO:0043523	regulation of neuron apoptotic process	5	0.0460875	0.998529	3.60044	PARK7, ATP13A2, NSMF, G6PD, AKT1S1
GOTERM_BP_DIRECT	GO:0016236	macroautophagy	10	0.0469813	0.998529	2.10026	MAP1LC3A, HMOX1, HDAC10, VPS4A, VPS28, CHMP2A, ATG4B, VPS25, CHMP6, MVB12A
GOTERM_BP_DIRECT	GO:0007005	mitochondrion organization	13	0.046994	0.998529	1.85457	CEBPA, ENSG00000285130, ATAD3A, PHB, TMEM11, PARK7, STOML2, POLDIP2, SLIRP, ADCK1, TAFAZZIN, RAB38, HSD17B10
GOTERM_BP_DIRECT	GO:0032801	receptor catabolic process	4	0.0499975	0.998529	4.65287	TGFB1, CDK5, CAPN1, MVB12A
GOTERM_BP_DIRECT	GO:0006620	post-translational protein targeting to endoplasmic reticulum membrane	4	0.0499975	0.998529	4.65287	GET4, GET3, SLC10A3, SGTA
KEGG_PATHWAY	hsa00190	Oxidative phosphorylation	40	3.06148e-14	9.73552e-12	4.04151	ATP6AP1, NDUFAB1, ATP5F1D, ATP5ME, ATP5PF, NDUFA8, COX4I1, NDUFS2, COX5B, ATP5PD, COX17, NDUFS5, ATP5MC1, NDUFA3, NDUFS6, NDUFS8, COX6C, COX8A, COX5A, ATP5MF, NDUFB2, LHPP, NDUFA11, ATP5MC3, ATP6V0D1, NDUFB7, NDUFC2, NDUFS3, NDUFS7, UQCRC1, ATP5MC2, NDUFB10, NDUFV1, NDUFB11, NDUFB9, ATP5PO, COX6B1, CYC1, ATP6V1F, NDUFA1
KEGG_PATHWAY	hsa05016	Huntington disease	62	1.91452e-13	3.04408e-11	2.77968	PSMD13, NDUFAB1, ATP5F1D, MAP3K10, PSMB4, ATP5PF, PSMB7, PSMB1, PSMD8, NDUFS5, DCTN3, SLC25A6, BAX, TUBA4A, NDUFS6, ADRM1, CREB3, POLR2E, POLR2F, PSMC5, COX5A, PSMA7, ATP5MC3, TRAF2, NDUFC2, NDUFS3, NDUFB10, CLTA, ATG101, COX6B1, POLR2I, PSMC3, AP2S1, COX4I1, POLR2L, NDUFA8, NDUFS2, COX5B, PSMB5, ATP5PD, ATP5MC1, NDUFA3, NDUFS8, AP2M1, COX6C, COX8A, PLCB3, NDUFB2, PSMB6, NDUFA11, NDUFB7, CLTB, ND…
KEGG_PATHWAY	hsa05415	Diabetic cardiomyopathy	45	2.32959e-11	2.46937e-09	3.06071	NDUFAB1, ATP5F1D, PTPA, PPP1CA, ATP5PF, NDUFA8, COX4I1, NDUFS2, COX5B, ATP5PD, NDUFS5, SLC2A1, ATP5MC1, SLC25A6, NDUFA3, G6PD, NDUFS6, NDUFS8, COX6C, COX8A, COX5A, PLCB3, NDUFB2, TGFB1, NDUFA11, ATP5MC3, ACE, GAPDH, NDUFB7, NDUFC2, CTSD, NDUFS3, NDUFS7, UQCRC1, AGER, ATP5MC2, NDUFB10, NDUFV1, NDUFB11, NDUFB9, ATP5PO, COX6B1, CYC1, CYBA, NDUFA1
KEGG_PATHWAY	hsa05010	Alzheimer disease	66	7.11961e-11	5.66009e-09	2.35359	PSMD13, NDUFAB1, ATP5F1D, PSMB4, HRAS, ATP5PF, PSMB7, PSMB1, PSMD8, NDUFS5, MAP2K2, BACE2, SLC25A6, TUBA4A, NDUFS6, ADRM1, LRP1, PSMC5, COX5A, PSMA7, FZD2, PSENEN, ATP5MC3, TRAF2, WNT5B, NDUFC2, NDUFS3, AGER, NDUFB10, ATG101, COX6B1, HSD17B10, PSMC3, BAD, COX4I1, NDUFA8, NDUFS2, COX5B, PSMB5, ATP5PD, ARAF, ATP5MC1, NDUFA3, NDUFS8, SLC39A3, COX6C, COX8A, PLCB3, NDUFB2, PSMB6, NDUFA11, GAPDH, NDUFB…
KEGG_PATHWAY	hsa05012	Parkinson disease	52	1.00155e-10	6.36988e-09	2.67545	PSMD13, NDUFAB1, ATP5F1D, PSMB4, ATP5PF, PSMB7, PSMB1, PSMD8, PARK7, NDUFS5, SLC25A6, TXN2, BAX, TUBA4A, NDUFS6, ADRM1, PSMC5, COX5A, PSMA7, ATP5MC3, NDUFC2, NDUFS3, NDUFB10, SLC18A1, COX6B1, PSMC3, COX4I1, NDUFA8, NDUFS2, COX5B, PSMB5, ATP5PD, ATP5MC1, NDUFA3, NDUFS8, SLC39A3, COX6C, COX8A, NDUFB2, PSMB6, NDUFA11, NDUFB7, NDUFS7, UQCRC1, ATP5MC2, SLC39A4, NDUFV1, NDUFB11, NDUFB9, ATP5PO, CYC1, N…
KEGG_PATHWAY	hsa05208	Chemical carcinogenesis - reactive oxygen species	46	1.94789e-10	1.00561e-08	2.838	NDUFAB1, ATP5F1D, HRAS, BAD, ATP5PF, NDUFA8, COX4I1, NDUFS2, COX5B, ATP5PD, ARAF, NDUFS5, MGST1, MAP2K2, ATP5MC1, SLC25A6, NDUFA3, NDUFS6, MGST3, EPHX3, NDUFS8, COX6C, COX8A, COX5A, HMOX1, NDUFB2, NDUFA11, ATP5MC3, NDUFB7, AKR1A1, NDUFC2, CBR1, NDUFS3, NDUFS7, UQCRC1, ATP5MC2, NDUFB10, NDUFV1, NDUFB11, PLD2, NDUFB9, ATP5PO, COX6B1, CYC1, CYBA, NDUFA1
KEGG_PATHWAY	hsa04714	Thermogenesis	47	2.2136e-10	1.00561e-08	2.78864	NDUFAB1, ATP5F1D, NDUFAF3, HRAS, ATP5ME, AKT1S1, ATP5PF, NDUFA8, COX4I1, NDUFS2, COX5B, ATP5PD, COX17, NDUFS5, ATP5MC1, NDUFA3, NDUFS6, CREB3, NDUFS8, MLST8, COX6C, SMARCB1, COX8A, COA3, COX5A, ATP5MF, NDUFB2, RPS6KB2, NDUFA11, ATP5MC3, NDUFB7, SIRT6, NDUFC2, COX14, NDUFS3, NDUFS7, UQCRC1, ATP5MC2, NDUFB10, NDUFAF8, NDUFV1, NDUFB11, NDUFB9, ATP5PO, COX6B1, CYC1, NDUFA1
KEGG_PATHWAY	hsa01100	Metabolic pathways	171	1.42852e-09	5.67839e-08	1.52741	ENO1, DAD1, PGLS, NDUFAB1, ETHE1, BLVRA, SRM, GSTP1, PEMT, GRHPR, GALNT8, IDH3G, NDUFS5, AKR1B1, FBP1, GSS, NDUFS6, EBP, MGST3, SMPD3, PLD3, COX5A, MCAT, HMOX1, B3GALT4, PFKL, ATP5MF, ALOX15, ATP5MC3, HSD3B7, AKR1A1, NDUFC2, NDUFB10, MECR, SDSL, SUV39H1, TKT, GSTZ1, PLD2, GPI, ATP6V1F, HSD17B10, PPOX, CDA, DTYMK, FPGS, KMT5C, COX5B, ACP2, ALDH3B1, ASRGL1, ATP5PD, COX17, NAPRT, DHRS4L2, MGST1, ATP…
KEGG_PATHWAY	hsa05020	Prion disease	50	2.45021e-09	8.65742e-08	2.50777	PSMD13, NDUFAB1, ATP5F1D, PSMB4, ATP5PF, PSMB7, PSMB1, PSMD8, NDUFS5, SLC25A6, BAX, TUBA4A, NDUFS6, ADRM1, CREB3, PSMC5, COX5A, PSMA7, ATP5MC3, NDUFC2, NDUFS3, NDUFB10, COX6B1, PSMC3, BAD, COX4I1, NDUFA8, NDUFS2, COX5B, PSMB5, ATP5PD, ATP5MC1, NDUFA3, NDUFS8, COX6C, COX8A, NDUFB2, PSMB6, NDUFA11, NDUFB7, NDUFS7, UQCRC1, ATP5MC2, NDUFV1, NDUFB11, NDUFB9, ATP5PO, CYC1, CYBA, NDUFA1
KEGG_PATHWAY	hsa05014	Amyotrophic lateral sclerosis	58	2.23315e-08	7.10142e-07	2.1798	PSMD13, NDUFAB1, ATP5F1D, PSMB4, ATP5PF, PSMB7, PSMB1, PSMD8, NDUFS5, DCTN3, BAX, TUBA4A, NDUFS6, ADRM1, NUP210L, ANG, PSMC5, MAP1LC3A, COX5A, PSMA7, TOMM40, ATP5MC3, TRAF2, NDUFC2, NDUFS3, NDUFB10, ALYREF, ATG101, COX6B1, PSMC3, BAD, COX4I1, NDUFA8, NDUFS2, COX5B, PSMB5, ATP5PD, ANXA11, ATP5MC1, NDUFA3, NDUFS8, COX6C, COX8A, PFN1, NDUFB2, PSMB6, NDUFA11, NDUFB7, CCS, NDUFS7, UQCRC1, ATP5MC2, NDU…
KEGG_PATHWAY	hsa04932	Non-alcoholic fatty liver disease	32	1.68618e-07	4.65123e-06	2.84193	NDUFAB1, MAP3K11, NR1H3, NDUFA8, COX4I1, NDUFS2, COX5B, NDUFS5, BAX, NDUFA3, NDUFS6, NDUFS8, COX6C, COX8A, COX5A, CEBPA, NDUFB2, TGFB1, NDUFA11, NDUFB7, TRAF2, NDUFC2, NDUFS3, NDUFS7, UQCRC1, NDUFB10, NDUFV1, NDUFB11, NDUFB9, COX6B1, CYC1, NDUFA1
KEGG_PATHWAY	hsa05022	Pathways of neurodegeneration - multiple diseases	67	1.75518e-07	4.65123e-06	1.93415	PSMD13, NDUFAB1, ATP5F1D, MAP3K10, PSMB4, HRAS, ATP5PF, PSMB7, PSMB1, PSMD8, PARK7, NDUFS5, DCTN3, MAP2K2, SLC25A6, BAX, TUBA4A, NDUFS6, ADRM1, PSMC5, MAP1LC3A, COX5A, PSMA7, TOMM40, FZD2, ATP5MC3, TRAF2, WNT5B, NDUFC2, NDUFS3, AGER, NDUFB10, ATG101, COX6B1, HSD17B10, PSMC3, BAD, COX4I1, NDUFA8, NDUFS2, COX5B, PSMB5, ATP5PD, ARAF, ATP5MC1, NDUFA3, NDUFS8, COX6C, COX8A, PLCB3, NDUFB2, PSMB6, NDUFA…
KEGG_PATHWAY	hsa03010	Ribosome	32	1.36999e-06	3.35122e-05	2.59409	RPL28, RPS3, MRPL34, MRPL14, MRPL27, MRPL20, RPL36, MRPL24, RPS9, MRPL17, RPS16, RPL18, MRPS7, RPS19, RPL36AL, RPLP1, MRPS2, MRPL21, MRPS15, RPS15, FAU, RPS28, MRPL28, RPL3, MRPL12, MRPS12, RPL19, RPL29, RPL10, MRPL4, RPL8, RPL18A
KEGG_PATHWAY	hsa03050	Proteasome	13	6.63397e-05	0.00150686	3.94047	PSMC5, POMP, PSMD13, PSMA7, PSMC3, PSMB6, PSMB4, PSMB10, PSMB7, PSMD8, PSMB1, PSMB5, ADRM1
KEGG_PATHWAY	hsa01230	Biosynthesis of amino acids	15	0.000760181	0.0161158	2.78864	ENO1, PFKL, PKM, TPI1, GAPDH, IDH3G, ALDOA, SDSL, IDH2, TKT, NAGS, SHMT2, IDH3B, ASL, BCAT2
KEGG_PATHWAY	hsa01200	Carbon metabolism	19	0.00142416	0.0283052	2.2838	ENO1, PGLS, PFKL, PKM, TPI1, GAPDH, IDH3G, MDH2, ALDOA, SDSL, FBP1, IDH2, TKT, SHMT2, G6PD, IDH3B, GPI, ACADS, ECHS1
KEGG_PATHWAY	hsa00051	Fructose and mannose metabolism	9	0.002264	0.0423501	3.69085	PMM2, ALDOA, PMM1, SORD, AKR1B1, FBP1, PFKL, TPI1, GMPPA
KEGG_PATHWAY	hsa04142	Lysosome	20	0.00260631	0.0460448	2.11261	ATP6AP1, AP1S1, NAGPA, MAN2B1, GNPTG, CD63, CTSH, NAGA, ATP6V0D1, PSAP, CTSD, ACP2, CLTB, NPC2, SMPD1, CTSG, CLTA, IDUA, ACP5, NAGLU
KEGG_PATHWAY	hsa04723	Retrograde endocannabinoid signaling	21	0.00463611	0.0775938	1.96515	NDUFAB1, PLCB3, NDUFB2, NDUFA11, NDUFB7, NDUFC2, NDUFS2, NDUFA8, NDUFS3, NDUFS7, NDUFB10, NDUFS5, NDUFV1, FAAH, NDUFS6, NDUFA3, NDUFB9, NDUFB11, NDUFS8, NDUFA1, DAGLB
KEGG_PATHWAY	hsa00010	Glycolysis / Gluconeogenesis	12	0.00752426	0.119636	2.49729	ENO1, ALDOA, LDHB, FBP1, PFKL, PKM, TPI1, GAPDH, G6PC3, AKR1A1, GPI, ALDH3B1
KEGG_PATHWAY	hsa00520	Amino sugar and nucleotide sugar metabolism	10	0.00826206	0.125111	2.78864	RENBP, PMM2, GALK1, PMM1, AMDHD2, GMPPA, NANS, NAGK, GPI, CYB5R3
KEGG_PATHWAY	hsa04122	Sulfur relay system	4	0.0155854	0.22528	6.97161	TST, CTU2, CTU1, URM1
KEGG_PATHWAY	hsa00030	Pentose phosphate pathway	7	0.0207683	0.287145	3.14847	ALDOA, PGLS, FBP1, PFKL, TKT, G6PD, GPI
KEGG_PATHWAY	hsa05221	Acute myeloid leukemia	11	0.0220597	0.292291	2.25552	MPO, CD14, ARAF, CEBPA, CEBPE, MAP2K2, EIF4EBP1, RPS6KB2, HRAS, BAD, CSF1R
KEGG_PATHWAY	hsa04146	Peroxisome	12	0.0337836	0.404184	2.01589	PEX11G, MPV17L2, DECR2, ECH1, ABCD1, IDH2, PEX6, PEX16, GSTK1, PMVK, ACOT8, DHRS4
KEGG_PATHWAY	hsa03420	Nucleotide excision repair	10	0.0343175	0.404184	2.21321	POLD4, ERCC2, POLR2I, POLE4, ERCC1, POLR2J, POLD2, POLR2L, POLR2E, POLR2F
KEGG_PATHWAY	hsa03250	Viral life cycle - HIV-1	10	0.0343175	0.404184	2.21321	SMARCB1, MAP1S, PPIA, BST2, VPS4A, NELFE, NELFB, CD4, PIN1, CHMP6
KEGG_PATHWAY	hsa01250	Biosynthesis of nucleotide sugars	7	0.0457214	0.519265	2.63791	PMM2, GALK1, PMM1, GMPPA, NANS, NAGK, GPI

## Sheet: S6
Table S6. GO and KEGG enrichment analysis using 342 down-regulated genes between CON and Responders (Fig.2B(iii))
Category	ID	Term	Count	PValue	FDR	Fold Enrichment	Genes
GOTERM_BP_DIRECT	GO:0007052	mitotic spindle organization	9	4.09065e-07	0.000492105	13.0593	EFHC2, KIF11, DLGAP5, KIF20A, EFHC1, KIF4A, STIL, KIF27, PLK2
GOTERM_BP_DIRECT	GO:0007059	chromosome segregation	9	1.04598e-05	0.00629158	8.53875	BUB1, CENPI, MTCL1, NEK2, TOP2A, DLGAP5, KIF2C, CENPF, HJURP
GOTERM_BP_DIRECT	GO:0051301	cell division	15	3.83895e-05	0.0153942	3.84429	NCAPG, ASPM, CENPF, CDK1, CCNK, BUB1, MTCL1, NEK2, KIF11, MASTL, KIF2C, CDCA7L, CCNA2, TTC28, CDC6
GOTERM_BP_DIRECT	GO:0007018	microtubule-based movement	7	0.000157659	0.047416	8.63363	KIF5A, KIF11, KIF2C, DNAH8, KIF20A, KIF4A, KIF27
GOTERM_BP_DIRECT	GO:0051231	spindle elongation	4	0.000338739	0.0815005	28.1914	KIF11, KIF20A, KIF4A, KIF27
GOTERM_BP_DIRECT	GO:0000278	mitotic cell cycle	8	0.000770289	0.154443	5.33351	TUBB1, NEK2, KIF5A, KIF11, MASTL, ASPM, CENPF, HASPIN
GOTERM_BP_DIRECT	GO:0007517	muscle organ development	6	0.00329765	0.566725	5.98	SGCE, MEF2C, EGR3, DPF3, CENPF, FKTN
GOTERM_BP_DIRECT	GO:0051983	regulation of chromosome segregation	3	0.00524149	0.788188	26.91	BUB1, KIF2C, MKI67
GOTERM_BP_DIRECT	GO:0060285	cilium-dependent cell motility	3	0.00733551	0.980513	22.77	EFHC2, DNAH8, EFHC1
GOTERM_BP_DIRECT	GO:0008360	regulation of cell shape	6	0.0130693	0.999169	4.29	PTK2, PLXNB3, ERMN, STRIP2, COCH, PALM2AKAP2
GOTERM_BP_DIRECT	GO:0007411	axon guidance	7	0.0191505	0.999169	3.32063	KIF5A, PTK2, CCDC141, SEMA3G, APBB2, TTC8, NTN4
GOTERM_BP_DIRECT	GO:0060348	bone development	4	0.0217236	0.999169	6.68949	LARGE1, BMP6, PTGER4, PLS3
GOTERM_BP_DIRECT	GO:0098609	cell-cell adhesion	7	0.0221257	0.999169	3.21251	CD200, COL13A1, FAT4, ICAM1, FAT2, NTN4, COL19A1
GOTERM_BP_DIRECT	GO:0071711	basement membrane organization	3	0.022275	0.999169	12.87	LARGE1, CAV1, NID2
GOTERM_BP_DIRECT	GO:0016477	cell migration	8	0.024193	0.999169	2.80911	DEPDC1B, PTK2, CDK1, STRIP2, PTPRK, NTN4, IQGAP1, GPC4
GOTERM_BP_DIRECT	GO:0046716	muscle cell cellular homeostasis	3	0.0280567	0.999169	11.385	LARGE1, CAV1, LOX
GOTERM_BP_DIRECT	GO:0007346	regulation of mitotic cell cycle	4	0.0313713	0.999169	5.80412	MASTL, DLGAP5, TTC28, IQGAP1
GOTERM_BP_DIRECT	GO:0006493	protein O-linked glycosylation	4	0.0325607	0.999169	5.72	LARGE1, B3GALNT1, FKTN, TET1
GOTERM_BP_DIRECT	GO:0000281	mitotic cytokinesis	4	0.0350094	0.999169	5.55887	EFHC2, KIF20A, EFHC1, KIF4A
GOTERM_BP_DIRECT	GO:0007094	mitotic spindle assembly checkpoint signaling	3	0.038852	0.999169	9.54871	BUB1, CENPF, HASPIN
GOTERM_BP_DIRECT	GO:2001016	positive regulation of skeletal muscle cell differentiation	2	0.0397334	0.999169	49.335	MEF2C, ARNTL
GOTERM_BP_DIRECT	GO:0001958	endochondral ossification	3	0.0435446	0.999169	8.97	MEF2C, BMP6, COL13A1
GOTERM_BP_DIRECT	GO:0030071	regulation of mitotic metaphase/anaphase transition	3	0.045966	0.999169	8.70618	BCL7A, DPF3, CDC6
GOTERM_BP_DIRECT	GO:0046602	regulation of mitotic centrosome separation	2	0.0494188	0.999169	39.468	NEK2, KIF11
KEGG_PATHWAY	hsa04814	Motor proteins	9	0.001064	0.211736	4.29636	TUBB1, KIF5A, KIF11, KIF2C, DNAH8, KIF20A, DNAH6, KIF4A, KIF27
KEGG_PATHWAY	hsa05418	Fluid shear stress and atherosclerosis	6	0.0163006	1	4.00181	IL1R1, CAV1, MEF2C, PTK2, JUN, ICAM1

## Sheet: S7
Table S7. List of gene loci with significant changes in IR ratio between CON and non-Responders (65 IncIR and 145 DecIR loci) (Fig.3A(i))
locus (geneID)	locus (symbol)	geneID	symbol	PValue	FDR	IncLevelDifference	DIR
ENSG00000173209,chr2:61185619-61186444	AHSA2P,chr2:61185619-61186444	ENSG00000173209	AHSA2P	0.00248365	0.0713111	0.08	IncIR
ENSG00000011243,chr19:15398767-15399300	AKAP8L,chr19:15398767-15399300	ENSG00000011243	AKAP8L	0.0228387	0.314623	0.056	IncIR
ENSG00000086848,chr11:111786095-111786400	ALG9,chr11:111786095-111786400	ENSG00000086848	ALG9	0.000954092	0.0387811	0.084	IncIR
ENSG00000103507,chr16:31110500-31111089	BCKDK,chr16:31110500-31111089	ENSG00000103507	BCKDK	0.00325858	0.0854603	0.062	IncIR
ENSG00000168000,chr11:62690874-62691073	BSCL2,chr11:62690874-62691073	ENSG00000168000	BSCL2	0.0317164	0.378756	0.141	IncIR
ENSG00000159214,chr1:43993965-43995106	CCDC24,chr1:43993965-43995106	ENSG00000159214	CCDC24	0.00623283	0.13287	0.139	IncIR
ENSG00000204536,chr6:31144789-31144883	CCHCR1,chr6:31144789-31144883	ENSG00000204536	CCHCR1	0.0214937	0.304389	0.083	IncIR
ENSG00000276070,chr17:36211891-36212495	CCL4L2,chr17:36211891-36212495	ENSG00000276070	CCL4L2	1.62443e-06	0.000351102	0.054	IncIR
ENSG00000166946,chr15:43194138-43194413	CCNDBP1,chr15:43194138-43194413	ENSG00000166946	CCNDBP1	0.0459793	0.460444	0.057	IncIR
ENSG00000169689,chr17:82019382-82019856	CENPX,chr17:82019382-82019856	ENSG00000169689	CENPX	0.018443	0.277573	0.062	IncIR
ENSG00000182923,chr3:134559430-134561375	CEP63,chr3:134559430-134561375	ENSG00000182923	CEP63	0.0125062	0.215289	0.141	IncIR
ENSG00000127586,chr16:789126-789208	CHTF18,chr16:789126-789208	ENSG00000127586	CHTF18	0.0190634	0.284162	0.149	IncIR
ENSG00000149179,chr11:47161191-47161462	CSTPP1,chr11:47161191-47161462	ENSG00000149179	CSTPP1	0.00132697	0.047363	0.083	IncIR
ENSG00000215301,chrX:41338913-41339034	DDX3X,chrX:41338913-41339034	ENSG00000215301	DDX3X	0.0164481	0.255966	0.081	IncIR
ENSG00000185163,chr12:132141021-132141273	DDX51,chr12:132141021-132141273	ENSG00000185163	DDX51	0.000517332	0.0249287	0.105	IncIR
ENSG00000104936,chr19:45778642-45779262	DMPK,chr19:45778642-45779262	ENSG00000104936	DMPK	0.00580752	0.126224	0.068	IncIR
ENSG00000133884,chr11:65344070-65344578	DPF2,chr11:65344070-65344578	ENSG00000133884	DPF2	0.0236292	0.319692	0.166	IncIR
ENSG00000233184,chr1:101080999-101083459	DPH5-DT,chr1:101080999-101083459	ENSG00000233184	DPH5-DT	1.16817e-08	6.05967e-06	0.071	IncIR
ENSG00000145191,chr3:184140222-184140416	EIF2B5,chr3:184140222-184140416	ENSG00000145191	EIF2B5	0.00147884	0.0516002	0.092	IncIR
ENSG00000260565,chr16:2669562-2671343	ERVK13-1,chr16:2669562-2671343	ENSG00000260565	ERVK13-1	0.0040998	0.100002	0.103	IncIR
ENSG00000120699,chr13:37001802-37002271	EXOSC8,chr13:37001802-37002271	ENSG00000120699	EXOSC8	5.73212e-06	0.000874541	0.126	IncIR
ENSG00000026103,chr10:89012082-89012197	FAS,chr10:89012082-89012197	ENSG00000026103	FAS	0.0353011	0.398958	0.088	IncIR
ENSG00000100225,chr22:32487829-32493103	FBXO7,chr22:32487829-32493103	ENSG00000100225	FBXO7	0.00576804	0.125717	0.061	IncIR
ENSG00000112146,chr6:53092825-53093464	FBXO9,chr6:53092825-53093464	ENSG00000112146	FBXO9	0.000554171	0.0262927	0.064	IncIR
ENSG00000162747,chr1:161630033-161630366	FCGR3B,chr1:161630033-161630366	ENSG00000162747	FCGR3B	0.0408307	0.431077	0.161	IncIR
ENSG00000161513,chr17:74864068-74864146	FDXR,chr17:74864068-74864146	ENSG00000161513	FDXR	0.000961928	0.0387811	0.053	IncIR
ENSG00000196295,chr7:30576711-30577647	GARS1-DT,chr7:30576711-30577647	ENSG00000196295	GARS1-DT	0.00482035	0.112647	0.193	IncIR
ENSG00000173230,chr3:121668159-121669195	GOLGB1,chr3:121668159-121669195	ENSG00000173230	GOLGB1	0.00539767	0.120342	0.071	IncIR
ENSG00000143889,chr2:38602601-38602855	HNRNPLL,chr2:38602601-38602855	ENSG00000143889	HNRNPLL	0.0250048	0.328098	0.057	IncIR
ENSG00000159110,chr21:33245075-33246255	IFNAR2,chr21:33245075-33246255	ENSG00000159110	IFNAR2	0.0277686	0.352475	0.217	IncIR
ENSG00000267796,chr19:35752485-35752912	LIN37,chr19:35752485-35752912	ENSG00000267796	LIN37	0.0264211	0.339246	0.065	IncIR
ENSG00000135363,chr11:33869587-33869708	LMO2,chr11:33869587-33869708	ENSG00000135363	LMO2	0.0137067	0.228377	0.069	IncIR
ENSG00000038274,chr5:163512197-163513566	MAT2B,chr5:163512197-163513566	ENSG00000038274	MAT2B	8.48726e-05	0.00695152	0.054	IncIR
ENSG00000090674,chr19:7527629-7527862	MCOLN1,chr19:7527629-7527862	ENSG00000090674	MCOLN1	0.00104151	0.0415588	0.062	IncIR
ENSG00000167965,chr16:2206410-2206477	MLST8,chr16:2206410-2206477	ENSG00000167965	MLST8	0.0226445	0.31296	0.127	IncIR
ENSG00000242086,chr3:195708269-195708745	MUC20-OT1,chr3:195708269-195708745	ENSG00000242086	MUC20-OT1	1.60079e-05	0.00198437	0.061	IncIR
ENSG00000156239,chr21:28872740-28876310	N6AMT1,chr21:28872740-28876310	ENSG00000156239	N6AMT1	0.0219755	0.309319	0.088	IncIR
ENSG00000204356,chr6:31954878-31955057	NELFE,chr6:31954878-31955057	ENSG00000204356	NELFE	0.000515777	0.0249287	0.102	IncIR
ENSG00000249673,chr4:2935736-2937750	NOP14-AS1,chr4:2935736-2937750	ENSG00000249673	NOP14-AS1	7.46176e-05	0.00624301	0.124	IncIR
ENSG00000165671,chr5:177135201-177135939	NSD1,chr5:177135201-177135939	ENSG00000165671	NSD1	0.031646	0.378756	0.079	IncIR
ENSG00000089127,chr12:112917701-112919387	OAS1,chr12:112917701-112919387	ENSG00000089127	OAS1	0.000297039	0.0172482	0.223	IncIR
ENSG00000065989,chr19:10461681-10461875	PDE4A,chr19:10461681-10461875	ENSG00000065989	PDE4A	0.000628234	0.0287547	0.053	IncIR
ENSG00000177595,chr11:800913-800983	PIDD1,chr11:800913-800983	ENSG00000177595	PIDD1	0.0119768	0.209088	0.067	IncIR
ENSG00000177595,chr11:802855-803172	PIDD1,chr11:802855-803172	ENSG00000177595	PIDD1	0.00357255	0.0914407	0.073	IncIR
ENSG00000129219,chr17:4808115-4808272	PLD2,chr17:4808115-4808272	ENSG00000129219	PLD2	0.0203339	0.295182	0.065	IncIR
ENSG00000140650,chr16:8849994-8850931	PMM2,chr16:8849994-8850931	ENSG00000140650	PMM2	0.0416566	0.433329	0.093	IncIR
ENSG00000009830,chr14:77278870-77279821	POMT2,chr14:77278870-77279821	ENSG00000009830	POMT2	0.0325925	0.384058	0.169	IncIR
ENSG00000084072,chr1:39742032-39743214	PPIE,chr1:39742032-39743214	ENSG00000084072	PPIE	0.0289871	0.359542	0.068	IncIR
ENSG00000167393,chrX:341397-341881	PPP2R3B,chrX:341397-341881	ENSG00000167393	PPP2R3B	0.0220582	0.309517	0.085	IncIR
ENSG00000246067,chr11:83072703-83073301	RAB30-DT,chr11:83072703-83073301	ENSG00000246067	RAB30-DT	0.0165863	0.2576	0.054	IncIR
ENSG00000115268,chr19:1438893-1439959	RPS15,chr19:1438893-1439959	ENSG00000115268	RPS15	0.00014577	0.0106004	0.094	IncIR
ENSG00000148396,chr9:136474487-136475196	SEC16A,chr9:136474487-136475196	ENSG00000148396	SEC16A	0.018218	0.275786	0.052	IncIR
ENSG00000204351,chr6:31969421-31969513	SKIC2,chr6:31969421-31969513	ENSG00000204351	SKIC2	0.00843694	0.164531	0.053	IncIR
ENSG00000018280,chr2:218383103-218385145	SLC11A1,chr2:218383103-218385145	ENSG00000018280	SLC11A1	0.0326194	0.384058	0.064	IncIR
ENSG00000112759,chr6:44230047-44230345	SLC29A1,chr6:44230047-44230345	ENSG00000112759	SLC29A1	0.00217833	0.064941	0.157	IncIR
ENSG00000059804,chr12:7929872-7930478	SLC2A3,chr12:7929872-7930478	ENSG00000059804	SLC2A3	0.000199691	0.0128413	0.152	IncIR
ENSG00000196756,chr20:38421099-38422289	SNHG17,chr20:38421099-38422289	ENSG00000196756	SNHG17	0.00529134	0.118717	0.095	IncIR
ENSG00000143376,chr1:151693484-151693591	SNX27,chr1:151693484-151693591	ENSG00000143376	SNX27	0.00970834	0.179006	0.178	IncIR
ENSG00000076382,chr17:28579253-28579363	SPAG5,chr17:28579253-28579363	ENSG00000076382	SPAG5	3.81131e-06	0.000673996	0.09	IncIR
ENSG00000100650,chr14:69769252-69770465	SRSF5,chr14:69769252-69770465	ENSG00000100650	SRSF5	0.00409864	0.100002	0.08	IncIR
ENSG00000102125,chrX:154413253-154413480	TAFAZZIN,chrX:154413253-154413480	ENSG00000102125	TAFAZZIN	0.0197906	0.288913	0.052	IncIR
ENSG00000166471,chr11:9281042-9283369	TMEM41B,chr11:9281042-9283369	ENSG00000166471	TMEM41B	0.0169377	0.260975	0.059	IncIR
ENSG00000221926,chr17:15683158-15684194	TRIM16,chr17:15683158-15684194	ENSG00000221926	TRIM16	0.043719	0.447602	0.135	IncIR
ENSG00000135452,chr12:57746257-57746591	TSPAN31,chr12:57746257-57746591	ENSG00000135452	TSPAN31	0.002767	0.0767557	0.138	IncIR
ENSG00000131462,chr17:42614413-42614494	TUBG1,chr17:42614413-42614494	ENSG00000131462	TUBG1	0.0327246	0.384058	0.051	IncIR
ENSG00000094914,chr12:53308852-53308958	AAAS,chr12:53308852-53308958	ENSG00000094914	AAAS	0.0262913	0.338137	-0.189	DecIR
ENSG00000064687,chr19:1057430-1058616	ABCA7,chr19:1057430-1058616	ENSG00000064687	ABCA7	0.023594	0.319692	-0.162	DecIR
ENSG00000143994,chr2:27129128-27129314	ABHD1,chr2:27129128-27129314	ENSG00000143994	ABHD1	0.000181668	0.0119793	-0.184	DecIR
ENSG00000177646,chr3:128909422-128910019	ACAD9,chr3:128909422-128910019	ENSG00000177646	ACAD9	0.0214112	0.304389	-0.052	DecIR
ENSG00000177646,chr3:128910540-128910739	ACAD9,chr3:128910540-128910739	ENSG00000177646	ACAD9	5.40153e-05	0.00494463	-0.217	DecIR
ENSG00000181513,chr17:45135954-45136106	ACBD4,chr17:45135954-45136106	ENSG00000181513	ACBD4	0.0281541	0.355052	-0.053	DecIR
ENSG00000197381,chr21:45223578-45225545	ADARB1,chr21:45223578-45225545	ENSG00000197381	ADARB1	0.001709	0.0563462	-0.055	DecIR
ENSG00000239900,chr22:40361667-40362979	ADSL,chr22:40361667-40362979	ENSG00000239900	ADSL	0.0317383	0.378756	-0.072	DecIR
ENSG00000239900,chr22:40361678-40362979	ADSL,chr22:40361678-40362979	ENSG00000239900	ADSL	2.70635e-05	0.00296593	-0.081	DecIR
ENSG00000291140,chr17:64972928-64973230	AMZ2P1,chr17:64972928-64973230	ENSG00000291140	AMZ2P1	0.0210143	0.301268	-0.098	DecIR
ENSG00000214087,chr17:81682150-81683011	ARL16,chr17:81682150-81683011	ENSG00000214087	ARL16	0.0488423	0.476841	-0.074	DecIR
ENSG00000069399,chr19:44758474-44758722	BCL3,chr19:44758474-44758722	ENSG00000069399	BCL3	4.10008e-06	0.000678782	-0.074	DecIR
ENSG00000010671,chrX:101353989-101354628	BTK,chrX:101353989-101354628	ENSG00000010671	BTK	9.39883e-05	0.00731323	-0.057	DecIR
ENSG00000198912,chr1:3891058-3892881	C1orf174,chr1:3891058-3892881	ENSG00000198912	C1orf174	0.00627121	0.133323	-0.059	DecIR
ENSG00000135974,chr2:105342975-105343099	C2orf49,chr2:105342975-105343099	ENSG00000135974	C2orf49	0.000134783	0.0100841	-0.148	DecIR
ENSG00000160014,chr19:46605858-46608197	CALM3,chr19:46605858-46608197	ENSG00000160014	CALM3	1.30575e-06	0.000290287	-0.062	DecIR
ENSG00000110888,chr12:30715082-30716506	CAPRIN2,chr12:30715082-30716506	ENSG00000110888	CAPRIN2	0.0191279	0.284279	-0.067	DecIR
ENSG00000110888,chr12:30715145-30716506	CAPRIN2,chr12:30715145-30716506	ENSG00000110888	CAPRIN2	0.00221843	0.0658841	-0.122	DecIR
ENSG00000166762,chr15:43632364-43635358	CATSPER2,chr15:43632364-43635358	ENSG00000166762	CATSPER2	0.00228079	0.0669692	-0.156	DecIR
ENSG00000008128,chr1:1704345-1704548	CDK11A,chr1:1704345-1704548	ENSG00000008128	CDK11A	0.00596337	0.128179	-0.187	DecIR
ENSG00000114656,chr3:128993337-128993978	CFAP92,chr3:128993337-128993978	ENSG00000114656	CFAP92	0.0387699	0.422401	-0.183	DecIR
ENSG00000178971,chr17:8228630-8229300	CTC1,chr17:8228630-8229300	ENSG00000178971	CTC1	0.00707751	0.144921	-0.06	DecIR
ENSG00000167986,chr11:61314203-61314306	DDB1,chr11:61314203-61314306	ENSG00000167986	DDB1	0.00685185	0.141236	-0.098	DecIR
ENSG00000013573,chr12:31089491-31089884	DDX11,chr12:31089491-31089884	ENSG00000013573	DDX11	4.03274e-06	0.000678782	-0.337	DecIR
ENSG00000162777,chr1:111196057-111197918	DENND2D,chr1:111196057-111197918	ENSG00000162777	DENND2D	0.0384133	0.420407	-0.054	DecIR
ENSG00000130826,chrX:154774691-154775193	DKC1,chrX:154774691-154775193	ENSG00000130826	DKC1	3.66113e-09	2.19133e-06	-0.088	DecIR
ENSG00000103423,chr16:4442421-4443015	DNAJA3,chr16:4442421-4443015	ENSG00000103423	DNAJA3	0.0247995	0.326696	-0.067	DecIR
ENSG00000179532,chr11:6497668-6497769	DNHD1,chr11:6497668-6497769	ENSG00000179532	DNHD1	0.0180945	0.27445	-0.165	DecIR
ENSG00000233184,chr1:101080614-101083459	DPH5-DT,chr1:101080614-101083459	ENSG00000233184	DPH5-DT	7.15761e-05	0.00605363	-0.082	DecIR
ENSG00000156508,chr6:73519508-73519881	EEF1A1,chr6:73519508-73519881	ENSG00000156508	EEF1A1	1.86517e-13	3.62823e-10	-0.209	DecIR
ENSG00000145191,chr3:184143143-184143429	EIF2B5,chr3:184143143-184143429	ENSG00000145191	EIF2B5	4.20223e-05	0.00413893	-0.062	DecIR
ENSG00000290928,chr17:30768868-30768999	ENSG00000290928,chr17:30768868-30768999	ENSG00000290928	ENSG00000290928	0.00059109	0.0277141	-0.059	DecIR
ENSG00000291176,chr2:96022754-96022892	ENSG00000291176,chr2:96022754-96022892	ENSG00000291176	ENSG00000291176	0.00313299	0.0834857	-0.086	DecIR
ENSG00000134899,chr13:102872399-102873257	ERCC5,chr13:102872399-102873257	ENSG00000134899	ERCC5	0.00178739	0.0577081	-0.178	DecIR
ENSG00000182473,chr17:76087721-76088462	EXOC7,chr17:76087721-76088462	ENSG00000182473	EXOC7	0.00412921	0.100404	-0.102	DecIR
ENSG00000291049,chr8:8244323-8244583	FAM86B3P,chr8:8244323-8244583	ENSG00000291049	FAM86B3P	0.000409469	0.0213831	-0.062	DecIR
ENSG00000115392,chr2:58161639-58162864	FANCL,chr2:58161639-58162864	ENSG00000115392	FANCL	0.00147473	0.0516002	-0.129	DecIR
ENSG00000125122,chr16:67207505-67207597	FBXL9P,chr16:67207505-67207597	ENSG00000125122	FBXL9P	0.0313427	0.376355	-0.12	DecIR
ENSG00000291135,chr1:121087842-121088649	FCGR1BP,chr1:121087842-121088649	ENSG00000291135	FCGR1BP	0.00251555	0.0719614	-0.124	DecIR
ENSG00000291135,chr1:121087842-121088681	FCGR1BP,chr1:121087842-121088681	ENSG00000291135	FCGR1BP	0.014276	0.234073	-0.071	DecIR
ENSG00000110074,chr11:126275022-126275325	FOXRED1,chr11:126275022-126275325	ENSG00000110074	FOXRED1	0.0361043	0.402475	-0.051	DecIR
ENSG00000089280,chr16:31185180-31188323	FUS,chr16:31185180-31188323	ENSG00000089280	FUS	0.00294384	0.080091	-0.053	DecIR
ENSG00000138757,chr4:75654082-75655064	G3BP2,chr4:75654082-75655064	ENSG00000138757	G3BP2	0.0144378	0.235021	-0.096	DecIR
ENSG00000213930,chr9:34647259-34648113	GALT,chr9:34647259-34648113	ENSG00000213930	GALT	3.16949e-11	2.7402e-08	-0.101	DecIR
ENSG00000234741,chr1:173865283-173865508	GAS5,chr1:173865283-173865508	ENSG00000234741	GAS5	0.000234682	0.0144925	-0.075	DecIR
ENSG00000215252,chr15:34532963-34534052	GOLGA8B,chr15:34532963-34534052	ENSG00000215252	GOLGA8B	4.73188e-05	0.00454552	-0.129	DecIR
ENSG00000186088,chr7:77329392-77330237	GSAP,chr7:77329392-77330237	ENSG00000186088	GSAP	0.00241901	0.0701541	-0.11	DecIR
ENSG00000103253,chr16:727176-727410	HAGHL,chr16:727176-727410	ENSG00000103253	HAGHL	1.63582e-11	1.59104e-08	-0.135	DecIR
ENSG00000206503,chr6:29943027-29943266	HLA-A,chr6:29943027-29943266	ENSG00000206503	HLA-A	0.00278179	0.0767557	-0.057	DecIR
ENSG00000206503,chr6:29943544-29944120	HLA-A,chr6:29943544-29944120	ENSG00000206503	HLA-A	0.00035157	0.018866	-0.055	DecIR
ENSG00000206503,chr6:29944617-29945057	HLA-A,chr6:29944617-29945057	ENSG00000206503	HLA-A	1.07793e-09	7.62489e-07	-0.068	DecIR
ENSG00000234745,chr6:31355593-31356165	HLA-B,chr6:31355593-31356165	ENSG00000234745	HLA-B	8.77824e-06	0.0012197	-0.203	DecIR
ENSG00000234745,chr6:31356443-31356686	HLA-B,chr6:31356443-31356686	ENSG00000234745	HLA-B	0.000839037	0.0356115	-0.25	DecIR
ENSG00000204525,chr6:31269544-31269964	HLA-C,chr6:31269544-31269964	ENSG00000204525	HLA-C	0.00122528	0.0454778	-0.183	DecIR
ENSG00000107521,chr10:98434092-98435633	HPS1,chr10:98434092-98435633	ENSG00000107521	HPS1	0.000453609	0.0227712	-0.083	DecIR
ENSG00000138002,chr2:27458869-27459376	IFT172,chr2:27458869-27459376	ENSG00000138002	IFT172	7.14714e-05	0.00605363	-0.096	DecIR
ENSG00000165359,chrX:135569432-135572813	INTS6L,chrX:135569432-135572813	ENSG00000165359	INTS6L	0.0372421	0.411083	-0.114	DecIR
ENSG00000128604,chr7:128947057-128947276	IRF5,chr7:128947057-128947276	ENSG00000128604	IRF5	0.0355305	0.398958	-0.1	DecIR
ENSG00000105655,chr19:18437989-18438091	ISYNA1,chr19:18437989-18438091	ENSG00000105655	ISYNA1	0.0106382	0.192055	-0.106	DecIR
ENSG00000055955,chr3:52819793-52819938	ITIH4,chr3:52819793-52819938	ENSG00000055955	ITIH4	0.00964135	0.178618	-0.085	DecIR
ENSG00000133706,chr5:146140262-146142854	LARS1,chr5:146140262-146142854	ENSG00000133706	LARS1	4.2263e-08	1.71232e-05	-0.13	DecIR
ENSG00000232931,chr2:95813537-95813808	LINC00342,chr2:95813537-95813808	ENSG00000232931	LINC00342	1.02451e-05	0.00139854	-0.084	DecIR
ENSG00000262468,chr16:4246861-4246971	LINC01569,chr16:4246861-4246971	ENSG00000262468	LINC01569	0.0177218	0.269322	-0.149	DecIR
ENSG00000130332,chr19:2328478-2328559	LSM7,chr19:2328478-2328559	ENSG00000130332	LSM7	0.0472137	0.468584	-0.075	DecIR
ENSG00000248323,chr5:91312496-91313076	LUCAT1,chr5:91312496-91313076	ENSG00000248323	LUCAT1	0.0423798	0.437052	-0.077	DecIR
ENSG00000166986,chr12:57489346-57489453	MARS1,chr12:57489346-57489453	ENSG00000166986	MARS1	0.00214304	0.0644243	-0.088	DecIR
ENSG00000184634,chrX:71127468-71127891	MED12,chrX:71127468-71127891	ENSG00000184634	MED12	0.0402559	0.428113	-0.071	DecIR
ENSG00000172590,chr14:22829941-22830051	MRPL52,chr14:22829941-22830051	ENSG00000172590	MRPL52	0.0150187	0.239959	-0.133	DecIR
ENSG00000204410,chr6:31759178-31759423	MSH5,chr6:31759178-31759423	ENSG00000204410	MSH5	0.00550858	0.121423	-0.065	DecIR
ENSG00000116062,chr2:47805028-47805616	MSH6,chr2:47805028-47805616	ENSG00000116062	MSH6	1.17209e-05	0.00157242	-0.067	DecIR
ENSG00000137409,chr6:36977797-36978076	MTCH1,chr6:36977797-36978076	ENSG00000137409	MTCH1	3.03588e-05	0.00324097	-0.055	DecIR
ENSG00000135297,chr6:73479845-73480037	MTO1,chr6:73479845-73480037	ENSG00000135297	MTO1	0.000463832	0.0231351	-0.066	DecIR
ENSG00000151503,chr11:134153364-134156750	NCAPD3,chr11:134153364-134156750	ENSG00000151503	NCAPD3	0.00725428	0.147723	-0.061	DecIR
ENSG00000166579,chr17:8444177-8444258	NDEL1,chr17:8444177-8444258	ENSG00000166579	NDEL1	0.0133266	0.223961	-0.099	DecIR
ENSG00000089818,chr12:8090300-8092674	NECAP1,chr12:8090300-8092674	ENSG00000089818	NECAP1	0.0120467	0.209546	-0.129	DecIR
ENSG00000114857,chr3:42620044-42621427	NKTR,chr3:42620044-42621427	ENSG00000114857	NKTR	6.84449e-08	2.42077e-05	-0.157	DecIR
ENSG00000196338,chrX:71147628-71148061	NLGN3,chrX:71147628-71148061	ENSG00000196338	NLGN3	0.00151119	0.0520291	-0.137	DecIR
ENSG00000140853,chr16:57028204-57028300	NLRC5,chr16:57028204-57028300	ENSG00000140853	NLRC5	0.00124184	0.0454778	-0.208	DecIR
ENSG00000159899,chr9:35808684-35808753	NPR2,chr9:35808684-35808753	ENSG00000159899	NPR2	0.0222924	0.309517	-0.155	DecIR
ENSG00000114388,chr3:50348564-50348709	NPRL2,chr3:50348564-50348709	ENSG00000114388	NPRL2	0.0205433	0.297115	-0.066	DecIR
ENSG00000046651,chrX:13753442-13755149	OFD1,chrX:13753442-13755149	ENSG00000046651	OFD1	4.98139e-05	0.00472686	-0.056	DecIR
ENSG00000111325,chr12:122975868-122976599	OGFOD2,chr12:122975868-122976599	ENSG00000111325	OGFOD2	3.08537e-05	0.00324422	-0.106	DecIR
ENSG00000111325,chr12:122975868-122976652	OGFOD2,chr12:122975868-122976652	ENSG00000111325	OGFOD2	0.00381414	0.0945482	-0.064	DecIR
ENSG00000147162,chrX:71544636-71547905	OGT,chrX:71544636-71547905	ENSG00000147162	OGT	0.0176067	0.268623	-0.121	DecIR
ENSG00000160781,chr1:156245988-156246121	PAQR6,chr1:156245988-156246121	ENSG00000160781	PAQR6	0.0222379	0.309517	-0.075	DecIR
ENSG00000123349,chr12:53295942-53296242	PFDN5,chr12:53295942-53296242	ENSG00000123349	PFDN5	0.00429873	0.103555	-0.053	DecIR
ENSG00000010318,chr3:52421755-52422758	PHF7,chr3:52421755-52422758	ENSG00000010318	PHF7	0.00644391	0.135148	-0.195	DecIR
ENSG00000183837,chrX:153058772-153059282	PNMA3,chrX:153058772-153059282	ENSG00000183837	PNMA3	0.000154358	0.0109659	-0.077	DecIR
ENSG00000122678,chr7:44074221-44074396	POLM,chr7:44074221-44074396	ENSG00000122678	POLM	0.0120904	0.209546	-0.064	DecIR
ENSG00000130714,chr9:131506454-131507366	POMT1,chr9:131506454-131507366	ENSG00000130714	POMT1	0.003789	0.0945482	-0.11	DecIR
ENSG00000240344,chr2:200881489-200882340	PPIL3,chr2:200881489-200882340	ENSG00000240344	PPIL3	0.00112869	0.0436932	-0.108	DecIR
ENSG00000105122,chr19:15451939-15452656	RASAL3,chr19:15451939-15452656	ENSG00000105122	RASAL3	0.00172389	0.0565974	-0.178	DecIR
ENSG00000119707,chr14:73099751-73103190	RBM25,chr14:73099751-73103190	ENSG00000119707	RBM25	0.026193	0.33743	-0.089	DecIR
ENSG00000140983,chr16:668570-668657	RHOT2,chr16:668570-668657	ENSG00000140983	RHOT2	4.02692e-06	0.000678782	-0.071	DecIR
ENSG00000140983,chr16:668700-670121	RHOT2,chr16:668700-670121	ENSG00000140983	RHOT2	1.79785e-05	0.00215216	-0.21	DecIR
ENSG00000187994,chr19:38876491-38876691	RINL,chr19:38876491-38876691	ENSG00000187994	RINL	2.22431e-05	0.00258319	-0.056	DecIR
ENSG00000167257,chr11:117238647-117239799	RNF214,chr11:117238647-117239799	ENSG00000167257	RNF214	0.00205085	0.0623346	-0.055	DecIR
ENSG00000154134,chr11:124877659-124877935	ROBO3,chr11:124877659-124877935	ENSG00000154134	ROBO3	0.013315	0.223961	-0.058	DecIR
ENSG00000129197,chr17:5426300-5428069	RPAIN,chr17:5426300-5428069	ENSG00000129197	RPAIN	0.0162753	0.254013	-0.075	DecIR
ENSG00000131469,chr17:42998472-42999931	RPL27,chr17:42998472-42999931	ENSG00000131469	RPL27	1.69388e-07	5.73047e-05	-0.08	DecIR
ENSG00000100316,chr22:39313311-39314105	RPL3,chr22:39313311-39314105	ENSG00000100316	RPL3	0.00199296	0.0615365	-0.101	DecIR
ENSG00000182774,chr15:82540133-82540424	RPS17,chr15:82540133-82540424	ENSG00000182774	RPS17	2.12553e-08	9.27166e-06	-0.104	DecIR
ENSG00000167524,chr17:28611482-28611565	RSKR,chr17:28611482-28611565	ENSG00000167524	RSKR	5.70526e-09	3.1709e-06	-0.101	DecIR
ENSG00000111011,chr12:122519030-122521383	RSRC2,chr12:122519030-122521383	ENSG00000111011	RSRC2	0.0356985	0.399723	-0.053	DecIR
ENSG00000211456,chr3:45732152-45737581	SACM1L,chr3:45732152-45737581	ENSG00000211456	SACM1L	0.000903306	0.0373863	-0.068	DecIR
ENSG00000172250,chr22:42502393-42502747	SERHL,chr22:42502393-42502747	ENSG00000172250	SERHL	0.00130224	0.0466948	-0.165	DecIR
ENSG00000147955,chr9:34637090-34637265	SIGMAR1,chr9:34637090-34637265	ENSG00000147955	SIGMAR1	0.0223158	0.309517	-0.069	DecIR
ENSG00000077463,chr19:4175112-4175678	SIRT6,chr19:4175112-4175678	ENSG00000077463	SIRT6	0.000149694	0.0107849	-0.07	DecIR
ENSG00000197375,chr5:132384321-132385326	SLC22A5,chr5:132384321-132385326	ENSG00000197375	SLC22A5	3.36517e-05	0.00344531	-0.123	DecIR
ENSG00000162241,chr11:65377077-65379865	SLC25A45,chr11:65377077-65379865	ENSG00000162241	SLC25A45	0.000944822	0.0387811	-0.096	DecIR
ENSG00000225697,chr3:48629712-48629870	SLC26A6,chr3:48629712-48629870	ENSG00000225697	SLC26A6	0.0269749	0.344649	-0.076	DecIR
ENSG00000255717,chr11:62855467-62855863	SNHG1,chr11:62855467-62855863	ENSG00000255717	SNHG1	0.000162749	0.011296	-0.135	DecIR
ENSG00000174365,chr20:38447013-38447464	SNHG11,chr20:38447013-38447464	ENSG00000174365	SNHG11	0.0222975	0.309517	-0.134	DecIR
ENSG00000174365,chr20:38447624-38448660	SNHG11,chr20:38447624-38448660	ENSG00000174365	SNHG11	0.0384536	0.420407	-0.056	DecIR
ENSG00000174365,chr20:38448731-38450260	SNHG11,chr20:38448731-38450260	ENSG00000174365	SNHG11	0.0237118	0.319692	-0.143	DecIR
ENSG00000203875,chr6:85677869-85677952	SNHG5,chr6:85677869-85677952	ENSG00000203875	SNHG5	5.35343e-07	0.000143638	-0.152	DecIR
ENSG00000203875,chr6:85678189-85678696	SNHG5,chr6:85678189-85678696	ENSG00000203875	SNHG5	5.72455e-11	4.45428e-08	-0.052	DecIR
ENSG00000131876,chr15:101285802-101286906	SNRPA1,chr15:101285802-101286906	ENSG00000131876	SNRPA1	0.00347228	0.0891933	-0.087	DecIR
ENSG00000157734,chr15:64152327-64152636	SNX22,chr15:64152327-64152636	ENSG00000157734	SNX22	0.0118277	0.208215	-0.118	DecIR
ENSG00000186787,chrX:57120102-57120403	SPIN2B,chrX:57120102-57120403	ENSG00000186787	SPIN2B	5.25135e-13	8.17216e-10	-0.185	DecIR
ENSG00000072310,chr17:17817592-17817694	SREBF1,chr17:17817592-17817694	ENSG00000072310	SREBF1	0.00378815	0.0945482	-0.17	DecIR
ENSG00000066923,chr7:100202341-100202452	STAG3,chr7:100202341-100202452	ENSG00000066923	STAG3	0.000431541	0.0220909	-0.09	DecIR
ENSG00000176438,chr14:95450106-95452245	SYNE3,chr14:95450106-95452245	ENSG00000176438	SYNE3	4.98173e-07	0.00013863	-0.173	DecIR
ENSG00000103168,chr16:84180345-84181041	TAF1C,chr16:84180345-84181041	ENSG00000103168	TAF1C	0.00201999	0.0620221	-0.132	DecIR
ENSG00000150433,chr11:125102352-125102635	TMEM218,chr11:125102352-125102635	ENSG00000150433	TMEM218	1.76359e-12	2.28708e-09	-0.113	DecIR
ENSG00000160055,chr1:32215217-32215671	TMEM234,chr1:32215217-32215671	ENSG00000160055	TMEM234	0.0224715	0.311122	-0.133	DecIR
ENSG00000137103,chr9:35829392-35829875	TMEM8B,chr9:35829392-35829875	ENSG00000137103	TMEM8B	5.9508e-14	1.54344e-10	-0.253	DecIR
ENSG00000133112,chr13:45340821-45341040	TPT1,chr13:45340821-45341040	ENSG00000133112	TPT1	0.00671338	0.139671	-0.226	DecIR
ENSG00000248275,chr5:181263767-181264050	TRIM52-AS1,chr5:181263767-181264050	ENSG00000248275	TRIM52-AS1	0.00490029	0.113143	-0.058	DecIR
ENSG00000166436,chr11:8648087-8648414	TRIM66,chr11:8648087-8648414	ENSG00000166436	TRIM66	0.0100801	0.182829	-0.053	DecIR
ENSG00000103197,chr16:2081799-2082434	TSC2,chr16:2081799-2082434	ENSG00000103197	TSC2	0.00495545	0.114078	-0.073	DecIR
ENSG00000110057,chr11:67999376-67999517	UNC93B1,chr11:67999376-67999517	ENSG00000110057	UNC93B1	0.000170127	0.0115109	-0.06	DecIR
ENSG00000165280,chr9:35057528-35059062	VCP,chr9:35057528-35059062	ENSG00000165280	VCP	2.14484e-08	9.27166e-06	-0.066	DecIR
ENSG00000165280,chr9:35062156-35062215	VCP,chr9:35062156-35062215	ENSG00000165280	VCP	0.000281119	0.0166976	-0.074	DecIR
ENSG00000182484,chrX:156022460-156022697	WASH6P,chrX:156022460-156022697	ENSG00000182484	WASH6P	5.57264e-07	0.000144536	-0.108	DecIR
ENSG00000123154,chr19:12669894-12669975	WDR83,chr19:12669894-12669975	ENSG00000123154	WDR83	0.0229315	0.314691	-0.074	DecIR
ENSG00000105875,chr7:135187170-135189342	WDR91,chr7:135187170-135189342	ENSG00000105875	WDR91	1.32939e-08	6.465e-06	-0.111	DecIR
ENSG00000105875,chr7:135204434-135205926	WDR91,chr7:135204434-135205926	ENSG00000105875	WDR91	0.00571661	0.124946	-0.086	DecIR
ENSG00000161179,chr22:21629408-21629600	YDJC,chr22:21629408-21629600	ENSG00000161179	YDJC	0.049155	0.478576	-0.058	DecIR
ENSG00000167840,chr17:5109053-5109392	ZNF232,chr17:5109053-5109392	ENSG00000167840	ZNF232	0.0324379	0.384058	-0.168	DecIR
ENSG00000167840,chr17:5109053-5109476	ZNF232,chr17:5109053-5109476	ENSG00000167840	ZNF232	0.00160211	0.0542002	-0.061	DecIR
ENSG00000083844,chr19:57191528-57191697	ZNF264,chr19:57191528-57191697	ENSG00000083844	ZNF264	0.000842118	0.0356115	-0.073	DecIR
ENSG00000174652,chr19:9418896-9419049	ZNF266,chr19:9418896-9419049	ENSG00000174652	ZNF266	0.0196313	0.287673	-0.068	DecIR
ENSG00000234420,chr10:42552281-42552386	ZNF37BP,chr10:42552281-42552386	ENSG00000234420	ZNF37BP	0.0412045	0.432092	-0.126	DecIR
ENSG00000171163,chr1:248855636-248855723	ZNF692,chr1:248855636-248855723	ENSG00000171163	ZNF692	0.00300812	0.080774	-0.06	DecIR

## Sheet: S8
Table S8. GO and KEGG enrichment analysis using 192 IncIR/DecIR genes between CON and non-Responders (Fig.3A(ii))
Category	ID	Term	Count	PValue	FDR	Fold Enrichment	Genes
GOTERM_BP_DIRECT	GO:0045070	positive regulation of viral genome replication	4	0.00157924	1	17.1191	ADARB1, DDX3X, PPIE, DDB1
GOTERM_BP_DIRECT	GO:0045087	innate immune response	12	0.00399119	1	2.77865	HLA-C, ADARB1, DDX3X, BTK, HLA-A, OAS1, HLA-B, IRF5, UNC93B1, FBXO9, G3BP2, NLRC5
GOTERM_BP_DIRECT	GO:0009411	response to UV	4	0.00630935	1	10.5628	ERCC5, RPAIN, MSH6, SIRT6
GOTERM_BP_DIRECT	GO:0007059	chromosome segregation	5	0.00979442	1	5.96698	CENPX, DDX3X, NDEL1, STAG3, SPAG5
GOTERM_BP_DIRECT	GO:0002486	antigen processing and presentation of endogenous peptide antigen via MHC class I via ER pathway, TAP-independent	3	0.0110106	1	18.617	HLA-C, HLA-A, HLA-B
GOTERM_BP_DIRECT	GO:0002476	antigen processing and presentation of endogenous peptide antigen via MHC class Ib	3	0.0110106	1	18.617	HLA-C, HLA-A, HLA-B
GOTERM_BP_DIRECT	GO:0009615	response to virus	5	0.0118548	1	5.64151	BCL3, DDX3X, OAS1, IFNAR2, TPT1
GOTERM_BP_DIRECT	GO:0006974	DNA damage response	8	0.0119768	1	3.23422	CTC1, BCL3, FANCL, PIDD1, VCP, DDX11, DDB1, MLST8
GOTERM_BP_DIRECT	GO:0007276	gamete generation	3	0.0121062	1	17.7305	DDX3X, FANCL, SPIN2B
GOTERM_BP_DIRECT	GO:0043065	positive regulation of apoptotic process	8	0.0152115	1	3.08356	DDX3X, PNMA3, EIF2B5, PIDD1, MTCH1, IRF5, FAS, DNAJA3
GOTERM_BP_DIRECT	GO:0000413	protein peptidyl-prolyl isomerization	3	0.0169375	1	14.8936	PPIL3, NKTR, PPIE
GOTERM_BP_DIRECT	GO:0006364	rRNA processing	5	0.0191344	1	4.88635	DDX51, RPL27, DKC1, RPS15, RPS17
GOTERM_BP_DIRECT	GO:0034341	response to type II interferon	3	0.0210107	1	13.2978	SLC22A5, DNAJA3, SLC11A1
GOTERM_BP_DIRECT	GO:0035458	cellular response to interferon-beta	3	0.0224501	1	12.8393	OAS1, IFNAR2, CALM3
GOTERM_BP_DIRECT	GO:0000398	mRNA splicing, via spliceosome	6	0.0232598	1	3.68653	SNRPA1, PPIL3, WDR83, SRSF5, PPIE, LSM7
GOTERM_BP_DIRECT	GO:0006412	translation	6	0.0232598	1	3.68653	MRPL52, RPL27, RPL3, EEF1A1, RPS15, RPS17
GOTERM_BP_DIRECT	GO:1904100	positive regulation of protein O-linked glycosylation	2	0.0238289	1	82.7421	POMT2, POMT1
GOTERM_BP_DIRECT	GO:0006919	activation of cysteine-type endopeptidase activity involved in apoptotic process	4	0.025576	1	6.28421	PIDD1, MTCH1, VCP, DNAJA3
GOTERM_BP_DIRECT	GO:0042981	regulation of apoptotic process	6	0.0358691	1	3.29504	BCL3, RBM25, VCP, FAS, TPT1, CDK11A
GOTERM_BP_DIRECT	GO:0036297	interstrand cross-link repair	3	0.0371022	1	9.79841	CENPX, FANCL, VCP
GOTERM_BP_DIRECT	GO:0098586	cellular response to virus	4	0.0397868	1	5.28141	DDX3X, OAS1, IFNAR2, IRF5
GOTERM_BP_DIRECT	GO:0001916	positive regulation of T cell mediated cytotoxicity	3	0.0426125	1	9.08145	HLA-C, HLA-A, HLA-B
GOTERM_BP_DIRECT	GO:0051607	defense response to virus	6	0.0427123	1	3.1289	ADARB1, OAS1, IFNAR2, IRF5, UNC93B1, NLRC5
GOTERM_BP_DIRECT	GO:0002181	cytoplasmic translation	4	0.0430209	1	5.11807	RPL27, RPL3, RPS15, RPS17
GOTERM_BP_DIRECT	GO:0032728	positive regulation of interferon-beta production	3	0.0445131	1	8.86523	DDX3X, OAS1, IRF5
GOTERM_BP_DIRECT	GO:2000781	positive regulation of double-strand break repair	3	0.0464448	1	8.65906	SIRT6, DDX11, DPF2
GOTERM_BP_DIRECT	GO:0042270	protection from natural killer cell mediated cytotoxicity	2	0.0470934	1	41.3711	HLA-A, HLA-B
GOTERM_BP_DIRECT	GO:0006457	protein folding	5	0.0471447	1	3.67199	PPIL3, PFDN5, NKTR, DNAJA3, PPIE
KEGG_PATHWAY	hsa05330	Allograft rejection	4	0.00549446	0.452023	10.9474	HLA-C, HLA-A, HLA-B, FAS
KEGG_PATHWAY	hsa04940	Type I diabetes mellitus	4	0.00776917	0.452023	9.67442	HLA-C, HLA-A, HLA-B, FAS
KEGG_PATHWAY	hsa05332	Graft-versus-host disease	4	0.00828122	0.452023	9.45455	HLA-C, HLA-A, HLA-B, FAS
KEGG_PATHWAY	hsa05169	Epstein-Barr virus infection	7	0.0125557	0.452023	3.58621	HLA-C, BTK, HLA-A, OAS1, HLA-B, IFNAR2, FAS
KEGG_PATHWAY	hsa05320	Autoimmune thyroid disease	4	0.0137812	0.452023	7.84906	HLA-C, HLA-A, HLA-B, FAS
KEGG_PATHWAY	hsa04218	Cellular senescence	6	0.0166286	0.454515	3.97452	HLA-C, TSC2, HLA-A, HLA-B, CALM3, LIN37
KEGG_PATHWAY	hsa05163	Human cytomegalovirus infection	7	0.0202975	0.475541	3.22124	HLA-C, TSC2, CCL4L2, HLA-A, HLA-B, CALM3, FAS
KEGG_PATHWAY	hsa05168	Herpes simplex virus 1 infection	11	0.0255886	0.524567	2.19157	HLA-C, TSC2, EIF2B5, HLA-A, OAS1, HLA-B, IFNAR2, FAS, ZNF266, ZNF264, SRSF5
KEGG_PATHWAY	hsa05167	Kaposi sarcoma-associated herpesvirus infection	6	0.0384555	0.631928	3.18367	HLA-C, HLA-A, HLA-B, IFNAR2, CALM3, FAS
KEGG_PATHWAY	hsa05165	Human papillomavirus infection	8	0.0385322	0.631928	2.4985	HLA-C, TSC2, HLA-A, HLA-B, IFNAR2, PPP2R3B, FAS, TUBG1
KEGG_PATHWAY	hsa05203	Viral carcinogenesis	6	0.045199	0.673876	3.0439	HLA-C, DDX3X, HLA-A, HLA-B, DNAJA3, DDB1

## Sheet: S9
Table S9. List of gene loci with significant changes in IR ratio between CON and Responders (47 IncIR and 96 DecIR loci) (Fig.3B(i))
locus	locus	gene	symbol	PValue	FDR	IncLevelDifference	DIR
ENSG00000184009,chr17:81511804-81511901	ACTG1,chr17:81511804-81511901	ENSG00000184009	ACTG1	1.94114e-09	1.39568e-06	0.057	IncIR
ENSG00000072110,chr14:68877241-68878456	ACTN1,chr14:68877241-68878456	ENSG00000072110	ACTN1	0.000105363	0.00959828	0.062	IncIR
ENSG00000004455,chr1:33010834-33013205	AK2,chr1:33010834-33013205	ENSG00000004455	AK2	0.00769475	0.169049	0.055	IncIR
ENSG00000086848,chr11:111786095-111786400	ALG9,chr11:111786095-111786400	ENSG00000086848	ALG9	0.0370105	0.424356	0.053	IncIR
ENSG00000182220,chrX:40599742-40600767	ATP6AP2,chrX:40599742-40600767	ENSG00000182220	ATP6AP2	0.0184545	0.289597	0.12	IncIR
ENSG00000223745,chr1:93337513-93338228	CCDC18-AS1,chr1:93337513-93338228	ENSG00000223745	CCDC18-AS1	0.00386425	0.106861	0.089	IncIR
ENSG00000111642,chr12:6578118-6578407	CHD4,chr12:6578118-6578407	ENSG00000111642	CHD4	0.0401118	0.444721	0.051	IncIR
ENSG00000215256,chr14:23954034-23954123	DHRS4-AS1,chr14:23954034-23954123	ENSG00000215256	DHRS4-AS1	1.91028e-05	0.00245176	0.202	IncIR
ENSG00000107099,chr9:368136-370228	DOCK8,chr9:368136-370228	ENSG00000107099	DOCK8	0.0420562	0.453804	0.052	IncIR
ENSG00000172269,chr11:119097298-119097443	DPAGT1,chr11:119097298-119097443	ENSG00000172269	DPAGT1	0.0111211	0.212971	0.055	IncIR
ENSG00000172771,chr3:129402580-129404248	EFCAB12,chr3:129402580-129404248	ENSG00000172771	EFCAB12	5.70519e-05	0.00593715	0.069	IncIR
ENSG00000115459,chr2:85390266-85390758	ELMOD3,chr2:85390266-85390758	ENSG00000115459	ELMOD3	0.00048816	0.025739	0.063	IncIR
ENSG00000291067,chr20:58246253-58247320	ENSG00000291067,chr20:58246253-58247320	ENSG00000291067	ENSG00000291067	0.00293479	0.0892798	0.15	IncIR
ENSG00000138081,chr2:47808428-47809156	FBXO11,chr2:47808428-47809156	ENSG00000138081	FBXO11	0.0323198	0.386713	0.066	IncIR
ENSG00000204525,chr6:31269544-31269964	HLA-C,chr6:31269544-31269964	ENSG00000204525	HLA-C	1.75425e-07	5.781e-05	0.098	IncIR
ENSG00000102878,chr16:67166071-67166318	HSF4,chr16:67166071-67166318	ENSG00000102878	HSF4	0.0221962	0.321883	0.081	IncIR
ENSG00000149428,chr11:119055572-119055748	HYOU1,chr11:119055572-119055748	ENSG00000149428	HYOU1	0.000889946	0.0395426	0.08	IncIR
ENSG00000214706,chr3:50290295-50290558	IFRD2,chr3:50290295-50290558	ENSG00000214706	IFRD2	0.000201804	0.0141245	0.118	IncIR
ENSG00000267796,chr19:35752485-35752912	LIN37,chr19:35752485-35752912	ENSG00000267796	LIN37	4.97575e-10	5.62189e-07	0.118	IncIR
ENSG00000135363,chr11:33869587-33869708	LMO2,chr11:33869587-33869708	ENSG00000135363	LMO2	0.000246326	0.0156413	0.099	IncIR
ENSG00000177239,chr9:137105917-137106123	MAN1B1,chr9:137105917-137106123	ENSG00000177239	MAN1B1	1.40787e-05	0.00202451	0.053	IncIR
ENSG00000167965,chr16:2206410-2206482	MLST8,chr16:2206410-2206482	ENSG00000167965	MLST8	0.0274676	0.362008	0.052	IncIR
ENSG00000162576,chr1:1354233-1354352	MXRA8,chr1:1354233-1354352	ENSG00000162576	MXRA8	0.00524425	0.129654	0.102	IncIR
ENSG00000266714,chr17:75620637-75621029	MYO15B,chr17:75620637-75621029	ENSG00000266714	MYO15B	0.00189915	0.0667574	0.072	IncIR
ENSG00000156239,chr21:28872740-28876310	N6AMT1,chr21:28872740-28876310	ENSG00000156239	N6AMT1	0.0190013	0.290679	0.112	IncIR
ENSG00000204356,chr6:31954878-31955057	NELFE,chr6:31954878-31955057	ENSG00000204356	NELFE	0.0270332	0.358734	0.054	IncIR
ENSG00000054148,chr9:136850138-136850504	PHPT1,chr9:136850138-136850504	ENSG00000054148	PHPT1	0.0307825	0.379219	0.055	IncIR
ENSG00000123143,chr19:14469518-14469910	PKN1,chr19:14469518-14469910	ENSG00000123143	PKN1	5.49254e-06	0.000924265	0.056	IncIR
ENSG00000188313,chr3:146521702-146521831	PLSCR1,chr3:146521702-146521831	ENSG00000188313	PLSCR1	0.00183597	0.0654871	0.069	IncIR
ENSG00000138035,chr2:55644721-55645347	PNPT1,chr2:55644721-55645347	ENSG00000138035	PNPT1	0.0464257	0.476253	0.148	IncIR
ENSG00000160972,chr8:144500392-144500485	PPP1R16A,chr8:144500392-144500485	ENSG00000160972	PPP1R16A	0.00456803	0.119631	0.141	IncIR
ENSG00000167595,chr19:35766956-35767070	PROSER3,chr19:35766956-35767070	ENSG00000167595	PROSER3	0.00968578	0.195421	0.056	IncIR
ENSG00000174231,chr17:1684583-1684778	PRPF8,chr17:1684583-1684778	ENSG00000174231	PRPF8	0.030391	0.37682	0.114	IncIR
ENSG00000196642,chr9:136831862-136832260	RABL6,chr9:136831862-136832260	ENSG00000196642	RABL6	0.000293129	0.0176974	0.091	IncIR
ENSG00000158106,chr8:143379986-143380060	RHPN1,chr8:143379986-143380060	ENSG00000158106	RHPN1	0.000795796	0.0366141	0.142	IncIR
ENSG00000115268,chr19:1438893-1439959	RPS15,chr19:1438893-1439959	ENSG00000115268	RPS15	5.08659e-05	0.00551094	0.067	IncIR
ENSG00000115268,chr19:1438893-1439966	RPS15,chr19:1438893-1439966	ENSG00000115268	RPS15	2.34461e-07	6.86796e-05	0.087	IncIR
ENSG00000026036,chr20:63691838-63692803	RTEL1-TNFRSF6B,chr20:63691838-63692803	ENSG00000026036	RTEL1-TNFRSF6B	2.29423e-07	6.86796e-05	0.064	IncIR
ENSG00000288869,chr2:69789927-69790202	SMANTIS,chr2:69789927-69790202	ENSG00000288869	SMANTIS	0.0158122	0.261629	0.118	IncIR
ENSG00000203875,chr6:85677493-85677789	SNHG5,chr6:85677493-85677789	ENSG00000203875	SNHG5	2.86165e-08	1.25738e-05	0.067	IncIR
ENSG00000076382,chr17:28579253-28579363	SPAG5,chr17:28579253-28579363	ENSG00000076382	SPAG5	0.00405471	0.109765	0.118	IncIR
ENSG00000144559,chr3:11807896-11809515	TAMM41,chr3:11807896-11809515	ENSG00000144559	TAMM41	0.010479	0.205654	0.068	IncIR
ENSG00000163472,chr1:156285984-156286258	TMEM79,chr1:156285984-156286258	ENSG00000163472	TMEM79	0.000176028	0.013134	0.146	IncIR
ENSG00000067182,chr12:6330927-6331874	TNFRSF1A,chr12:6330927-6331874	ENSG00000067182	TNFRSF1A	7.36168e-07	0.000171246	0.195	IncIR
ENSG00000170919,chr13:45379336-45379924	TPT1-AS1,chr13:45379336-45379924	ENSG00000170919	TPT1-AS1	0.000190726	0.0135897	0.188	IncIR
ENSG00000135452,chr12:57746257-57746591	TSPAN31,chr12:57746257-57746591	ENSG00000135452	TSPAN31	0.00586845	0.140105	0.109	IncIR
ENSG00000005448,chr2:74423386-74423853	WDR54,chr2:74423386-74423853	ENSG00000005448	WDR54	0.0402787	0.445143	0.07	IncIR
ENSG00000239900,chr22:40361667-40362979	ADSL,chr22:40361667-40362979	ENSG00000239900	ADSL	0.00888437	0.184386	-0.071	DecIR
ENSG00000119844,chr2:64579547-64581188	AFTPH,chr2:64579547-64581188	ENSG00000119844	AFTPH	0.0198969	0.298605	-0.174	DecIR
ENSG00000189046,chr12:109092788-109093245	ALKBH2,chr12:109092788-109093245	ENSG00000189046	ALKBH2	0.0292548	0.372375	-0.055	DecIR
ENSG00000185101,chr11:420616-420716	ANO9,chr11:420616-420716	ENSG00000185101	ANO9	0.0142972	0.25077	-0.058	DecIR
ENSG00000134884,chr13:106557132-106559430	ARGLU1,chr13:106557132-106559430	ENSG00000134884	ARGLU1	0.0110006	0.211174	-0.086	DecIR
ENSG00000137343,chr6:30645975-30646065	ATAT1,chr6:30645975-30646065	ENSG00000137343	ATAT1	0.0442872	0.463512	-0.103	DecIR
ENSG00000137343,chr6:30646110-30646467	ATAT1,chr6:30646110-30646467	ENSG00000137343	ATAT1	0.0154426	0.25767	-0.107	DecIR
ENSG00000069399,chr19:44758474-44758722	BCL3,chr19:44758474-44758722	ENSG00000069399	BCL3	0.000235684	0.0155844	-0.06	DecIR
ENSG00000204256,chr6:32976937-32977258	BRD2,chr6:32976937-32977258	ENSG00000204256	BRD2	0.0220745	0.320932	-0.064	DecIR
ENSG00000010671,chrX:101354695-101356050	BTK,chrX:101354695-101356050	ENSG00000010671	BTK	0.000703928	0.0333375	-0.052	DecIR
ENSG00000092529,chr15:42409996-42410430	CAPN3,chr15:42409996-42410430	ENSG00000092529	CAPN3	0.022788	0.326504	-0.144	DecIR
ENSG00000187796,chr9:136365218-136366798	CARD9,chr9:136365218-136366798	ENSG00000187796	CARD9	0.000932604	0.0405724	-0.059	DecIR
ENSG00000248712,chr11:119193244-119193764	CCDC153,chr11:119193244-119193764	ENSG00000248712	CCDC153	0.0375652	0.429222	-0.072	DecIR
ENSG00000177455,chr16:28932613-28932909	CD19,chr16:28932613-28932909	ENSG00000177455	CD19	0.0182893	0.288326	-0.086	DecIR
ENSG00000196118,chr16:30759558-30759652	CFAP119,chr16:30759558-30759652	ENSG00000196118	CFAP119	0.000554151	0.027759	-0.069	DecIR
ENSG00000113240,chr5:178617435-178618554	CLK4,chr5:178617435-178618554	ENSG00000113240	CLK4	0.0398559	0.443347	-0.127	DecIR
ENSG00000165959,chr14:95193920-95194213	CLMN,chr14:95193920-95194213	ENSG00000165959	CLMN	0.00901915	0.185279	-0.099	DecIR
ENSG00000148444,chr10:22318307-22318651	COMMD3,chr10:22318307-22318651	ENSG00000148444	COMMD3	0.013181	0.239102	-0.061	DecIR
ENSG00000119723,chr14:73958278-73958969	COQ6,chr14:73958278-73958969	ENSG00000119723	COQ6	0.0175329	0.281274	-0.096	DecIR
ENSG00000100201,chr22:38488116-38492054	DDX17,chr22:38488116-38492054	ENSG00000100201	DDX17	0.0199937	0.298923	-0.055	DecIR
ENSG00000198563,chr6:31532912-31535365	DDX39B,chr6:31532912-31535365	ENSG00000198563	DDX39B	0.014076	0.249612	-0.055	DecIR
ENSG00000108654,chr17:64500774-64502008	DDX5,chr17:64500774-64502008	ENSG00000108654	DDX5	0.0298778	0.37682	-0.054	DecIR
ENSG00000072849,chr17:5481143-5481294	DERL2,chr17:5481143-5481294	ENSG00000072849	DERL2	1.17706e-09	1.03438e-06	-0.07	DecIR
ENSG00000007923,chr1:6637505-6638081	DNAJC11,chr1:6637505-6638081	ENSG00000007923	DNAJC11	0.0281158	0.366944	-0.106	DecIR
ENSG00000179532,chr11:6497668-6497769	DNHD1,chr11:6497668-6497769	ENSG00000179532	DNHD1	0.000796262	0.0366141	-0.216	DecIR
ENSG00000145191,chr3:184143143-184143429	EIF2B5,chr3:184143143-184143429	ENSG00000145191	EIF2B5	0.00568535	0.136259	-0.053	DecIR
ENSG00000156976,chr3:186784697-186785881	EIF4A2,chr3:186784697-186785881	ENSG00000156976	EIF4A2	0.0322777	0.386713	-0.072	DecIR
ENSG00000291100,chr20:28583111-28583868	ENSG00000291100,chr20:28583111-28583868	ENSG00000291100	ENSG00000291100	0.041449	0.448796	-0.14	DecIR
ENSG00000260565,chr16:2661382-2663082	ERVK13-1,chr16:2661382-2663082	ENSG00000260565	ERVK13-1	0.0272179	0.359977	-0.099	DecIR
ENSG00000182944,chr22:29288787-29291563	EWSR1,chr22:29288787-29291563	ENSG00000182944	EWSR1	0.0349821	0.409281	-0.055	DecIR
ENSG00000120699,chr13:37003008-37004514	EXOSC8,chr13:37003008-37004514	ENSG00000120699	EXOSC8	0.016887	0.27652	-0.073	DecIR
ENSG00000221968,chr11:61876456-61876864	FADS3,chr11:61876456-61876864	ENSG00000221968	FADS3	0.0210592	0.31004	-0.074	DecIR
ENSG00000221829,chr9:35076871-35076969	FANCG,chr9:35076871-35076969	ENSG00000221829	FANCG	0.0147095	0.252297	-0.078	DecIR
ENSG00000072694,chr1:161671650-161672973	FCGR2B,chr1:161671650-161672973	ENSG00000072694	FCGR2B	0.00082602	0.0375459	-0.084	DecIR
ENSG00000197948,chr5:141646192-141646601	FCHSD1,chr5:141646192-141646601	ENSG00000197948	FCHSD1	0.0322556	0.386713	-0.074	DecIR
ENSG00000144591,chr2:219504219-219505226	GMPPA,chr2:219504219-219505226	ENSG00000144591	GMPPA	2.38152e-11	3.76708e-08	-0.063	DecIR
ENSG00000115523,chr2:85694997-85695318	GNLY,chr2:85694997-85695318	ENSG00000115523	GNLY	0.0265644	0.356703	-0.055	DecIR
ENSG00000234745,chr6:31355593-31356165	HLA-B,chr6:31355593-31356165	ENSG00000234745	HLA-B	0.0054186	0.132271	-0.111	DecIR
ENSG00000234745,chr6:31356443-31356686	HLA-B,chr6:31356443-31356686	ENSG00000234745	HLA-B	0.0474362	0.481609	-0.15	DecIR
ENSG00000137496,chr11:71999663-71999925	IL18BP,chr11:71999663-71999925	ENSG00000137496	IL18BP	0.0313273	0.383156	-0.109	DecIR
ENSG00000126456,chr19:49664847-49665629	IRF3,chr19:49664847-49665629	ENSG00000126456	IRF3	0.00355365	0.100021	-0.061	DecIR
ENSG00000055955,chr3:52819793-52819938	ITIH4,chr3:52819793-52819938	ENSG00000055955	ITIH4	0.00377006	0.104991	-0.067	DecIR
ENSG00000168970,chr15:41834894-41834968	JMJD7-PLA2G4B,chr15:41834894-41834968	ENSG00000168970	JMJD7-PLA2G4B	0.0406544	0.446928	-0.061	DecIR
ENSG00000173338,chr11:65593211-65593308	KCNK7,chr11:65593211-65593308	ENSG00000173338	KCNK7	7.56411e-09	3.59534e-06	-0.093	DecIR
ENSG00000104731,chr16:87755293-87756420	KLHDC4,chr16:87755293-87756420	ENSG00000104731	KLHDC4	0.0407331	0.446928	-0.097	DecIR
ENSG00000130332,chr19:2328478-2328559	LSM7,chr19:2328478-2328559	ENSG00000130332	LSM7	0.00782022	0.170149	-0.069	DecIR
ENSG00000213316,chr5:179795684-179795784	LTC4S,chr5:179795684-179795784	ENSG00000213316	LTC4S	0.0414806	0.448796	-0.095	DecIR
ENSG00000140400,chr15:75358619-75358702	MAN2C1,chr15:75358619-75358702	ENSG00000140400	MAN2C1	1.1975e-06	0.000249238	-0.147	DecIR
ENSG00000213920,chr14:24215663-24215735	MDP1,chr14:24215663-24215735	ENSG00000213920	MDP1	0.0225454	0.324793	-0.072	DecIR
ENSG00000112282,chr6:131592461-131593004	MED23,chr6:131592461-131593004	ENSG00000112282	MED23	0.000377669	0.0211843	-0.054	DecIR
ENSG00000197530,chr1:1628400-1628487	MIB2,chr1:1628400-1628487	ENSG00000197530	MIB2	0.0255041	0.349588	-0.051	DecIR
ENSG00000155363,chr1:112698790-112699456	MOV10,chr1:112698790-112699456	ENSG00000155363	MOV10	0.00192761	0.0674579	-0.066	DecIR
ENSG00000162910,chr1:228108475-228108953	MRPL55,chr1:228108475-228108953	ENSG00000162910	MRPL55	0.00010593	0.00959828	-0.089	DecIR
ENSG00000175110,chr3:139352793-139355680	MRPS22,chr3:139352793-139355680	ENSG00000175110	MRPS22	0.000121621	0.0105703	-0.063	DecIR
ENSG00000204410,chr6:31759178-31759423	MSH5,chr6:31759178-31759423	ENSG00000204410	MSH5	0.0104192	0.2055	-0.069	DecIR
ENSG00000005302,chrX:11763939-11765465	MSL3,chrX:11763939-11765465	ENSG00000005302	MSL3	0.0116085	0.219121	-0.055	DecIR
ENSG00000125459,chr1:155611356-155611547	MSTO1,chr1:155611356-155611547	ENSG00000125459	MSTO1	0.0274559	0.362008	-0.121	DecIR
ENSG00000105835,chr7:106269313-106269989	NAMPT,chr7:106269313-106269989	ENSG00000105835	NAMPT	0.0109951	0.211174	-0.052	DecIR
ENSG00000151503,chr11:134153364-134156750	NCAPD3,chr11:134153364-134156750	ENSG00000151503	NCAPD3	0.0196729	0.295804	-0.061	DecIR
ENSG00000114021,chr3:100345679-100346179	NIT2,chr3:100345679-100346179	ENSG00000114021	NIT2	3.15942e-05	0.00378604	-0.081	DecIR
ENSG00000111325,chr12:122975868-122976652	OGFOD2,chr12:122975868-122976652	ENSG00000111325	OGFOD2	0.000939918	0.0406219	-0.058	DecIR
ENSG00000090621,chr1:39563742-39564421	PABPC4,chr1:39563742-39564421	ENSG00000090621	PABPC4	0.0435525	0.460433	-0.091	DecIR
ENSG00000179818,chr2:70085625-70086250	PCBP1-AS1,chr2:70085625-70086250	ENSG00000179818	PCBP1-AS1	0.0423569	0.453804	-0.079	DecIR
ENSG00000247774,chr12:47206146-47206509	PCED1B-AS1,chr12:47206146-47206509	ENSG00000247774	PCED1B-AS1	0.000150453	0.0118993	-0.059	DecIR
ENSG00000160299,chr21:46442574-46443808	PCNT,chr21:46442574-46443808	ENSG00000160299	PCNT	0.0204647	0.303668	-0.061	DecIR
ENSG00000148985,chr11:3824136-3824268	PGAP2,chr11:3824136-3824268	ENSG00000148985	PGAP2	0.0093892	0.19139	-0.067	DecIR
ENSG00000010318,chr3:52421755-52422758	PHF7,chr3:52421755-52422758	ENSG00000010318	PHF7	1.70093e-05	0.00231943	-0.26	DecIR
ENSG00000132424,chr6:99403883-99404601	PNISR,chr6:99403883-99404601	ENSG00000132424	PNISR	0.0075503	0.166338	-0.108	DecIR
ENSG00000168002,chr11:62761905-62762540	POLR2G,chr11:62761905-62762540	ENSG00000168002	POLR2G	0.040148	0.444721	-0.067	DecIR
ENSG00000130714,chr9:131506454-131507366	POMT1,chr9:131506454-131507366	ENSG00000130714	POMT1	0.0424002	0.453804	-0.069	DecIR
ENSG00000160972,chr8:144500200-144500265	PPP1R16A,chr8:144500200-144500265	ENSG00000160972	PPP1R16A	0.0217676	0.318225	-0.064	DecIR
ENSG00000107551,chr10:44970265-44971771	RASSF4,chr10:44970265-44971771	ENSG00000107551	RASSF4	0.0304182	0.37682	-0.059	DecIR
ENSG00000119707,chr14:73099751-73103190	RBM25,chr14:73099751-73103190	ENSG00000119707	RBM25	0.0424025	0.453804	-0.059	DecIR
ENSG00000003756,chr3:50100606-50103081	RBM5,chr3:50100606-50103081	ENSG00000003756	RBM5	0.0170656	0.278536	-0.061	DecIR
ENSG00000265241,chr1:145926884-145927016	RBM8A,chr1:145926884-145927016	ENSG00000265241	RBM8A	0.0021177	0.072506	-0.076	DecIR
ENSG00000285533,chr11:65663684-65665419	RELA-DT,chr11:65663684-65665419	ENSG00000285533	RELA-DT	0.00321826	0.0939234	-0.151	DecIR
ENSG00000140983,chr16:668700-670121	RHOT2,chr16:668700-670121	ENSG00000140983	RHOT2	0.000565078	0.027759	-0.176	DecIR
ENSG00000100599,chr14:92685151-92687684	RIN3,chr14:92685151-92687684	ENSG00000100599	RIN3	0.0388113	0.437263	-0.058	DecIR
ENSG00000167257,chr11:117238647-117239799	RNF214,chr11:117238647-117239799	ENSG00000167257	RNF214	4.44089e-14	1.75615e-10	-0.105	DecIR
ENSG00000117616,chr1:25243634-25245148	RSRP1,chr1:25243634-25245148	ENSG00000117616	RSRP1	0.00247284	0.0798274	-0.072	DecIR
ENSG00000073060,chr12:124782812-124786355	SCARB1,chr12:124782812-124786355	ENSG00000073060	SCARB1	0.0253058	0.348682	-0.122	DecIR
ENSG00000115524,chr2:197418589-197420426	SF3B1,chr2:197418589-197420426	ENSG00000115524	SF3B1	0.0287136	0.368025	-0.086	DecIR
ENSG00000143499,chr1:214331071-214332016	SMYD2,chr1:214331071-214332016	ENSG00000143499	SMYD2	0.00831933	0.177404	-0.059	DecIR
ENSG00000143499,chr1:214332193-214334198	SMYD2,chr1:214332193-214334198	ENSG00000143499	SMYD2	0.0269829	0.358669	-0.056	DecIR
ENSG00000174365,chr20:38447624-38448660	SNHG11,chr20:38447624-38448660	ENSG00000174365	SNHG11	0.00110566	0.0457837	-0.065	DecIR
ENSG00000197912,chr16:89554564-89555876	SPG7,chr16:89554564-89555876	ENSG00000197912	SPG7	0	0	-0.107	DecIR
ENSG00000035720,chr4:67606390-67607192	STAP1,chr4:67606390-67607192	ENSG00000035720	STAP1	0.00227519	0.0759261	-0.068	DecIR
ENSG00000064995,chr6:34880064-34880287	TAF11,chr6:34880064-34880287	ENSG00000064995	TAF11	0.00307473	0.0917663	-0.065	DecIR
ENSG00000204852,chr12:110641628-110642247	TCTN1,chr12:110641628-110642247	ENSG00000204852	TCTN1	0.00437691	0.115007	-0.133	DecIR
ENSG00000171204,chr11:85635779-85636044	TMEM126B,chr11:85635779-85636044	ENSG00000171204	TMEM126B	0.00877857	0.183192	-0.072	DecIR
ENSG00000127419,chr4:948155-948409	TMEM175,chr4:948155-948409	ENSG00000127419	TMEM175	0.0222213	0.321883	-0.053	DecIR
ENSG00000134900,chr13:102645010-102646292	TPP2,chr13:102645010-102646292	ENSG00000134900	TPP2	0.018305	0.288326	-0.08	DecIR
ENSG00000133112,chr13:45340821-45341040	TPT1,chr13:45340821-45341040	ENSG00000133112	TPT1	9.48139e-05	0.00892718	-0.256	DecIR
ENSG00000149743,chr11:64224971-64225497	TRPT1,chr11:64224971-64225497	ENSG00000149743	TRPT1	0.0195726	0.295804	-0.072	DecIR
ENSG00000163728,chr3:180608811-180609628	TTC14,chr3:180608811-180609628	ENSG00000163728	TTC14	0.0109179	0.211124	-0.146	DecIR
ENSG00000182484,chrX:156022460-156022697	WASH6P,chrX:156022460-156022697	ENSG00000182484	WASH6P	3.51409e-06	0.000689694	-0.059	DecIR
ENSG00000023041,chr10:112433282-112434295	ZDHHC6,chr10:112433282-112434295	ENSG00000023041	ZDHHC6	0.000552174	0.027759	-0.104	DecIR
ENSG00000167840,chr17:5109053-5109392	ZNF232,chr17:5109053-5109392	ENSG00000167840	ZNF232	0.00222905	0.0750195	-0.182	DecIR

## Sheet: S10
Table S10. GO and KEGG enrichment analysis using 140 IncIR/DecIR genes between CON and Responders (Fig.3B(ii))
Category	ID	Term	Count	PValue	FDR	Fold Enrichment	Genes
GOTERM_BP_DIRECT	GO:0000956	nuclear-transcribed mRNA catabolic process	4	0.000409782	0.122567	27.1071	EXOSC8, POLR2G, DDX5, LSM7
GOTERM_BP_DIRECT	GO:0000381	regulation of alternative mRNA splicing, via spliceosome	5	0.000464568	0.122567	13.7653	RBM5, RBM25, RBM8A, DDX17, DDX5
GOTERM_BP_DIRECT	GO:0000245	spliceosomal complex assembly	4	0.000512118	0.122567	25.1709	RBM5, DDX39B, RSRP1, SF3B1
GOTERM_BP_DIRECT	GO:0000398	mRNA splicing, via spliceosome	7	0.000991997	0.178064	6.10582	RBM5, DDX39B, PRPF8, RBM8A, SF3B1, DDX5, LSM7
GOTERM_BP_DIRECT	GO:0042981	regulation of apoptotic process	7	0.00175993	0.252726	5.45741	BCL3, ACTN1, CARD9, RBM25, FBXO11, TPT1, IRF3
GOTERM_BP_DIRECT	GO:0030889	negative regulation of B cell proliferation	3	0.00452318	0.541274	29.3661	BTK, FCGR2B, PKN1
GOTERM_BP_DIRECT	GO:0006401	RNA catabolic process	3	0.0139322	1	16.5184	EXOSC8, PNPT1, PABPC4
GOTERM_BP_DIRECT	GO:0007005	mitochondrion organization	4	0.0219901	1	6.64892	FANCG, PNPT1, MSTO1, RHOT2
GOTERM_BP_DIRECT	GO:0071042	nuclear polyadenylation-dependent mRNA catabolic process	2	0.0223118	1	88.0982	EXOSC8, PNPT1
GOTERM_BP_DIRECT	GO:0008380	RNA splicing	5	0.0269134	1	4.383	DDX39B, PRPF8, RBM25, RBM8A, SF3B1
GOTERM_BP_DIRECT	GO:0009299	mRNA transcription	2	0.0278122	1	70.4786	DDX5, IRF3
GOTERM_BP_DIRECT	GO:2001014	regulation of skeletal muscle cell differentiation	2	0.033282	1	58.7321	DDX17, DDX5
GOTERM_BP_DIRECT	GO:0006367	transcription initiation at RNA polymerase II promoter	3	0.0334285	1	10.3645	MED23, POLR2G, TAF11
GOTERM_BP_DIRECT	GO:0051607	defense response to virus	5	0.0455103	1	3.70161	MOV10, CARD9, PLSCR1, DDX17, IRF3
GOTERM_BP_DIRECT	GO:0042088	T-helper 1 type immune response	2	0.0495089	1	39.1548	BCL3, IL18BP
KEGG_PATHWAY	hsa03040	Spliceosome	7	0.00266906	0.39769	4.89402	DDX39B, PRPF8, RBM25, RBM8A, SF3B1, DDX5, LSM7
KEGG_PATHWAY	hsa03018	RNA degradation	4	0.0137437	0.906532	7.81609	EXOSC8, PNPT1, PABPC4, LSM7
KEGG_PATHWAY	hsa04145	Phagosome	5	0.0182523	0.906532	4.85394	HLA-C, FCGR2B, HLA-B, SCARB1, ACTG1
KEGG_PATHWAY	hsa05169	Epstein-Barr virus infection	5	0.0414647	1	3.75403	HLA-C, CD19, BTK, HLA-B, IRF3
KEGG_PATHWAY	hsa05203	Viral carcinogenesis	5	0.042734	1	3.71741	HLA-C, ACTN1, HLA-B, CHD4, IRF3
KEGG_PATHWAY	hsa00510	N-Glycan biosynthesis	3	0.0456462	1	8.6272	ALG9, MAN1B1, DPAGT1

[truncated: 2 more sheets: S11, S12]
